# Supplementary material for: The design of anion–π interactions and hydrogen bonds for the recognition of chloride, bromide and nitrate anions
Source: Royal Society of Chemistry journal article supplement (doi:10.1039/d1cp00113b), 2021-01-01
Supplement: d1cp00113b1.pdf [file d1cp00113b1.pdf]

ARTICLE

## Design of Anion– $\pi$ Interactions and Hydrogen Bonds to Recognition of the Chloride, Bromide and Nitrate Anions

Renato Pereira Orenha,<sup>\*a</sup> Vanessa Borges da Silva,<sup>a</sup> Giovanni Finoto Caramori,<sup>b</sup> Maurício Jeomar Piotrowski,<sup>c</sup> Glaucio Regis Nagurniak,<sup>d</sup> and Renato Luis Tame Parreira<sup>\*a</sup>

### Supplementary Material

<sup>a</sup> Núcleo de Pesquisas em Ciências Exatas e Tecnológicas, Universidade de Franca, Franca, SP, Brazil. E-mail: rpo9@hotmail.com / renato.parreira@unifran.edu.br

<sup>b</sup> Departamento de Química, Universidade Federal de Santa Catarina, Campus Universitário Trindade, CP 476, Florianópolis, SC, 88040–900, Brazil.

<sup>c</sup> Department of Physics, Federal University of Pelotas, PO Box 354, 96010-900, Pelotas, RS, Brazil.

<sup>d</sup> Department of Exact Sciences and Education, Federal University of Santa Catarina, 89036-004, Blumenau, SC, Brazil.

**Table S1.** Optimized Cartesian coordinates for the compounds investigated in this study using the B97D3/6-31+G(d) + PCM(DMSO) computational model.

| Compound | $1^{\cdots}\text{Cl}^-$ |           |           |
|----------|-------------------------|-----------|-----------|
| Atom     | X                       | Y         | Z         |
| C        | -3.905271               | -2.732627 | -4.263589 |
| C        | -4.605072               | -1.660825 | -3.751756 |
| C        | -3.923185               | -0.534436 | -3.184528 |
| C        | -2.467833               | -0.512987 | -3.160203 |
| C        | -1.785953               | -1.658839 | -3.695796 |
| C        | -2.478399               | -2.728444 | -4.228001 |
| C        | -4.640277               | 0.544018  | -2.643169 |
| C        | -3.988631               | 1.647274  | -2.067968 |
| C        | -2.535546               | 1.686675  | -2.043214 |
| C        | -1.795533               | 0.610131  | -2.605393 |
| C        | -4.734763               | 2.732338  | -1.501934 |
| C        | -4.096024               | 3.810217  | -0.925633 |
| C        | -2.669987               | 3.853918  | -0.893400 |
| C        | -1.916212               | 2.830244  | -1.434461 |
| C        | -0.279260               | 0.638535  | -2.555311 |
| N        | 0.208736                | 0.115697  | -1.264184 |
| C        | 0.982064                | 0.803384  | -0.430497 |
| C        | 1.496128                | 0.530307  | 0.881110  |
| C        | 2.211792                | 1.840014  | 0.917791  |
| C        | 1.661154                | 2.122020  | -0.470904 |
| N        | 1.292524                | -0.558526 | 1.648501  |
| O        | 2.939184                | 2.461235  | 1.705181  |
| O        | 1.735928                | 3.055844  | -1.282910 |
| C        | 1.784315                | -0.866406 | 2.934083  |
| C        | 1.380882                | -2.097696 | 3.495592  |
| C        | 1.832118                | -2.468532 | 4.767411  |
| C        | 2.687352                | -1.623854 | 5.494327  |
| C        | 3.084379                | -0.401001 | 4.928976  |
| C        | 2.642115                | -0.013926 | 3.656469  |
| H        | -4.434459               | -3.585915 | -4.689832 |
| H        | -5.696701               | -1.651517 | -3.763261 |
| H        | -0.699156               | -1.705758 | -3.674138 |
| H        | -1.927974               | -3.584441 | -4.621072 |
| H        | -5.732174               | 0.520540  | -2.662023 |
| H        | -5.824904               | 2.683218  | -1.534850 |
| H        | -4.673737               | 4.628960  | -0.494566 |
| H        | -2.168054               | 4.707776  | -0.435675 |
| H        | -0.832671               | 2.905575  | -1.390696 |
| H        | 0.157418                | 0.042470  | -3.364610 |
| H        | 0.112399                | 1.652066  | -2.672833 |
| H        | -0.153311               | -0.801660 | -0.954416 |
| H        | 0.675119                | -1.282461 | 1.235378  |
| H        | 0.716615                | -2.752895 | 2.930421  |
| H        | 1.512439                | -3.422510 | 5.189680  |
| H        | 3.748445                | 0.265537  | 5.482143  |
| H        | 2.954965                | 0.937414  | 3.228571  |
| H        | 3.038345                | -1.914141 | 6.485306  |
| Cl       | -0.664359               | -2.672721 | 0.170622  |
| Compound | $1^{\cdots}\text{Br}^-$ |           |           |
| Atom     | X                       | Y         | Z         |
| C        | -3.708586               | -2.860744 | -4.020856 |
| C        | -4.425905               | -1.842498 | -3.429877 |
| C        | -3.774382               | -0.653347 | -2.964781 |
| C        | -2.337203               | -0.508772 | -3.133031 |
| C        | -1.635156               | -1.599687 | -3.749122 |
| C        | -2.295545               | -2.734194 | -4.176199 |
| C        | -4.504655               | 0.370393  | -2.341036 |
| C        | -3.877410               | 1.524714  | -1.843710 |

|          |           |                        |           |
|----------|-----------|------------------------|-----------|
| C        | -2.441125 | 1.683450               | -2.003843 |
| C        | -1.695993 | 0.670077               | -2.665912 |
| C        | -4.630783 | 2.547572               | -1.180185 |
| C        | -4.012141 | 3.670487               | -0.671731 |
| C        | -2.600080 | 3.824671               | -0.808761 |
| C        | -1.841589 | 2.866443               | -1.453233 |
| C        | -0.185481 | 0.776067               | -2.737611 |
| N        | 0.380099  | 0.195721               | -1.500997 |
| C        | 1.103083  | 0.880805               | -0.618609 |
| C        | 1.509221  | 0.598691               | 0.726337  |
| C        | 2.285472  | 1.871795               | 0.803901  |
| C        | 1.834666  | 2.170342               | -0.621729 |
| N        | 1.166955  | -0.454567              | 1.493952  |
| O        | 2.987045  | 2.460762               | 1.636655  |
| O        | 1.985076  | 3.101139               | -1.425400 |
| C        | 1.586328  | -0.806113              | 2.792872  |
| C        | 0.967724  | -1.930837              | 3.381160  |
| C        | 1.344157  | -2.342691              | 4.664291  |
| C        | 2.334817  | -1.645107              | 5.375439  |
| C        | 2.944409  | -0.526620              | 4.783708  |
| C        | 2.580835  | -0.101631              | 3.498434  |
| H        | -4.213070 | -3.764368              | -4.365801 |
| H        | -5.506510 | -1.925387              | -3.298113 |
| H        | -0.555132 | -1.553669              | -3.872295 |
| H        | -1.728820 | -3.548696              | -4.629842 |
| H        | -5.583825 | 0.255388               | -2.217141 |
| H        | -5.709557 | 2.412744               | -1.079937 |
| H        | -4.594889 | 4.439957               | -0.163564 |
| H        | -2.113191 | 4.710934               | -0.398985 |
| H        | -0.768491 | 3.023667               | -1.534994 |
| H        | 0.218235  | 0.238936               | -3.602829 |
| H        | 0.161810  | 1.808254               | -2.821857 |
| H        | -0.089401 | -0.661297              | -1.163576 |
| H        | 0.461119  | -1.092551              | 1.082808  |
| H        | 0.197709  | -2.469682              | 2.827189  |
| H        | 0.859488  | -3.213344              | 5.108913  |
| H        | 3.715241  | 0.025164               | 5.324479  |
| H        | 3.052557  | 0.772181               | 3.051793  |
| H        | 2.626992  | -1.968247              | 6.375296  |
| Br       | -1.249152 | -2.303017              | 0.059071  |
| Compound |           | $1^{-}\text{NO}_3^{-}$ |           |
| Atom     | X         | Y                      | Z         |
| C        | -3.784067 | -2.873554              | -3.860130 |
| C        | -4.494744 | -1.804094              | -3.358100 |
| C        | -3.829180 | -0.608890              | -2.930700 |
| C        | -2.381992 | -0.514056              | -3.043051 |
| C        | -1.686763 | -1.658106              | -3.564075 |
| C        | -2.362626 | -2.796165              | -3.957975 |
| C        | -4.552240 | 0.468523               | -2.395107 |
| C        | -3.912049 | 1.636518               | -1.949907 |
| C        | -2.465616 | 1.746784               | -2.056540 |
| C        | -1.723824 | 0.673631               | -2.621242 |
| C        | -4.663279 | 2.717878               | -1.383510 |
| C        | -4.035308 | 3.856351               | -0.924037 |
| C        | -2.615413 | 3.966919               | -1.014272 |
| C        | -1.857442 | 2.950374               | -1.562780 |
| C        | -0.209676 | 0.747463               | -2.685068 |
| N        | 0.370415  | 0.182580               | -1.450249 |
| C        | 1.035211  | 0.894935               | -0.544046 |
| C        | 1.468149  | 0.588766               | 0.786172  |
| C        | 2.118993  | 1.924779               | 0.927816  |
| C        | 1.651191  | 2.242406               | -0.488047 |

| ARTICLE  |           |                   |           | Journal Name |
|----------|-----------|-------------------|-----------|--------------|
| N        | 1.241654  | -0.540861         | 1.484708  |              |
| O        | 2.759936  | 2.539162          | 1.790470  |              |
| O        | 1.733978  | 3.212348          | -1.254395 |              |
| C        | 1.652972  | -0.901052         | 2.783182  |              |
| C        | 1.184963  | -2.133861         | 3.287470  |              |
| C        | 1.563859  | -2.556291         | 4.566723  |              |
| C        | 2.407190  | -1.759733         | 5.358801  |              |
| C        | 2.867211  | -0.533616         | 4.851087  |              |
| C        | 2.500144  | -0.097246         | 3.570888  |              |
| H        | -4.300537 | -3.780500         | -4.177194 |              |
| H        | -5.581838 | -1.850250         | -3.268867 |              |
| H        | -0.601444 | -1.647246         | -3.643596 |              |
| H        | -1.802362 | -3.649239         | -4.343384 |              |
| H        | -5.638554 | 0.391384          | -2.310904 |              |
| H        | -5.748251 | 2.615333          | -1.318776 |              |
| H        | -4.616540 | 4.671232          | -0.490383 |              |
| H        | -2.121157 | 4.866524          | -0.644205 |              |
| H        | -0.778526 | 3.077305          | -1.608463 |              |
| H        | 0.181217  | 0.191326          | -3.544723 |              |
| H        | 0.153290  | 1.772268          | -2.786757 |              |
| H        | 0.024663  | -0.740643         | -1.152342 |              |
| H        | 0.642352  | -1.232075         | 1.001258  |              |
| H        | 0.529839  | -2.754809         | 2.674659  |              |
| H        | 1.195579  | -3.511484         | 4.944029  |              |
| H        | 3.522724  | 0.095684          | 5.455555  |              |
| H        | 2.857588  | 0.857936          | 3.189001  |              |
| H        | 2.701087  | -2.089692         | 6.355855  |              |
| N        | -1.616550 | -2.250713         | 0.197360  |              |
| O        | -2.047116 | -1.185998         | 0.712123  |              |
| O        | -2.359813 | -3.244057         | 0.007651  |              |
| O        | -0.368934 | -2.323416         | -0.146489 |              |
| Compound |           | 2-Cl <sup>-</sup> |           |              |
| Atom     | X         | Y                 | Z         |              |
| C        | -3.659884 | -2.733283         | -4.357258 |              |
| C        | -4.455875 | -1.656335         | -4.045509 |              |
| C        | -3.926192 | -0.508154         | -3.372597 |              |
| C        | -2.505613 | -0.455922         | -3.032634 |              |
| C        | -1.743250 | -1.631854         | -3.352230 |              |
| C        | -2.291575 | -2.721167         | -3.992703 |              |
| C        | -4.722292 | 0.595534          | -3.028768 |              |
| C        | -4.246665 | 1.707490          | -2.314960 |              |
| C        | -2.824297 | 1.746393          | -1.981519 |              |
| C        | -1.958366 | 0.704131          | -2.416839 |              |
| C        | -5.099937 | 2.789335          | -1.924127 |              |
| C        | -4.615305 | 3.861425          | -1.211984 |              |
| C        | -3.249162 | 3.895575          | -0.842566 |              |
| C        | -2.394849 | 2.877713          | -1.207644 |              |
| C        | -0.449300 | 0.851868          | -2.284806 |              |
| N        | 0.025389  | 0.326072          | -0.996231 |              |
| C        | 1.100202  | 0.785632          | -0.365081 |              |
| C        | 1.723404  | 0.429901          | 0.874692  |              |
| C        | 2.782524  | 1.465687          | 0.686548  |              |
| C        | 2.110006  | 1.839285          | -0.628732 |              |
| N        | 1.342948  | -0.517180         | 1.755966  |              |
| O        | 3.778756  | 1.873100          | 1.298982  |              |
| O        | 2.317262  | 2.665162          | -1.527714 |              |
| C        | 1.928283  | -0.904423         | 2.979113  |              |
| C        | 1.281762  | -1.930246         | 3.702686  |              |
| C        | 1.809366  | -2.364965         | 4.923886  |              |
| C        | 2.981832  | -1.787945         | 5.439373  |              |
| C        | 3.619104  | -0.768252         | 4.713645  |              |
| C        | 3.104683  | -0.320918         | 3.488944  |              |

| Journal Name |           |                      |           | ARTICLE |
|--------------|-----------|----------------------|-----------|---------|
| H            | -0.157819 | 1.899354             | -2.361049 |         |
| H            | -0.496566 | -0.459788            | -0.572614 |         |
| H            | 0.486086  | -1.040478            | 1.499852  |         |
| H            | 0.371169  | -2.377860            | 3.301955  |         |
| H            | 1.299740  | -3.158369            | 5.472842  |         |
| H            | 4.530863  | -0.310638            | 5.101639  |         |
| H            | 3.606323  | 0.471617             | 2.935561  |         |
| H            | 3.391860  | -2.127790            | 6.391137  |         |
| Cl           | -1.372722 | -2.010850            | 0.732644  |         |
| F            | -1.126782 | 2.987471             | -0.745711 |         |
| F            | -2.806349 | 4.927443             | -0.099902 |         |
| F            | -5.420996 | 4.873112             | -0.839105 |         |
| F            | -6.416789 | 2.792037             | -2.226879 |         |
| F            | -6.022639 | 0.583923             | -3.398017 |         |
| F            | -5.760903 | -1.731480            | -4.387582 |         |
| F            | -4.161710 | -3.813686            | -4.983795 |         |
| F            | -1.544612 | -3.810581            | -4.252467 |         |
| F            | -0.444603 | -1.762797            | -2.987919 |         |
| H            | 0.047902  | 0.332943             | -3.109548 |         |
| Compound     |           | $2^{-}\text{Br}^{-}$ |           |         |
| Atom         | X         | Y                    | Z         |         |
| C            | -3.458371 | -2.915168            | -3.890671 |         |
| C            | -4.291761 | -1.904586            | -3.474616 |         |
| C            | -3.771591 | -0.651597            | -3.015947 |         |
| C            | -2.328856 | -0.421678            | -2.994173 |         |
| C            | -1.519407 | -1.527366            | -3.431097 |         |
| C            | -2.057648 | -2.719993            | -3.860136 |         |
| C            | -4.607338 | 0.382092             | -2.566743 |         |
| C            | -4.136432 | 1.589657             | -2.028694 |         |
| C            | -2.690018 | 1.793646             | -1.975457 |         |
| C            | -1.812323 | 0.821966             | -2.531983 |         |
| C            | -5.021042 | 2.608354             | -1.547147 |         |
| C            | -4.539736 | 3.762163             | -0.975422 |         |
| C            | -3.142151 | 3.947474             | -0.851138 |         |
| C            | -2.259329 | 2.998021             | -1.317986 |         |
| C            | -0.308215 | 1.058803             | -2.535333 |         |
| N            | 0.229373  | 0.480194             | -1.294295 |         |
| C            | 1.245574  | 0.940634             | -0.575549 |         |
| C            | 1.738380  | 0.537745             | 0.705836  |         |
| C            | 2.836004  | 1.546265             | 0.649269  |         |
| C            | 2.296494  | 1.976917             | -0.714279 |         |
| N            | 1.227196  | -0.407795            | 1.521382  |         |
| O            | 3.779263  | 1.905945             | 1.365676  |         |
| O            | 2.598369  | 2.826967             | -1.561253 |         |
| C            | 1.687005  | -0.879798            | 2.767295  |         |
| C            | 0.897804  | -1.856080            | 3.413279  |         |
| C            | 1.303560  | -2.374502            | 4.648074  |         |
| C            | 2.487169  | -1.924408            | 5.256591  |         |
| C            | 3.262811  | -0.948295            | 4.609830  |         |
| C            | 2.873994  | -0.421805            | 3.370426  |         |
| H            | -0.064856 | 2.118128             | -2.580023 |         |
| H            | -0.342557 | -0.273869            | -0.877255 |         |
| H            | 0.358597  | -0.860201            | 1.189021  |         |
| H            | -0.021312 | -2.203318            | 2.938700  |         |
| H            | 0.688438  | -3.131587            | 5.136955  |         |
| H            | 4.184114  | -0.588727            | 5.071316  |         |
| H            | 3.479412  | 0.338153             | 2.878137  |         |
| H            | 2.800389  | -2.329037            | 6.219729  |         |
| Br           | -1.678783 | -1.738606            | 0.260288  |         |
| F            | -0.951112 | 3.267329             | -1.085349 |         |
| F            | -2.690531 | 5.057620             | -0.236917 |         |
| F            | -5.372247 | 4.715532             | -0.516860 |         |

| ARTICLE  |                                                 |           |           | Journal Name |
|----------|-------------------------------------------------|-----------|-----------|--------------|
| F        | -6.363277                                       | 2.468639  | -1.620728 |              |
| F        | -5.944943                                       | 0.198027  | -2.641159 |              |
| F        | -5.621041                                       | -2.148388 | -3.504017 |              |
| F        | -3.947849                                       | -4.096245 | -4.312815 |              |
| F        | -1.256537                                       | -3.738334 | -4.228629 |              |
| F        | -0.164398                                       | -1.493492 | -3.397183 |              |
| H        | 0.154127                                        | 0.591850  | -3.407974 |              |
| Compound | <b>2<sup>-</sup>-NO<sub>3</sub><sup>-</sup></b> |           |           |              |
| Atom     | X                                               | Y         | Z         |              |
| C        | -3.559552                                       | -2.872526 | -4.312074 |              |
| C        | -4.368908                                       | -1.834778 | -3.913822 |              |
| C        | -3.829204                                       | -0.669866 | -3.278756 |              |
| C        | -2.386888                                       | -0.555966 | -3.071912 |              |
| C        | -1.608088                                       | -1.694340 | -3.476069 |              |
| C        | -2.165205                                       | -2.801859 | -4.076311 |              |
| C        | -4.638134                                       | 0.390842  | -2.843156 |              |
| C        | -4.148574                                       | 1.511967  | -2.153651 |              |
| C        | -2.704683                                       | 1.612525  | -1.952317 |              |
| C        | -1.836737                                       | 0.621100  | -2.490693 |              |
| C        | -5.011147                                       | 2.542614  | -1.659000 |              |
| C        | -4.513053                                       | 3.620980  | -0.966001 |              |
| C        | -3.121814                                       | 3.712579  | -0.722419 |              |
| C        | -2.258980                                       | 2.746169  | -1.192089 |              |
| C        | -0.326187                                       | 0.823306  | -2.474779 |              |
| N        | 0.244927                                        | 0.263010  | -1.242041 |              |
| C        | 1.230555                                        | 0.803043  | -0.532575 |              |
| C        | 1.762146                                        | 0.460102  | 0.749890  |              |
| C        | 2.780320                                        | 1.548622  | 0.666167  |              |
| C        | 2.196106                                        | 1.915120  | -0.697332 |              |
| N        | 1.330419                                        | -0.508968 | 1.582403  |              |
| O        | 3.700816                                        | 1.989892  | 1.365750  |              |
| O        | 2.424038                                        | 2.773397  | -1.559031 |              |
| C        | 1.816443                                        | -0.897778 | 2.846360  |              |
| C        | 1.090862                                        | -1.892669 | 3.536787  |              |
| C        | 1.525548                                        | -2.331325 | 4.792656  |              |
| C        | 2.681137                                        | -1.786211 | 5.376376  |              |
| C        | 3.396630                                        | -0.795446 | 4.684103  |              |
| C        | 2.976997                                        | -0.347239 | 3.424265  |              |
| H        | 0.123685                                        | 0.349428  | -3.351826 |              |
| H        | -0.074260                                       | 1.881898  | -2.529511 |              |
| H        | -0.235211                                       | -0.548660 | -0.830642 |              |
| H        | 0.484336                                        | -1.009627 | 1.261944  |              |
| H        | 0.192004                                        | -2.316431 | 3.086195  |              |
| H        | 0.956009                                        | -3.101055 | 5.315626  |              |
| H        | 4.295922                                        | -0.362741 | 5.125823  |              |
| H        | 3.534845                                        | 0.426402  | 2.898619  |              |
| N        | -2.105887                                       | -1.296240 | 0.688356  |              |
| O        | -2.096818                                       | -0.205282 | 1.315387  |              |
| O        | -3.174520                                       | -1.890025 | 0.403945  |              |
| O        | -0.977941                                       | -1.818339 | 0.317662  |              |
| H        | 3.018372                                        | -2.128423 | 6.355402  |              |
| F        | -0.960406                                       | 2.908729  | -0.845096 |              |
| F        | -2.659636                                       | 4.747682  | 0.003501  |              |
| F        | -5.326662                                       | 4.584057  | -0.494939 |              |
| F        | -6.349001                                       | 2.487862  | -1.839721 |              |
| F        | -5.965317                                       | 0.323718  | -3.089608 |              |
| F        | -5.695681                                       | -1.965871 | -4.132178 |              |
| F        | -4.070028                                       | -3.969436 | -4.901621 |              |
| F        | -1.398396                                       | -3.854642 | -4.416357 |              |
| F        | -0.276866                                       | -1.773337 | -3.230221 |              |
| Compound | <b>3<sup>-</sup>-Cl<sup>-</sup></b>             |           |           |              |
| Atom     | X                                               | Y         | Z         |              |

|          |           |                             |           |
|----------|-----------|-----------------------------|-----------|
| C        | -3.688642 | -2.692810                   | -4.522299 |
| C        | -4.457566 | -1.682819                   | -3.984344 |
| C        | -3.851647 | -0.554348                   | -3.340457 |
| C        | -2.401115 | -0.463589                   | -3.265618 |
| C        | -1.645271 | -1.546341                   | -3.831936 |
| C        | -2.265686 | -2.621034                   | -4.437913 |
| C        | -4.638070 | 0.460050                    | -2.772027 |
| C        | -4.060478 | 1.561981                    | -2.120368 |
| C        | -2.612432 | 1.669530                    | -2.042516 |
| C        | -1.803098 | 0.660736                    | -2.633606 |
| C        | -4.877586 | 2.579043                    | -1.526686 |
| C        | -4.312413 | 3.653971                    | -0.873310 |
| C        | -2.892149 | 3.762996                    | -0.786937 |
| C        | -2.071172 | 2.806867                    | -1.353030 |
| C        | -0.291957 | 0.751761                    | -2.531440 |
| N        | 0.182250  | 0.130775                    | -1.278956 |
| C        | 0.856904  | 0.779933                    | -0.335764 |
| C        | 1.298066  | 0.421994                    | 0.971993  |
| C        | 1.898150  | 1.752596                    | 1.212561  |
| C        | 1.456827  | 2.142409                    | -0.199555 |
| N        | 1.135903  | -0.706309                   | 1.693854  |
| O        | 2.473695  | 2.310279                    | 2.154871  |
| O        | 1.523659  | 3.147733                    | -0.914693 |
| C        | 1.741968  | -0.929071                   | 2.942210  |
| C        | 0.967729  | -1.325847                   | 4.048157  |
| C        | 1.544342  | -1.582226                   | 5.295089  |
| C        | 2.925186  | -1.428451                   | 5.465267  |
| C        | 3.719386  | -1.038310                   | 4.380531  |
| C        | 3.131650  | -0.810637                   | 3.133079  |
| H        | 0.057055  | 1.787051                    | -2.542022 |
| H        | -0.161011 | -0.816755                   | -1.054062 |
| H        | 0.510423  | -1.445410                   | 1.304979  |
| F        | -0.370761 | -1.447190                   | 3.911190  |
| F        | 0.775119  | -1.951745                   | 6.340026  |
| F        | 5.054132  | -0.915922                   | 4.536634  |
| F        | 3.929680  | -0.504135                   | 2.089043  |
| F        | 3.488939  | -1.662808                   | 6.666564  |
| Cl       | -0.697699 | -2.716110                   | 0.082774  |
| H        | -0.994833 | 2.930649                    | -1.264325 |
| H        | -2.448327 | 4.613392                    | -0.267063 |
| H        | -4.943787 | 4.420360                    | -0.421826 |
| H        | -5.962255 | 2.479625                    | -1.600832 |
| H        | -5.726385 | 0.385673                    | -2.829575 |
| H        | -5.547309 | -1.726088                   | -4.033174 |
| H        | -4.160447 | -3.548678                   | -5.006691 |
| H        | -1.660666 | -3.428438                   | -4.852832 |
| H        | -0.558584 | -1.540011                   | -3.776672 |
| H        | 0.194692  | 0.252917                    | -3.377316 |
| Compound |           | $3^{\text{---}}\text{Br}^-$ |           |
| Atom     | X         | Y                           | Z         |
| C        | -3.568029 | -2.783202                   | -4.304634 |
| C        | -4.304893 | -1.877738                   | -3.571389 |
| C        | -3.695695 | -0.702621                   | -3.021421 |
| C        | -2.281787 | -0.450757                   | -3.251083 |
| C        | -1.558007 | -1.426570                   | -4.016877 |
| C        | -2.177334 | -2.551060                   | -4.524807 |
| C        | -4.447337 | 0.209781                    | -2.264719 |
| C        | -3.862988 | 1.354761                    | -1.698809 |
| C        | -2.449098 | 1.617750                    | -1.913858 |
| C        | -1.681557 | 0.713181                    | -2.697789 |
| C        | -4.638726 | 2.265329                    | -0.909332 |
| C        | -4.062085 | 3.378377                    | -0.334290 |

| ARTICLE  |           |                        |           | Journal Name |
|----------|-----------|------------------------|-----------|--------------|
| C        | -2.672221 | 3.635906               | -0.528925 |              |
| C        | -1.894261 | 2.787651               | -1.293213 |              |
| C        | -0.179796 | 0.898603               | -2.805395 |              |
| N        | 0.447315  | 0.218039               | -1.649856 |              |
| C        | 1.045014  | 0.862515               | -0.648465 |              |
| C        | 1.356584  | 0.491197               | 0.690926  |              |
| C        | 2.006106  | 1.789921               | 0.977252  |              |
| C        | 1.672400  | 2.204277               | -0.461403 |              |
| N        | 1.054830  | -0.613957              | 1.401961  |              |
| O        | 2.546441  | 2.313842               | 1.957920  |              |
| O        | 1.808370  | 3.214979               | -1.157775 |              |
| C        | 1.487872  | -0.839002              | 2.719666  |              |
| C        | 0.557383  | -1.072307              | 3.748274  |              |
| C        | 0.964193  | -1.306021              | 5.064703  |              |
| C        | 2.328708  | -1.313287              | 5.377712  |              |
| C        | 3.275544  | -1.082423              | 4.372593  |              |
| C        | 2.852494  | -0.871653              | 3.057441  |              |
| H        | 0.121452  | 1.948248               | -2.789365 |              |
| H        | 0.048961  | -0.707719              | -1.420817 |              |
| H        | 0.393994  | -1.300262              | 0.978454  |              |
| F        | -0.763661 | -1.037007              | 3.469204  |              |
| F        | 0.051005  | -1.513365              | 6.035690  |              |
| F        | 4.590752  | -1.103797              | 4.671848  |              |
| F        | 3.783902  | -0.703044              | 2.095388  |              |
| F        | 2.729470  | -1.537010              | 6.644500  |              |
| Br       | -0.916244 | -2.582700              | -0.336837 |              |
| H        | -0.840733 | 3.025410               | -1.418152 |              |
| H        | -2.217970 | 4.515295               | -0.069822 |              |
| H        | -4.661233 | 4.061833               | 0.268870  |              |
| H        | -5.700259 | 2.052540               | -0.768380 |              |
| H        | -5.508363 | 0.013926               | -2.094379 |              |
| H        | -5.369078 | -2.041218              | -3.390795 |              |
| H        | -4.040080 | -3.677014              | -4.714835 |              |
| H        | -1.594637 | -3.275041              | -5.096319 |              |
| H        | -0.492790 | -1.298756              | -4.197336 |              |
| H        | 0.220482  | 0.471408               | -3.730349 |              |
| Compound |           | $3^{-}\text{NO}_3^{-}$ |           |              |
| Atom     | X         | Y                      | Z         |              |
| C        | -3.585921 | -2.854670              | -4.112712 |              |
| C        | -4.356481 | -1.827077              | -3.611347 |              |
| C        | -3.753983 | -0.628300              | -3.107655 |              |
| C        | -2.307143 | -0.485207              | -3.138520 |              |
| C        | -1.548113 | -1.586476              | -3.662669 |              |
| C        | -2.164669 | -2.729276              | -4.132975 |              |
| C        | -4.538799 | 0.406315               | -2.574523 |              |
| C        | -3.961233 | 1.576341               | -2.055459 |              |
| C        | -2.515367 | 1.734384               | -2.079321 |              |
| C        | -1.710982 | 0.704860               | -2.638848 |              |
| C        | -4.776112 | 2.612817               | -1.493141 |              |
| C        | -4.210658 | 3.752258               | -0.960749 |              |
| C        | -2.792267 | 3.909063               | -0.969564 |              |
| C        | -1.973724 | 2.936855               | -1.511154 |              |
| C        | -0.198687 | 0.820949               | -2.617848 |              |
| N        | 0.336935  | 0.188124               | -1.395339 |              |
| C        | 0.918607  | 0.855178               | -0.402158 |              |
| C        | 1.288267  | 0.475964               | 0.918912  |              |
| C        | 1.841401  | 1.813240               | 1.228026  |              |
| C        | 1.471906  | 2.228224               | -0.202052 |              |
| N        | 1.095622  | -0.682714              | 1.586045  |              |
| O        | 2.348031  | 2.360690               | 2.213216  |              |
| O        | 1.553274  | 3.252015               | -0.887035 |              |
| C        | 1.645040  | -0.966988              | 2.845596  |              |



| Journal Name |           |                   | ARTICLE   |  |
|--------------|-----------|-------------------|-----------|--|
| C            | 0.837579  | -1.480327         | 3.877834  |  |
| C            | 1.361024  | -1.794137         | 5.134817  |  |
| C            | 2.720600  | -1.583958         | 5.392963  |  |
| C            | 3.548158  | -1.082202         | 4.381681  |  |
| C            | 3.015800  | -0.798162         | 3.121071  |  |
| H            | -4.055128 | -3.764708         | -4.488800 |  |
| H            | -5.444629 | -1.910356         | -3.581881 |  |
| H            | -0.461010 | -1.538165         | -3.686604 |  |
| H            | -1.557417 | -3.548858         | -4.519863 |  |
| H            | -5.624923 | 0.292990          | -2.551278 |  |
| H            | -5.859096 | 2.474963          | -1.490728 |  |
| H            | -4.840143 | 4.532579          | -0.530925 |  |
| H            | -2.347689 | 4.808842          | -0.541470 |  |
| H            | -0.898517 | 3.097549          | -1.492018 |  |
| H            | 0.250743  | 0.333143          | -3.490476 |  |
| H            | 0.140871  | 1.858396          | -2.632491 |  |
| H            | -0.005751 | -0.754642         | -1.167537 |  |
| H            | 0.452093  | -1.369199         | 1.145506  |  |
| N            | -1.789399 | -2.190113         | 0.123133  |  |
| O            | -2.227620 | -1.120787         | 0.617855  |  |
| O            | -2.547543 | -3.144807         | -0.174663 |  |
| O            | -0.514524 | -2.310325         | -0.090598 |  |
| F            | 3.853012  | -0.389999         | 2.144021  |  |
| F            | -0.482783 | -1.662942         | 3.656698  |  |
| F            | 0.558123  | -2.273946         | 6.106877  |  |
| F            | 3.232180  | -1.871743         | 6.606058  |  |
| F            | 4.865201  | -0.908274         | 4.617607  |  |
| Compound     |           | 4-Cl <sup>-</sup> |           |  |
| Atom         | X         | Y                 | Z         |  |
| C            | -4.558477 | 3.559533          | -0.216684 |  |
| C            | -5.052855 | 2.322230          | -0.556808 |  |
| C            | -4.336088 | 1.121781          | -0.245187 |  |
| C            | -3.068125 | 1.200170          | 0.477126  |  |
| C            | -2.591169 | 2.525744          | 0.760698  |  |
| C            | -3.305963 | 3.657859          | 0.437035  |  |
| C            | -4.811328 | -0.151595         | -0.595736 |  |
| C            | -4.102120 | -1.340364         | -0.358024 |  |
| C            | -2.837081 | -1.246542         | 0.367571  |  |
| C            | -2.380256 | 0.011964          | 0.850256  |  |
| C            | -4.583399 | -2.619158         | -0.786981 |  |
| C            | -3.865928 | -3.769088         | -0.553247 |  |
| C            | -2.617884 | -3.692200         | 0.110378  |  |
| C            | -2.124878 | -2.480720         | 0.544580  |  |
| C            | -1.211735 | 0.087210          | 1.823771  |  |
| N            | 0.070322  | 0.228036          | 1.118774  |  |
| C            | 1.217091  | -0.278756         | 1.556916  |  |
| C            | 2.539366  | -0.280651         | 1.028935  |  |
| C            | 3.064504  | -1.088962         | 2.151359  |  |
| C            | 1.651931  | -1.072124         | 2.746350  |  |
| N            | 3.043940  | 0.231095          | -0.114248 |  |
| O            | 4.156654  | -1.583199         | 2.454879  |  |
| O            | 1.097100  | -1.528698         | 3.749716  |  |
| C            | 4.412691  | 0.240535          | -0.431408 |  |
| C            | 4.857771  | -0.247919         | -1.673829 |  |
| C            | 6.208551  | -0.226024         | -2.031316 |  |
| C            | 7.155772  | 0.277245          | -1.131905 |  |
| C            | 6.739785  | 0.772525          | 0.109557  |  |
| C            | 5.382263  | 0.768648          | 0.442038  |  |
| F            | 3.961712  | -0.768271         | -2.541128 |  |
| F            | 6.606582  | -0.710244         | -3.225908 |  |
| F            | 7.648515  | 1.283906          | 0.965962  |  |
| F            | 5.002729  | 1.318415          | 1.614509  |  |

| ARTICLE  |           |                 |           | Journal Name |
|----------|-----------|-----------------|-----------|--------------|
| F        | 8.461865  | 0.292689        | -1.463190 |              |
| F        | -0.894315 | -2.519165       | 1.107834  |              |
| F        | -1.906080 | -4.821877       | 0.281214  |              |
| F        | -4.317335 | -4.968547       | -0.964343 |              |
| F        | -5.753173 | -2.744207       | -1.451535 |              |
| F        | -6.015586 | -0.238206       | -1.203385 |              |
| F        | -6.235174 | 2.285980        | -1.209655 |              |
| F        | -5.231325 | 4.686020        | -0.516372 |              |
| F        | -2.809910 | 4.880801        | 0.701934  |              |
| F        | -1.371720 | 2.741067        | 1.311974  |              |
| H        | -1.170325 | -0.809557       | 2.442207  |              |
| H        | -1.356503 | 0.928073        | 2.508979  |              |
| H        | 0.082615  | 0.741283        | 0.222428  |              |
| H        | 2.372669  | 0.634747        | -0.801056 |              |
| Cl       | 0.660353  | 1.494908        | -1.803816 |              |
| Compound |           | $4-\text{Br}^-$ |           |              |
| Atom     | X         | Y               | Z         |              |
| C        | -4.994943 | 3.499123        | 0.376916  |              |
| C        | -5.219946 | 2.315252        | -0.284309 |              |
| C        | -4.320294 | 1.207638        | -0.154876 |              |
| C        | -3.188945 | 1.293737        | 0.766590  |              |
| C        | -2.966279 | 2.587743        | 1.354906  |              |
| C        | -3.842555 | 3.637401        | 1.189334  |              |
| C        | -4.467581 | 0.026704        | -0.896508 |              |
| C        | -3.585844 | -1.063354       | -0.810801 |              |
| C        | -2.535416 | -1.013096       | 0.202304  |              |
| C        | -2.379804 | 0.150732        | 1.008818  |              |
| C        | -3.686586 | -2.193121       | -1.683591 |              |
| C        | -2.818646 | -3.254529       | -1.580543 |              |
| C        | -1.818796 | -3.242149       | -0.581152 |              |
| C        | -1.692339 | -2.173671       | 0.278805  |              |
| C        | -1.297220 | 0.189805        | 2.075327  |              |
| N        | -0.006038 | 0.455986        | 1.408218  |              |
| C        | 1.182974  | 0.128589        | 1.910881  |              |
| C        | 2.452143  | -0.058879       | 1.298377  |              |
| C        | 3.108668  | -0.376273       | 2.587955  |              |
| C        | 1.738391  | -0.179209       | 3.259861  |              |
| N        | 2.815810  | -0.043193       | -0.002771 |              |
| O        | 4.244823  | -0.697012       | 2.949949  |              |
| O        | 1.277719  | -0.276292       | 4.399702  |              |
| C        | 4.138840  | -0.184025       | -0.451122 |              |
| C        | 4.474501  | -1.163418       | -1.403920 |              |
| C        | 5.783972  | -1.316849       | -1.867292 |              |
| C        | 6.794898  | -0.478512       | -1.382386 |              |
| C        | 6.486909  | 0.506986        | -0.437059 |              |
| C        | 5.169067  | 0.660327        | 0.001706  |              |
| F        | 3.517909  | -2.002912       | -1.857490 |              |
| F        | 6.081012  | -2.276382       | -2.767638 |              |
| F        | 7.456124  | 1.328600        | 0.015998  |              |
| F        | 4.886428  | 1.657601        | 0.866454  |              |
| F        | 8.060482  | -0.621566       | -1.822362 |              |
| F        | -0.678724 | -2.277445       | 1.171808  |              |
| F        | -0.974581 | -4.288362       | -0.499040 |              |
| F        | -2.899046 | -4.307731       | -2.415701 |              |
| F        | -4.623607 | -2.251478       | -2.656212 |              |
| F        | -5.507280 | -0.060429       | -1.756661 |              |
| F        | -6.314145 | 2.243450        | -1.074325 |              |
| F        | -5.837387 | 4.541706        | 0.250597  |              |
| F        | -3.595331 | 4.832656        | 1.758993  |              |
| F        | -1.855402 | 2.866972        | 2.080597  |              |
| H        | -1.252038 | -0.766056       | 2.602503  |              |
| H        | -1.502081 | 0.953011        | 2.825175  |              |

|          |   |           |                                              |           |
|----------|---|-----------|----------------------------------------------|-----------|
| H        |   | -0.055583 | 0.520394                                     | 0.378098  |
| H        |   | 2.057651  | -0.039767                                    | -0.714855 |
| Br       |   | 0.074165  | 0.107687                                     | -1.908039 |
| Compound |   |           | 4 <sup>-</sup> -NO <sub>3</sub> <sup>-</sup> |           |
| Atom     | X |           | Y                                            | Z         |
| C        |   | -3.406444 | -2.786850                                    | -4.712644 |
| C        |   | -4.246110 | -1.781692                                    | -4.293723 |
| C        |   | -3.758557 | -0.674398                                    | -3.526900 |
| C        |   | -2.334308 | -0.577221                                    | -3.216469 |
| C        |   | -1.527207 | -1.689095                                    | -3.637603 |
| C        |   | -2.034727 | -2.744392                                    | -4.362586 |
| C        |   | -4.600838 | 0.343098                                     | -3.053716 |
| C        |   | -4.161305 | 1.406605                                     | -2.248390 |
| C        |   | -2.729467 | 1.509531                                     | -1.974153 |
| C        |   | -1.825357 | 0.559863                                     | -2.528439 |
| C        |   | -5.062890 | 2.379822                                     | -1.709367 |
| C        |   | -4.613104 | 3.412071                                     | -0.919798 |
| C        |   | -3.233101 | 3.514067                                     | -0.623643 |
| C        |   | -2.334195 | 2.600208                                     | -1.129017 |
| C        |   | -0.319023 | 0.769754                                     | -2.429221 |
| N        |   | 0.206822  | 0.170716                                     | -1.192704 |
| C        |   | 1.113501  | 0.728338                                     | -0.396652 |
| C        |   | 1.560631  | 0.391207                                     | 0.909848  |
| C        |   | 2.515427  | 1.521309                                     | 0.954976  |
| C        |   | 2.050800  | 1.888426                                     | -0.463611 |
| N        |   | 1.141100  | -0.576200                                    | 1.756297  |
| O        |   | 3.309491  | 1.982690                                     | 1.780955  |
| O        |   | 2.304378  | 2.768759                                     | -1.288864 |
| C        |   | 1.768438  | -0.880216                                    | 2.973974  |
| C        |   | 1.014944  | -1.000807                                    | 4.156648  |
| C        |   | 1.609674  | -1.326569                                    | 5.378372  |
| C        |   | 2.993531  | -1.525226                                    | 5.445902  |
| C        |   | 3.766137  | -1.417512                                    | 4.283648  |
| C        |   | 3.153605  | -1.117929                                    | 3.063740  |
| H        |   | 0.176956  | 0.332873                                     | -3.300119 |
| H        |   | -0.075518 | 1.831848                                     | -2.432542 |
| H        |   | -0.284074 | -0.650289                                    | -0.819380 |
| H        |   | 0.253728  | -1.056097                                    | 1.509939  |
| N        |   | -2.269118 | -1.170740                                    | 0.663682  |
| O        |   | -2.286436 | -0.036321                                    | 1.204694  |
| O        |   | -3.318178 | -1.732800                                    | 0.264211  |
| O        |   | -1.131647 | -1.774753                                    | 0.498803  |
| F        |   | -1.050898 | 2.770606                                     | -0.734182 |
| F        |   | -2.817166 | 4.506255                                     | 0.185612  |
| F        |   | -5.463740 | 4.320000                                     | -0.406478 |
| F        |   | -6.392301 | 2.312949                                     | -1.941940 |
| F        |   | -5.911113 | 0.289627                                     | -3.380540 |
| F        |   | -5.552031 | -1.888113                                    | -4.622848 |
| F        |   | -3.868167 | -3.829155                                    | -5.428171 |
| F        |   | -1.245124 | -3.775233                                    | -4.717299 |
| F        |   | -0.222660 | -1.796898                                    | -3.281861 |
| F        |   | -0.318075 | -0.782794                                    | 4.117329  |
| F        |   | 0.860639  | -1.424843                                    | 6.495999  |
| F        |   | 3.577962  | -1.827862                                    | 6.622004  |
| F        |   | 5.096016  | -1.638423                                    | 4.339651  |
| F        |   | 3.913228  | -1.095611                                    | 1.948066  |
| Compound |   |           | 5 <sup>-</sup> -Cl <sup>-</sup>              |           |
| Atom     | X |           | Y                                            | Z         |
| C        |   | -3.740165 | -2.652761                                    | -4.413938 |
| C        |   | -4.500267 | -1.520836                                    | -4.162249 |
| C        |   | -3.960398 | -0.405565                                    | -3.430493 |
| C        |   | -2.574251 | -0.447393                                    | -2.965970 |

|          |           |                                |           |
|----------|-----------|--------------------------------|-----------|
| C        | -1.866364 | -1.679135                      | -3.181960 |
| C        | -2.425763 | -2.734978                      | -3.895962 |
| C        | -4.726787 | 0.750580                       | -3.163625 |
| C        | -4.239603 | 1.826421                       | -2.383059 |
| C        | -2.831382 | 1.810933                       | -1.988794 |
| C        | -2.003075 | 0.710736                       | -2.353708 |
| C        | -5.075728 | 2.932969                       | -2.021030 |
| C        | -4.569568 | 4.021569                       | -1.344088 |
| C        | -3.199335 | 4.037757                       | -0.990744 |
| C        | -2.366614 | 2.958869                       | -1.244307 |
| C        | -0.489077 | 0.821161                       | -2.253674 |
| N        | 0.035754  | 0.355519                       | -0.957452 |
| C        | 1.114516  | 0.834545                       | -0.358441 |
| C        | 1.791781  | 0.450735                       | 0.845260  |
| C        | 2.793879  | 1.539106                       | 0.687161  |
| C        | 2.087134  | 1.931948                       | -0.604876 |
| N        | 1.493912  | -0.578726                      | 1.668967  |
| O        | 3.783111  | 1.968146                       | 1.300481  |
| O        | 2.271109  | 2.781109                       | -1.485854 |
| C        | 2.103763  | -0.978748                      | 2.875191  |
| C        | 1.607423  | -2.148355                      | 3.491180  |
| C        | 2.162789  | -2.594814                      | 4.695684  |
| C        | 3.215236  | -1.887630                      | 5.300487  |
| C        | 3.703826  | -0.725618                      | 4.681090  |
| C        | 3.158046  | -0.263059                      | 3.475729  |
| H        | -0.168498 | 1.855323                       | -2.383330 |
| H        | -0.423143 | -0.460590                      | -0.536185 |
| H        | 0.726867  | -1.190379                      | 1.351695  |
| H        | 0.790999  | -2.699011                      | 3.021343  |
| H        | 1.769551  | -3.500031                      | 5.160994  |
| H        | 4.521417  | -0.166085                      | 5.139070  |
| H        | 3.549327  | 0.635260                       | 3.000107  |
| H        | 3.647005  | -2.236764                      | 6.239170  |
| Cl       | -0.901647 | -2.496776                      | 0.340011  |
| O        | -1.094637 | 2.999727                       | -0.735974 |
| H        | -1.034804 | 3.815807                       | -0.196665 |
| O        | -2.730972 | 5.096149                       | -0.203990 |
| H        | -2.363993 | 5.796483                       | -0.778990 |
| O        | -5.413981 | 5.055018                       | -1.020299 |
| H        | -4.917577 | 5.684630                       | -0.459479 |
| O        | -6.438474 | 2.877182                       | -2.310268 |
| H        | -6.833550 | 3.763062                       | -2.197933 |
| O        | -5.985885 | 0.795223                       | -3.726469 |
| H        | -6.476373 | 1.586496                       | -3.393273 |
| O        | -5.788860 | -1.592011                      | -4.646062 |
| H        | -6.235475 | -0.736156                      | -4.446719 |
| O        | -4.250659 | -3.723321                      | -5.106369 |
| H        | -5.169600 | -3.491347                      | -5.350525 |
| O        | -1.726739 | -3.895555                      | -4.070217 |
| H        | -0.862982 | -3.733231                      | -3.625255 |
| O        | -0.586587 | -1.949028                      | -2.696387 |
| H        | -0.656294 | -2.185298                      | -1.725776 |
| H        | -0.031214 | 0.222626                       | -3.048079 |
| Compound |           | 5 <sup>-</sup> Br <sup>-</sup> |           |
| Atom     | X         | Y                              | Z         |
| C        | -3.624903 | -2.657632                      | -4.381723 |
| C        | -4.420275 | -1.545960                      | -4.148682 |
| C        | -3.927262 | -0.417865                      | -3.404150 |
| C        | -2.554721 | -0.429669                      | -2.902522 |
| C        | -1.824750 | -1.655030                      | -3.070143 |
| C        | -2.318581 | -2.704566                      | -3.837798 |
| C        | -4.720708 | 0.726236                       | -3.167162 |

|          |           |                                              |           |
|----------|-----------|----------------------------------------------|-----------|
| C        | -4.270939 | 1.817292                                     | -2.385038 |
| C        | -2.867292 | 1.839923                                     | -1.975399 |
| C        | -2.012285 | 0.753640                                     | -2.314894 |
| C        | -5.137847 | 2.905060                                     | -2.040667 |
| C        | -4.664643 | 4.011759                                     | -1.369024 |
| C        | -3.297575 | 4.066688                                     | -1.006176 |
| C        | -2.434749 | 3.008022                                     | -1.243604 |
| C        | -0.502473 | 0.903841                                     | -2.216715 |
| N        | 0.017974  | 0.477979                                     | -0.907885 |
| C        | 1.159704  | 0.868312                                     | -0.367146 |
| C        | 1.845396  | 0.446518                                     | 0.818672  |
| C        | 2.934449  | 1.436473                                     | 0.601259  |
| C        | 2.216178  | 1.866698                                     | -0.674347 |
| N        | 1.477523  | -0.530467                                    | 1.676270  |
| O        | 3.978205  | 1.786513                                     | 1.172837  |
| O        | 2.432297  | 2.685383                                     | -1.577261 |
| C        | 2.101993  | -0.993214                                    | 2.851221  |
| C        | 1.497876  | -2.086362                                    | 3.509875  |
| C        | 2.062232  | -2.590815                                    | 4.686548  |
| C        | 3.226407  | -2.015367                                    | 5.222714  |
| C        | 3.819840  | -0.926988                                    | 4.562312  |
| C        | 3.268379  | -0.409374                                    | 3.382106  |
| H        | -0.207776 | 1.942755                                     | -2.373861 |
| H        | -0.515245 | -0.256478                                    | -0.425532 |
| H        | 0.626377  | -1.051034                                    | 1.413642  |
| H        | 0.594125  | -2.532872                                    | 3.092354  |
| H        | 1.587601  | -3.436983                                    | 5.185870  |
| H        | 4.724403  | -0.470085                                    | 4.967526  |
| H        | 3.737369  | 0.432214                                     | 2.873590  |
| H        | 3.664019  | -2.409444                                    | 6.140678  |
| Br       | -1.341630 | -2.168046                                    | 0.584831  |
| O        | -1.165994 | 3.088666                                     | -0.729444 |
| H        | -1.135169 | 3.908959                                     | -0.193746 |
| O        | -2.862388 | 5.143874                                     | -0.226043 |
| H        | -2.510581 | 5.848672                                     | -0.805021 |
| O        | -5.537536 | 5.026483                                     | -1.061667 |
| H        | -5.061677 | 5.675294                                     | -0.504939 |
| O        | -6.495628 | 2.812097                                     | -2.343400 |
| H        | -6.912246 | 3.690187                                     | -2.248745 |
| O        | -5.967291 | 0.742704                                     | -3.759065 |
| H        | -6.481878 | 1.523200                                     | -3.437151 |
| O        | -5.696531 | -1.650203                                    | -4.658709 |
| H        | -6.166475 | -0.803517                                    | -4.474898 |
| O        | -4.088757 | -3.737061                                    | -5.093138 |
| H        | -5.006399 | -3.527329                                    | -5.361080 |
| O        | -1.584570 | -3.844868                                    | -4.003294 |
| H        | -0.743054 | -3.670603                                    | -3.522250 |
| O        | -0.552602 | -1.894524                                    | -2.547535 |
| H        | -0.664546 | -2.073826                                    | -1.571683 |
| H        | -0.028247 | 0.296628                                     | -2.995616 |
| Compound |           | 5 <sup>-</sup> -NO <sub>3</sub> <sup>-</sup> |           |
| Atom     | X         | Y                                            | Z         |
| C        | -3.320715 | -2.511136                                    | -5.062001 |
| C        | -4.200708 | -1.491305                                    | -4.726952 |
| C        | -3.823314 | -0.464745                                    | -3.796622 |
| C        | -2.475352 | -0.466886                                    | -3.233531 |
| C        | -1.637874 | -1.585225                                    | -3.556017 |
| C        | -2.046656 | -2.571507                                    | -4.449383 |
| C        | -4.708720 | 0.571280                                     | -3.415911 |
| C        | -4.384522 | 1.525905                                     | -2.422017 |
| C        | -3.020372 | 1.539015                                     | -1.899495 |
| C        | -2.063222 | 0.614242                                     | -2.397002 |

|          |           |                   |           |
|----------|-----------|-------------------|-----------|
| C        | -5.338115 | 2.479819          | -1.936501 |
| C        | -4.995459 | 3.407744          | -0.975983 |
| C        | -3.680761 | 3.415564          | -0.448002 |
| C        | -2.731853 | 2.495296          | -0.857617 |
| C        | -0.584491 | 0.862075          | -2.176533 |
| N        | -0.058468 | 0.077401          | -1.021720 |
| C        | 1.251761  | 0.130657          | -0.694283 |
| C        | 1.955877  | -0.157233         | 0.512528  |
| C        | 3.274441  | 0.112497          | -0.156543 |
| C        | 2.493938  | 0.410808          | -1.440877 |
| N        | 1.455082  | -0.487785         | 1.714827  |
| O        | 4.466214  | 0.107768          | 0.156644  |
| O        | 2.787718  | 0.746115          | -2.593952 |
| C        | 2.120710  | -0.798593         | 2.919338  |
| C        | 1.314519  | -1.015101         | 4.057606  |
| C        | 1.906819  | -1.341325         | 5.282934  |
| C        | 3.302704  | -1.453266         | 5.391403  |
| C        | 4.098246  | -1.235265         | 4.254787  |
| C        | 3.520811  | -0.911526         | 3.019473  |
| H        | -0.014304 | 0.563614          | -3.061962 |
| H        | -0.394360 | 1.924713          | -2.006985 |
| H        | -0.707876 | 0.004777          | -0.227254 |
| H        | 0.418330  | -0.483477         | 1.772033  |
| H        | 0.231070  | -0.923592         | 3.976232  |
| H        | 1.272480  | -1.506219         | 6.155117  |
| H        | 5.184075  | -1.319391         | 4.324150  |
| H        | 4.148304  | -0.739672         | 2.146832  |
| N        | -1.988667 | 0.469907          | 2.098697  |
| O        | -1.283878 | 1.353586          | 2.657316  |
| O        | -3.241840 | 0.532449          | 2.092088  |
| O        | -1.404620 | -0.525027         | 1.515587  |
| H        | 3.763069  | -1.707183         | 6.346871  |
| O        | -0.385408 | -1.834204         | -3.015321 |
| H        | -0.295412 | -1.414898         | -2.122719 |
| O        | -1.245273 | -3.648772         | -4.719975 |
| H        | -0.448156 | -3.542417         | -4.158489 |
| O        | -3.678238 | -3.507015         | -5.937304 |
| H        | -4.593458 | -3.315626         | -6.226208 |
| O        | -5.437579 | -1.592375         | -5.331170 |
| H        | -5.976372 | -0.818273         | -5.047878 |
| O        | -5.922555 | 0.604439          | -4.070077 |
| H        | -6.514219 | 1.277379          | -3.657426 |
| O        | -6.640601 | 2.441705          | -2.421329 |
| H        | -7.170720 | 3.143399          | -1.996893 |
| O        | -5.951662 | 4.292263          | -0.539191 |
| H        | -5.566661 | 4.804730          | 0.200665  |
| O        | -3.426788 | 4.262242          | 0.633417  |
| H        | -2.907801 | 5.034148          | 0.333321  |
| O        | -1.522228 | 2.460431          | -0.206978 |
| H        | -1.625425 | 2.939405          | 0.641201  |
| Compound |           | 6-Cl <sup>-</sup> |           |
| Atom     | X         | Y                 | Z         |
| C        | -3.588978 | -2.788946         | -4.341411 |
| C        | -4.381807 | -1.810218         | -3.780844 |
| C        | -3.804007 | -0.642345         | -3.183270 |
| C        | -2.358258 | -0.477184         | -3.181320 |
| C        | -1.575992 | -1.529162         | -3.769078 |
| C        | -2.169213 | -2.643822         | -4.328317 |
| C        | -4.612611 | 0.339783          | -2.589799 |
| C        | -4.061562 | 1.478553          | -1.979893 |
| C        | -2.618853 | 1.660017          | -1.973474 |
| C        | -1.789586 | 0.685364          | -2.593142 |

|          |           |                 |           |
|----------|-----------|-----------------|-----------|
| C        | -4.900152 | 2.460812        | -1.358377 |
| C        | -4.359658 | 3.570763        | -0.743909 |
| C        | -2.944194 | 3.751521        | -0.726537 |
| C        | -2.103236 | 2.830903        | -1.321482 |
| C        | -0.282623 | 0.852684        | -2.565179 |
| N        | 0.276562  | 0.262024        | -1.331366 |
| C        | 0.978112  | 0.940397        | -0.433710 |
| C        | 1.524710  | 0.588887        | 0.847979  |
| C        | 2.124880  | 1.924006        | 1.003405  |
| C        | 1.516355  | 2.325947        | -0.321791 |
| N        | 1.454478  | -0.567119       | 1.526863  |
| O        | 2.869478  | 2.471896        | 1.848682  |
| O        | 1.475990  | 3.349495        | -1.016762 |
| C        | 1.772360  | -0.825503       | 2.889301  |
| C        | 0.837806  | -1.571567       | 3.657225  |
| C        | 1.136917  | -1.885163       | 4.997479  |
| C        | 2.342386  | -1.456811       | 5.573973  |
| C        | 3.257582  | -0.718369       | 4.817260  |
| C        | 2.986530  | -0.406651       | 3.477075  |
| H        | -4.039064 | -3.675615       | -4.789688 |
| H        | -5.468970 | -1.909246       | -3.775370 |
| H        | -0.489608 | -1.466844       | -3.768606 |
| H        | -1.544403 | -3.426317       | -4.761262 |
| H        | -5.697086 | 0.209640        | -2.592788 |
| H        | -5.980620 | 2.305946        | -1.379100 |
| H        | -5.006800 | 4.310250        | -0.270425 |
| H        | -2.519887 | 4.629124        | -0.236379 |
| H        | -1.031331 | 3.009561        | -1.284306 |
| H        | 0.190158  | 0.371079        | -3.428545 |
| H        | 0.016137  | 1.903130        | -2.593805 |
| H        | -0.019970 | -0.695007       | -1.089598 |
| H        | 0.929975  | -1.313195       | 1.039859  |
| Cl       | -0.496107 | -2.636495       | 0.099528  |
| O        | -0.394277 | -1.972009       | 3.197678  |
| H        | -0.411423 | -2.113212       | 2.215317  |
| O        | 0.222219  | -2.604528       | 5.736052  |
| H        | 0.592232  | -2.719531       | 6.632880  |
| O        | 2.563118  | -1.790792       | 6.894637  |
| H        | 3.436701  | -1.447865       | 7.163105  |
| O        | 4.430516  | -0.317844       | 5.419593  |
| H        | 4.926241  | 0.182980        | 4.736644  |
| O        | 3.984535  | 0.267661        | 2.801363  |
| H        | 3.636854  | 1.168412        | 2.512993  |
| Compound |           | $6\text{-Br}^-$ |           |
| Atom     | X         | Y               | Z         |
| C        | -3.447456 | -2.847748       | -4.180116 |
| C        | -4.134816 | -2.050899       | -3.289749 |
| C        | -3.543854 | -0.860051       | -2.754530 |
| C        | -2.205985 | -0.470824       | -3.171805 |
| C        | -1.529843 | -1.338309       | -4.094720 |
| C        | -2.126939 | -2.484381       | -4.580584 |
| C        | -4.227264 | -0.081827       | -1.808212 |
| C        | -3.647017 | 1.063865        | -1.239359 |
| C        | -2.316558 | 1.474219        | -1.656337 |
| C        | -1.618017 | 0.701990        | -2.625019 |
| C        | -4.342270 | 1.825090        | -0.244146 |
| C        | -3.763775 | 2.934467        | 0.336402  |
| C        | -2.456833 | 3.341937        | -0.064756 |
| C        | -1.759661 | 2.638795        | -1.028538 |
| C        | -0.158262 | 1.007691        | -2.904135 |
| N        | 0.629313  | 0.342618        | -1.836022 |
| C        | 1.270369  | 1.002825        | -0.875121 |

| ARTICLE  |                        |           |           | Journal Name |
|----------|------------------------|-----------|-----------|--------------|
| C        | 1.662423               | 0.628472  | 0.451173  |              |
| C        | 2.345670               | 1.915286  | 0.662213  |              |
| C        | 1.869751               | 2.357892  | -0.710903 |              |
| N        | 1.408301               | -0.490924 | 1.148487  |              |
| O        | 3.052797               | 2.404175  | 1.570882  |              |
| O        | 1.924761               | 3.388659  | -1.391503 |              |
| C        | 1.489048               | -0.675174 | 2.558750  |              |
| C        | 0.348007               | -1.188456 | 3.231433  |              |
| C        | 0.415805               | -1.419199 | 4.619530  |              |
| C        | 1.588466               | -1.127271 | 5.332943  |              |
| C        | 2.701595               | -0.601474 | 4.668876  |              |
| C        | 2.661101               | -0.375923 | 3.285585  |              |
| H        | -3.903286              | -3.756733 | -4.574995 |              |
| H        | -5.141688              | -2.319322 | -2.964013 |              |
| H        | -0.516283              | -1.109871 | -4.417544 |              |
| H        | -1.579643              | -3.123954 | -5.274669 |              |
| H        | -5.222151              | -0.392630 | -1.481285 |              |
| H        | -5.342217              | 1.500304  | 0.050107  |              |
| H        | -4.299251              | 3.502203  | 1.098484  |              |
| H        | -2.002048              | 4.221201  | 0.394046  |              |
| H        | -0.770366              | 2.991499  | -1.309331 |              |
| H        | 0.168587               | 0.630478  | -3.877228 |              |
| H        | 0.069241               | 2.075972  | -2.885552 |              |
| H        | 0.267835               | -0.588596 | -1.573976 |              |
| H        | 0.847792               | -1.193959 | 0.640110  |              |
| Br       | -0.771105              | -2.425307 | -0.464999 |              |
| O        | -0.875169              | -1.403489 | 2.642677  |              |
| H        | -0.807746              | -1.659930 | 1.684781  |              |
| O        | -0.694943              | -1.910436 | 5.271026  |              |
| H        | -0.469080              | -1.993211 | 6.217928  |              |
| O        | 1.575893               | -1.367620 | 6.691862  |              |
| H        | 2.447478               | -1.129216 | 7.061061  |              |
| O        | 3.828510               | -0.315240 | 5.408396  |              |
| H        | 4.482006               | 0.051569  | 4.775190  |              |
| O        | 3.820212               | 0.111003  | 2.710473  |              |
| H        | 3.631122               | 1.029239  | 2.346086  |              |
| Compound | $6^{-}\text{NO}_3^{-}$ |           |           |              |
| Atom     | X                      | Y         | Z         |              |
| C        | -3.522754              | -2.733493 | -4.677929 |              |
| C        | -4.327369              | -1.802821 | -4.056020 |              |
| C        | -3.763578              | -0.679916 | -3.366591 |              |
| C        | -2.319155              | -0.504672 | -3.339003 |              |
| C        | -1.524199              | -1.507125 | -3.992649 |              |
| C        | -2.104192              | -2.582037 | -4.637119 |              |
| C        | -4.585438              | 0.242388  | -2.700915 |              |
| C        | -4.049552              | 1.331776  | -1.994979 |              |
| C        | -2.609999              | 1.530220  | -1.972284 |              |
| C        | -1.766548              | 0.615839  | -2.661249 |              |
| C        | -4.900413              | 2.247158  | -1.293600 |              |
| C        | -4.374120              | 3.309473  | -0.589000 |              |
| C        | -2.961684              | 3.510165  | -0.561170 |              |
| C        | -2.109925              | 2.653332  | -1.231260 |              |
| C        | -0.262510              | 0.800819  | -2.602854 |              |
| N        | 0.273068               | 0.206603  | -1.359880 |              |
| C        | 0.924900               | 0.887957  | -0.426719 |              |
| C        | 1.390181               | 0.551171  | 0.889996  |              |
| C        | 2.056103               | 1.858925  | 1.028804  |              |
| C        | 1.507196               | 2.255036  | -0.324175 |              |
| N        | 1.217996               | -0.561720 | 1.620287  |              |
| O        | 2.819735               | 2.381883  | 1.871718  |              |
| O        | 1.527449               | 3.263577  | -1.041645 |              |
| C        | 1.614116               | -0.797017 | 2.966859  |              |



| Journal Name |           |                 |           | ARTICLE |
|--------------|-----------|-----------------|-----------|---------|
| C            | 0.677345  | -1.414544       | 3.835222  |         |
| C            | 1.069216  | -1.769437       | 5.141428  |         |
| C            | 2.364974  | -1.483087       | 5.593728  |         |
| C            | 3.275344  | -0.837067       | 4.749797  |         |
| C            | 2.911348  | -0.495452       | 3.440771  |         |
| H            | 0.236232  | 0.333860        | -3.458555 |         |
| H            | 0.022997  | 1.855811        | -2.613891 |         |
| H            | -0.027041 | -0.746941       | -1.128185 |         |
| H            | 0.622473  | -1.280466       | 1.175705  |         |
| N            | -1.807795 | -1.866966       | 0.343990  |         |
| O            | -2.001965 | -1.000653       | 1.257571  |         |
| O            | -2.762065 | -2.377744       | -0.273088 |         |
| O            | -0.596905 | -2.201678       | 0.057959  |         |
| H            | -0.438163 | -1.439462       | -3.976420 |         |
| H            | -1.469521 | -3.327716       | -5.118132 |         |
| H            | -3.962255 | -3.587579       | -5.194777 |         |
| H            | -5.413842 | -1.908789       | -4.068279 |         |
| H            | -5.668298 | 0.100239        | -2.718768 |         |
| H            | -5.978678 | 2.079671        | -1.326631 |         |
| H            | -5.030372 | 3.997377        | -0.054294 |         |
| H            | -2.548515 | 4.352256        | -0.003866 |         |
| H            | -1.041334 | 2.847390        | -1.187519 |         |
| O            | 3.900763  | 0.083541        | 2.668393  |         |
| H            | 3.609357  | 1.016169        | 2.435121  |         |
| O            | -0.605045 | -1.734667       | 3.479794  |         |
| H            | -0.904431 | -1.300604       | 2.637870  |         |
| O            | 0.152483  | -2.383791       | 5.967591  |         |
| H            | 0.584920  | -2.531570       | 6.830899  |         |
| O            | 2.674287  | -1.840448       | 6.889950  |         |
| H            | 3.594578  | -1.574295       | 7.077157  |         |
| O            | 4.531228  | -0.551963       | 5.242025  |         |
| H            | 5.011030  | -0.102090       | 4.514096  |         |
| Compound     |           | $7\text{-Cl}^-$ |           |         |
| Atom         | X         | Y               | Z         |         |
| C            | -3.504541 | -2.635370       | -4.580254 |         |
| C            | -4.334191 | -1.564342       | -4.284376 |         |
| C            | -3.867173 | -0.450352       | -3.502082 |         |
| C            | -2.483988 | -0.429007       | -3.029015 |         |
| C            | -1.703419 | -1.605236       | -3.290051 |         |
| C            | -2.189775 | -2.660312       | -4.056221 |         |
| C            | -4.702226 | 0.647134        | -3.195886 |         |
| C            | -4.286876 | 1.710932        | -2.358918 |         |
| C            | -2.885203 | 1.757278        | -1.947054 |         |
| C            | -1.986543 | 0.733264        | -2.363177 |         |
| C            | -5.188215 | 2.749702        | -1.955894 |         |
| C            | -4.753104 | 3.827695        | -1.214831 |         |
| C            | -3.392360 | 3.898426        | -0.832108 |         |
| C            | -2.497862 | 2.882172        | -1.129332 |         |
| C            | -0.482089 | 0.946776        | -2.273854 |         |
| N            | 0.100696  | 0.432139        | -1.021879 |         |
| C            | 1.094169  | 0.975795        | -0.344439 |         |
| C            | 1.768351  | 0.544165        | 0.848185  |         |
| C            | 2.638065  | 1.724332        | 0.843676  |         |
| C            | 1.944240  | 2.203419        | -0.416162 |         |
| N            | 1.588157  | -0.584099       | 1.561741  |         |
| O            | 3.589785  | 2.135615        | 1.551306  |         |
| O            | 2.058843  | 3.166810        | -1.180632 |         |
| C            | 1.996123  | -0.884563       | 2.890556  |         |
| C            | 1.034111  | -1.468043       | 3.757994  |         |
| C            | 1.399603  | -1.810235       | 5.073362  |         |
| C            | 2.704835  | -1.567799       | 5.529075  |         |
| C            | 3.649764  | -0.992222       | 4.674386  |         |

| ARTICLE  |           |   |                         | Journal Name |
|----------|-----------|---|-------------------------|--------------|
| C        | 3.310940  |   | -0.658324               | 3.354031     |
| H        | -0.235829 |   | 2.007494                | -2.336493    |
| H        | -0.297738 |   | -0.438159               | -0.653250    |
| H        | 0.929434  |   | -1.251724               | 1.137294     |
| Cl       | -0.734865 |   | -2.486201               | 0.290790     |
| O        | -1.240186 |   | 2.952891                | -0.590572    |
| H        | -1.226781 |   | 3.739205                | -0.006138    |
| O        | -2.997759 |   | 4.932220                | 0.023665     |
| H        | -2.656113 |   | 5.682220                | -0.502132    |
| O        | -5.659169 |   | 4.795290                | -0.856454    |
| H        | -5.210310 |   | 5.421797                | -0.253638    |
| O        | -6.540114 |   | 2.635517                | -2.273985    |
| H        | -6.988652 |   | 3.487034                | -2.108607    |
| O        | -5.953660 |   | 0.646050                | -3.775252    |
| H        | -6.493654 |   | 1.391430                | -3.414374    |
| O        | -5.614017 |   | -1.693803               | -4.776842    |
| H        | -6.111730 |   | -0.873819               | -4.549852    |
| O        | -3.944419 |   | -3.703918               | -5.321840    |
| H        | -4.874233 |   | -3.518487               | -5.564535    |
| O        | -1.422335 |   | -3.767736               | -4.277249    |
| H        | -0.567838 |   | -3.577225               | -3.827283    |
| O        | -0.413095 |   | -1.815957               | -2.795176    |
| H        | -0.481385 |   | -2.122017               | -1.851514    |
| O        | 4.340790  |   | -0.171677               | 2.576282     |
| H        | 4.118822  |   | 0.759257                | 2.250441     |
| O        | 4.922449  |   | -0.777855               | 5.157307     |
| H        | 5.424601  |   | -0.371429               | 4.418448     |
| O        | 2.991880  |   | -1.916905               | 6.833054     |
| H        | 3.930810  |   | -1.718433               | 7.011370     |
| O        | 0.455924  |   | -2.369795               | 5.907502     |
| H        | 0.884785  |   | -2.534757               | 6.769657     |
| O        | -0.284358 |   | -1.675832               | 3.416265     |
| H        | -0.400795 |   | -1.837930               | 2.450357     |
| H        | 0.004134  |   | 0.435572                | -3.111623    |
| Compound |           |   | <b>7-Br<sup>-</sup></b> |              |
| Atom     | X         | Y | Z                       |              |
| C        | -3.417761 |   | -2.599887               | -4.654071    |
| C        | -4.276748 |   | -1.565550               | -4.314130    |
| C        | -3.835785 |   | -0.466355               | -3.497008    |
| C        | -2.452939 |   | -0.427978               | -3.026767    |
| C        | -1.651747 |   | -1.584844               | -3.307337    |
| C        | -2.096654 |   | -2.602661               | -4.144389    |
| C        | -4.692262 |   | 0.604221                | -3.157682    |
| C        | -4.293741 |   | 1.654586                | -2.295746    |
| C        | -2.887171 |   | 1.729433                | -1.905211    |
| C        | -1.971388 |   | 0.738068                | -2.358029    |
| C        | -5.216084 |   | 2.656525                | -1.850562    |
| C        | -4.797327 |   | 3.725132                | -1.086857    |
| C        | -3.432468 |   | 3.823633                | -0.724580    |
| C        | -2.515041 |   | 2.841385                | -1.063295    |
| C        | -0.472555 |   | 0.989924                | -2.294289    |
| N        | 0.123993  |   | 0.473319                | -1.052670    |
| C        | 1.178276  |   | 0.948044                | -0.420297    |
| C        | 1.840624  |   | 0.487146                | 0.766561     |
| C        | 2.818543  |   | 1.576096                | 0.708809     |
| C        | 2.125502  |   | 2.098306                | -0.537658    |
| N        | 1.573620  |   | -0.596547               | 1.521144     |
| O        | 3.827911  |   | 1.903374                | 1.379064     |
| O        | 2.284462  |   | 3.043565                | -1.316835    |
| C        | 1.959129  |   | -0.864639               | 2.863607     |
| C        | 0.943925  |   | -1.257275               | 3.775745     |
| C        | 1.287895  |   | -1.563172               | 5.105589     |

|          |           |                        |           |
|----------|-----------|------------------------|-----------|
| C        | 2.621864  | -1.462475              | 5.531608  |
| C        | 3.616867  | -1.062131              | 4.634536  |
| C        | 3.298231  | -0.769812              | 3.299413  |
| H        | -0.255899 | 2.058011               | -2.352849 |
| H        | -0.349413 | -0.335896              | -0.632042 |
| H        | 0.843058  | -1.212076              | 1.138303  |
| Br       | -1.089884 | -2.322581              | 0.321967  |
| O        | -1.249109 | 2.934985               | -0.544884 |
| H        | -1.253365 | 3.698824               | 0.068940  |
| O        | -3.053369 | 4.844229               | 0.153866  |
| H        | -2.741938 | 5.617986               | -0.356176 |
| O        | -5.723023 | 4.657100               | -0.686191 |
| H        | -5.282774 | 5.273787               | -0.067109 |
| O        | -6.568844 | 2.513349               | -2.151313 |
| H        | -7.039854 | 3.343447               | -1.944748 |
| O        | -5.947500 | 0.590803               | -3.729448 |
| H        | -6.503505 | 1.309047               | -3.339687 |
| O        | -5.557770 | -1.715793              | -4.797899 |
| H        | -6.074280 | -0.915754              | -4.543740 |
| O        | -3.829839 | -3.650022              | -5.436979 |
| H        | -4.765801 | -3.482412              | -5.668668 |
| O        | -1.296668 | -3.674880              | -4.418385 |
| H        | -0.450814 | -3.484181              | -3.952337 |
| O        | -0.351816 | -1.776428              | -2.830317 |
| H        | -0.424921 | -2.063325              | -1.882133 |
| O        | 4.361659  | -0.444850              | 2.482320  |
| H        | 4.236548  | 0.488196               | 2.115882  |
| O        | 4.912957  | -0.973855              | 5.093400  |
| H        | 5.449204  | -0.671853              | 4.328994  |
| O        | 2.885270  | -1.764232              | 6.852216  |
| H        | 3.844456  | -1.674096              | 7.009443  |
| O        | 0.297194  | -1.940004              | 5.986266  |
| H        | 0.718341  | -2.101149              | 6.853000  |
| O        | -0.399970 | -1.285345              | 3.471104  |
| H        | -0.568711 | -1.519867              | 2.527692  |
| H        | 0.013921  | 0.497473               | -3.143378 |
| Compound |           | $7^{-}\text{NO}_3^{-}$ |           |
| Atom     | X         | Y                      | Z         |
| C        | -2.868345 | -2.522535              | -5.163764 |
| C        | -3.860414 | -1.591057              | -4.891554 |
| C        | -3.644104 | -0.534947              | -3.942269 |
| C        | -2.343344 | -0.410710              | -3.288156 |
| C        | -1.381908 | -1.440337              | -3.558416 |
| C        | -1.636340 | -2.460022              | -4.471142 |
| C        | -4.646925 | 0.413595               | -3.630854 |
| C        | -4.482642 | 1.400179               | -2.628883 |
| C        | -3.169268 | 1.534127               | -2.003942 |
| C        | -2.098903 | 0.697171               | -2.420949 |
| C        | -5.550452 | 2.269119               | -2.228760 |
| C        | -5.365748 | 3.226454               | -1.254001 |
| C        | -4.101538 | 3.351353               | -0.627712 |
| C        | -3.047082 | 2.516332               | -0.953161 |
| C        | -0.673048 | 1.067256               | -2.069103 |
| N        | -0.190708 | 0.313104               | -0.875420 |
| C        | 1.053578  | 0.479425               | -0.395866 |
| C        | 1.683863  | 0.101501               | 0.832400  |
| C        | 3.004467  | 0.541763               | 0.323416  |
| C        | 2.323782  | 0.998797               | -0.958610 |
| N        | 1.179075  | -0.435738              | 1.952027  |
| O        | 4.178574  | 0.470831               | 0.733638  |
| O        | 2.678270  | 1.539279               | -2.011087 |
| C        | 1.865208  | -0.757853              | 3.157387  |

|   |           |           |           |
|---|-----------|-----------|-----------|
| C | 1.245533  | -0.425279 | 4.389440  |
| C | 1.847972  | -0.826168 | 5.599640  |
| C | 3.063595  | -1.523458 | 5.590597  |
| C | 3.689821  | -1.824223 | 4.375610  |
| C | 3.097913  | -1.451078 | 3.162712  |
| H | -0.002665 | 0.829385  | -2.900687 |
| H | -0.588340 | 2.138000  | -1.873915 |
| H | -0.910126 | 0.072867  | -0.182686 |
| H | 0.153372  | -0.575487 | 1.939422  |
| N | -2.255717 | 0.497542  | 2.008490  |
| O | -1.560613 | 1.356154  | 2.641936  |
| O | -3.481162 | 0.655807  | 1.847367  |
| O | -1.667742 | -0.539606 | 1.523779  |
| O | 3.761729  | -1.850589 | 2.016009  |
| H | 4.086970  | -1.029671 | 1.547889  |
| O | 0.063459  | 0.251556  | 4.507010  |
| H | -0.290398 | 0.608507  | 3.650749  |
| O | 1.227264  | -0.505546 | 6.787603  |
| H | 1.787078  | -0.841385 | 7.514225  |
| O | 3.602512  | -1.867991 | 6.812466  |
| H | 4.441653  | -2.343596 | 6.662456  |
| O | 4.892877  | -2.495778 | 4.412247  |
| H | 5.166705  | -2.614253 | 3.477806  |
| O | -1.896369 | 2.591938  | -0.207236 |
| H | -2.104824 | 3.106898  | 0.599398  |
| O | -4.000607 | 4.216730  | 0.464698  |
| H | -3.587527 | 5.056879  | 0.183873  |
| O | -6.427678 | 4.023412  | -0.900854 |
| H | -6.159599 | 4.548663  | -0.119670 |
| O | -6.802562 | 2.118868  | -2.813758 |
| H | -7.430724 | 2.750490  | -2.413603 |
| O | -5.812236 | 0.327053  | -4.362577 |
| H | -6.490727 | 0.944718  | -3.999816 |
| O | -5.037763 | -1.806596 | -5.577825 |
| H | -5.666639 | -1.089300 | -5.332771 |
| O | -3.070944 | -3.545826 | -6.056445 |
| H | -3.979906 | -3.442725 | -6.404311 |
| O | -0.718118 | -3.451696 | -4.688441 |
| H | 0.027042  | -3.269914 | -4.076770 |
| O | -0.137488 | -1.562275 | -2.954074 |
| H | -0.153023 | -1.192062 | -2.039207 |

| Compound | 1         |           |           |
|----------|-----------|-----------|-----------|
| Atom     | X         | Y         | Z         |
| C        | -3.872315 | -2.776830 | -4.108103 |
| C        | -4.584548 | -1.688172 | -3.651451 |
| C        | -3.915862 | -0.529097 | -3.137514 |
| C        | -2.461559 | -0.492229 | -3.109915 |
| C        | -1.765512 | -1.653984 | -3.590416 |
| C        | -2.445776 | -2.755898 | -4.071058 |
| C        | -4.643750 | 0.568562  | -2.651630 |
| C        | -4.004187 | 1.703276  | -2.126479 |
| C        | -2.551072 | 1.756431  | -2.093851 |
| C        | -1.801319 | 0.661627  | -2.605063 |
| C        | -4.763535 | 2.806946  | -1.616821 |
| C        | -4.138090 | 3.915109  | -1.085607 |
| C        | -2.712812 | 3.970831  | -1.042418 |
| C        | -1.945885 | 2.930521  | -1.530564 |
| C        | -0.286469 | 0.692981  | -2.556423 |
| N        | 0.209186  | 0.124751  | -1.281957 |
| C        | 0.954458  | 0.796045  | -0.405168 |
| C        | 1.470360  | 0.500827  | 0.895670  |
| C        | 2.143768  | 1.832549  | 0.979429  |

| Journal Name |           |           |           | ARTICLE |
|--------------|-----------|-----------|-----------|---------|
| C            | 1.590520  | 2.137318  | -0.406991 |         |
| N            | 1.314621  | -0.615520 | 1.640554  |         |
| O            | 2.844623  | 2.450117  | 1.786901  |         |
| O            | 1.641249  | 3.090280  | -1.192187 |         |
| C            | 1.811255  | -0.938902 | 2.925852  |         |
| C            | 1.475306  | -2.206700 | 3.444502  |         |
| C            | 1.933856  | -2.588453 | 4.710488  |         |
| C            | 2.729142  | -1.715988 | 5.470801  |         |
| C            | 3.058812  | -0.456153 | 4.946093  |         |
| C            | 2.607809  | -0.057939 | 3.680156  |         |
| H            | -4.391553 | -3.654851 | -4.494168 |         |
| H            | -5.676062 | -1.690052 | -3.667670 |         |
| H            | -0.677421 | -1.683646 | -3.576171 |         |
| H            | -1.885619 | -3.622009 | -4.426165 |         |
| H            | -5.735245 | 0.535411  | -2.674474 |         |
| H            | -5.852823 | 2.747234  | -1.656276 |         |
| H            | -4.725524 | 4.748298  | -0.697742 |         |
| H            | -2.221471 | 4.847820  | -0.618312 |         |
| H            | -0.863351 | 3.016774  | -1.477551 |         |
| H            | 0.152333  | 0.124876  | -3.384533 |         |
| H            | 0.109487  | 1.707593  | -2.632396 |         |
| H            | -0.141193 | -0.799670 | -1.041126 |         |
| H            | 0.749473  | -1.352550 | 1.224430  |         |
| H            | 0.857394  | -2.889817 | 2.858598  |         |
| H            | 1.666688  | -3.571569 | 5.100188  |         |
| H            | 3.675960  | 0.232233  | 5.525595  |         |
| H            | 2.869868  | 0.921538  | 3.283962  |         |
| H            | 3.086111  | -2.013909 | 6.457098  |         |
| Compound     | <b>2</b>  |           |           |         |
| Atom         | X         | Y         | Z         |         |
| C            | -3.727452 | -2.700503 | -4.425414 |         |
| C            | -4.495717 | -1.587089 | -4.176507 |         |
| C            | -3.968861 | -0.461491 | -3.463943 |         |
| C            | -2.577719 | -0.472582 | -3.018512 |         |
| C            | -1.852569 | -1.687309 | -3.265070 |         |
| C            | -2.394957 | -2.753693 | -3.947116 |         |
| C            | -4.735882 | 0.679891  | -3.182291 |         |
| C            | -4.261543 | 1.772188  | -2.436937 |         |
| C            | -2.864173 | 1.752194  | -2.010204 |         |
| C            | -2.017697 | 0.668918  | -2.379591 |         |
| C            | -5.089861 | 2.892976  | -2.107582 |         |
| C            | -4.604113 | 3.951180  | -1.375010 |         |
| C            | -3.263363 | 3.930809  | -0.920802 |         |
| C            | -2.434394 | 2.871705  | -1.221999 |         |
| C            | -0.508609 | 0.772120  | -2.204419 |         |
| N            | -0.055540 | 0.271473  | -0.893292 |         |
| C            | 1.009358  | 0.757919  | -0.253971 |         |
| C            | 1.676043  | 0.412048  | 0.960368  |         |
| C            | 2.672334  | 1.512033  | 0.778688  |         |
| C            | 1.948447  | 1.877618  | -0.514720 |         |
| N            | 1.390376  | -0.577432 | 1.835075  |         |
| O            | 3.656346  | 1.955953  | 1.376498  |         |
| O            | 2.088846  | 2.729238  | -1.396919 |         |
| C            | 2.028261  | -0.950634 | 3.041840  |         |
| C            | 1.504867  | -2.067611 | 3.725543  |         |
| C            | 2.086215  | -2.487218 | 4.927431  |         |
| C            | 3.191166  | -1.802784 | 5.458999  |         |
| C            | 3.706104  | -0.692777 | 4.770548  |         |
| C            | 3.135030  | -0.258313 | 3.566456  |         |
| H            | -0.182646 | 1.808474  | -2.291508 |         |
| H            | -0.490797 | -0.584653 | -0.560871 |         |
| H            | 0.584404  | -1.154641 | 1.604591  |         |

| ARTICLE  |           |           |           | Journal Name |
|----------|-----------|-----------|-----------|--------------|
| H        | 0.647383  |           | -2.605156 | 3.315884     |
| H        | 1.671962  |           | -3.352346 | 5.446734     |
| H        | 4.564341  |           | -0.151447 | 5.171725     |
| H        | 3.543705  |           | 0.602938  | 3.040909     |
| H        | 3.643655  |           | -2.130191 | 6.395494     |
| F        | -1.195076 |           | 2.924195  | -0.680205    |
| F        | -2.822968 |           | 4.949389  | -0.159891    |
| F        | -5.387016 |           | 4.999063  | -1.060194    |
| F        | -6.384044 |           | 2.947016  | -2.490141    |
| F        | -6.003130 |           | 0.727223  | -3.647188    |
| F        | -5.771241 |           | -1.602810 | -4.619428    |
| F        | -4.226842 |           | -3.758123 | -5.090351    |
| F        | -1.685560 |           | -3.881603 | -4.133165    |
| F        | -0.604366 |           | -1.878698 | -2.766505    |
| H        | -0.005571 |           | 0.220638  | -3.004708    |
| Compound |           |           | <b>3</b>  |              |
| Atom     | X         | Y         | Z         |              |
| C        | -3.671550 | -2.671540 | -4.560672 |              |
| C        | -4.451694 | -1.655578 | -4.050612 |              |
| C        | -3.860257 | -0.526589 | -3.394677 |              |
| C        | -2.412464 | -0.441576 | -3.277219 |              |
| C        | -1.644050 | -1.528602 | -3.818525 |              |
| C        | -2.251363 | -2.604192 | -4.436867 |              |
| C        | -4.657972 | 0.495180  | -2.855735 |              |
| C        | -4.095338 | 1.598108  | -2.192917 |              |
| C        | -2.649720 | 1.699139  | -2.069606 |              |
| C        | -1.828991 | 0.683164  | -2.631819 |              |
| C        | -4.926021 | 2.622325  | -1.631338 |              |
| C        | -4.376594 | 3.698024  | -0.966196 |              |
| C        | -2.959344 | 3.799984  | -0.834188 |              |
| C        | -2.125095 | 2.836997  | -1.368232 |              |
| C        | -0.321805 | 0.764498  | -2.491320 |              |
| N        | 0.126674  | 0.098429  | -1.247309 |              |
| C        | 0.803981  | 0.706871  | -0.276400 |              |
| C        | 1.255595  | 0.331993  | 1.018208  |              |
| C        | 1.868631  | 1.654860  | 1.273912  |              |
| C        | 1.401577  | 2.072347  | -0.124848 |              |
| N        | 1.133630  | -0.799520 | 1.753311  |              |
| O        | 2.467604  | 2.186573  | 2.211559  |              |
| O        | 1.451126  | 3.086930  | -0.820852 |              |
| C        | 1.780584  | -0.989928 | 2.992051  |              |
| C        | 1.043372  | -1.326397 | 4.140920  |              |
| C        | 1.665246  | -1.536903 | 5.374529  |              |
| C        | 3.053377  | -1.390037 | 5.483320  |              |
| C        | 3.809455  | -1.055617 | 4.353420  |              |
| C        | 3.176619  | -0.876429 | 3.120019  |              |
| H        | 0.034410  | 1.795680  | -2.451717 |              |
| H        | -0.187578 | -0.859744 | -1.112279 |              |
| H        | 0.465020  | -1.511324 | 1.468967  |              |
| F        | -0.299530 | -1.443054 | 4.054710  |              |
| F        | 0.934774  | -1.854976 | 6.461497  |              |
| F        | 5.148449  | -0.938124 | 4.453224  |              |
| F        | 3.932537  | -0.617762 | 2.034122  |              |
| F        | 3.660653  | -1.578242 | 6.669651  |              |
| H        | -1.051589 | 2.956238  | -1.244235 |              |
| H        | -2.528228 | 4.650902  | -0.304639 |              |
| H        | -5.017966 | 4.470461  | -0.539965 |              |
| H        | -6.008109 | 2.527931  | -1.740277 |              |
| H        | -5.744225 | 0.426183  | -2.946375 |              |
| H        | -5.539570 | -1.694057 | -4.132379 |              |
| H        | -4.132404 | -3.527422 | -5.055273 |              |
| H        | -1.637641 | -3.413303 | -4.835253 |              |

|          |  |           |  |           |  |           |
|----------|--|-----------|--|-----------|--|-----------|
| H        |  | -0.558081 |  | -1.521412 |  | -3.743241 |
| H        |  | 0.185971  |  | 0.292856  |  | -3.340252 |
| Compound |  |           |  | <b>4</b>  |  |           |
| Atom     |  | X         |  | Y         |  | Z         |
| C        |  | -4.682505 |  | 3.551152  |  | -0.110009 |
| C        |  | -5.188394 |  | 2.309464  |  | -0.416850 |
| C        |  | -4.437602 |  | 1.115413  |  | -0.165935 |
| C        |  | -3.120999 |  | 1.205775  |  | 0.460279  |
| C        |  | -2.634146 |  | 2.534851  |  | 0.701925  |
| C        |  | -3.381814 |  | 3.661451  |  | 0.440718  |
| C        |  | -4.923090 |  | -0.162565 |  | -0.484288 |
| C        |  | -4.186114 |  | -1.344118 |  | -0.298437 |
| C        |  | -2.877446 |  | -1.238910 |  | 0.343233  |
| C        |  | -2.398207 |  | 0.025092  |  | 0.789468  |
| C        |  | -4.682382 |  | -2.627174 |  | -0.696255 |
| C        |  | -3.943765 |  | -3.771545 |  | -0.503281 |
| C        |  | -2.658622 |  | -3.683951 |  | 0.084027  |
| C        |  | -2.148441 |  | -2.467093 |  | 0.482240  |
| C        |  | -1.187335 |  | 0.113422  |  | 1.708760  |
| N        |  | 0.078616  |  | 0.244543  |  | 0.963597  |
| C        |  | 1.235318  |  | -0.261702 |  | 1.389478  |
| C        |  | 2.563272  |  | -0.258808 |  | 0.889991  |
| C        |  | 3.072086  |  | -1.078026 |  | 2.014326  |
| C        |  | 1.641125  |  | -1.085156 |  | 2.572838  |
| N        |  | 3.131086  |  | 0.265939  |  | -0.223261 |
| O        |  | 4.160681  |  | -1.555612 |  | 2.338914  |
| O        |  | 1.062141  |  | -1.568616 |  | 3.543997  |
| C        |  | 4.520671  |  | 0.255887  |  | -0.460587 |
| C        |  | 5.042158  |  | -0.293814 |  | -1.644845 |
| C        |  | 6.414583  |  | -0.299240 |  | -1.907612 |
| C        |  | 7.301775  |  | 0.233142  |  | -0.964274 |
| C        |  | 6.806852  |  | 0.786251  |  | 0.222865  |
| C        |  | 5.429264  |  | 0.811437  |  | 0.458260  |
| F        |  | 4.198196  |  | -0.836872 |  | -2.549153 |
| F        |  | 6.888465  |  | -0.835933 |  | -3.049383 |
| F        |  | 7.658746  |  | 1.320597  |  | 1.120340  |
| F        |  | 4.972731  |  | 1.406392  |  | 1.578724  |
| F        |  | 8.626600  |  | 0.220340  |  | -1.201675 |
| F        |  | -0.885164 |  | -2.492118 |  | 0.968422  |
| F        |  | -1.929960 |  | -4.807387 |  | 0.215365  |
| F        |  | -4.409798 |  | -4.974753 |  | -0.884228 |
| F        |  | -5.888137 |  | -2.761522 |  | -1.289690 |
| F        |  | -6.165667 |  | -0.261333 |  | -1.004355 |
| F        |  | -6.416513 |  | 2.261665  |  | -0.976077 |
| F        |  | -5.388235 |  | 4.670906  |  | -0.351015 |
| F        |  | -2.874999 |  | 4.887901  |  | 0.661675  |
| F        |  | -1.367158 |  | 2.755057  |  | 1.137480  |
| H        |  | -1.112732 |  | -0.777733 |  | 2.331458  |
| H        |  | -1.303229 |  | 0.960328  |  | 2.391881  |
| H        |  | 0.079987  |  | 0.883281  |  | 0.172778  |
| H        |  | 2.533798  |  | 0.575181  |  | -0.986793 |
| Compound |  |           |  | <b>5</b>  |  |           |
| Atom     |  | X         |  | Y         |  | Z         |
| C        |  | -3.429501 |  | -2.397311 |  | -4.804221 |
| C        |  | -4.271286 |  | -1.320206 |  | -4.561872 |
| C        |  | -3.883017 |  | -0.263182 |  | -3.670597 |
| C        |  | -2.564229 |  | -0.302318 |  | -3.043434 |
| C        |  | -1.770562 |  | -1.471976 |  | -3.273119 |
| C        |  | -2.186756 |  | -2.484373 |  | -4.132988 |
| C        |  | -4.725223 |  | 0.841115  |  | -3.398258 |
| C        |  | -4.395483 |  | 1.835887  |  | -2.445914 |
| C        |  | -3.067539 |  | 1.793594  |  | -1.840596 |

| ARTICLE  |           |           |           | Journal Name |
|----------|-----------|-----------|-----------|--------------|
| C        | -2.135810 | 0.796608  | -2.237980 |              |
| C        | -5.304635 | 2.883976  | -2.084929 |              |
| C        | -4.953922 | 3.851567  | -1.166220 |              |
| C        | -3.679237 | 3.799465  | -0.549741 |              |
| C        | -2.781947 | 2.784567  | -0.834119 |              |
| C        | -0.656023 | 1.009872  | -1.987943 |              |
| N        | -0.167564 | 0.283937  | -0.774675 |              |
| C        | 1.157806  | 0.223928  | -0.505803 |              |
| C        | 1.908206  | -0.102452 | 0.658596  |              |
| C        | 3.203466  | 0.041581  | -0.091443 |              |
| C        | 2.372731  | 0.365299  | -1.338175 |              |
| N        | 1.474986  | -0.404643 | 1.898696  |              |
| O        | 4.405248  | -0.049646 | 0.151279  |              |
| O        | 2.620910  | 0.623634  | -2.517710 |              |
| C        | 2.197648  | -0.719151 | 3.076065  |              |
| C        | 1.444316  | -0.999183 | 4.234431  |              |
| C        | 2.095740  | -1.317257 | 5.431669  |              |
| C        | 3.498013  | -1.359877 | 5.487294  |              |
| C        | 4.239447  | -1.079337 | 4.328623  |              |
| C        | 3.602907  | -0.758457 | 3.121820  |              |
| H        | -0.436468 | 2.075321  | -1.877109 |              |
| H        | -0.793751 | 0.395240  | 0.023173  |              |
| H        | 0.464638  | -0.412840 | 2.024841  |              |
| H        | 0.353874  | -0.968048 | 4.197626  |              |
| H        | 1.502054  | -1.532035 | 6.321030  |              |
| H        | 5.329693  | -1.108667 | 4.357260  |              |
| H        | 4.189198  | -0.543686 | 2.230618  |              |
| H        | 4.004965  | -1.608175 | 6.420147  |              |
| O        | -1.633014 | 2.692495  | -0.082191 |              |
| H        | -1.697937 | 3.376315  | 0.616874  |              |
| O        | -3.411424 | 4.684886  | 0.498139  |              |
| H        | -2.950700 | 5.474850  | 0.152564  |              |
| O        | -5.871336 | 4.825710  | -0.854888 |              |
| H        | -5.533548 | 5.326070  | -0.085027 |              |
| O        | -6.573079 | 2.902878  | -2.650981 |              |
| H        | -7.089201 | 3.644171  | -2.279466 |              |
| O        | -5.898703 | 0.901841  | -4.117399 |              |
| H        | -6.467259 | 1.635696  | -3.783463 |              |
| O        | -5.484379 | -1.395922 | -5.214203 |              |
| H        | -5.991252 | -0.577209 | -5.008724 |              |
| O        | -3.797770 | -3.420293 | -5.641976 |              |
| H        | -4.687365 | -3.200343 | -5.985590 |              |
| O        | -1.428460 | -3.609444 | -4.312619 |              |
| H        | -0.649597 | -3.511583 | -3.724710 |              |
| O        | -0.554687 | -1.744667 | -2.663123 |              |
| H        | -0.502405 | -1.307157 | -1.780079 |              |
| H        | -0.072007 | 0.637599  | -2.834319 |              |
| Compound |           | <b>6</b>  |           |              |
| Atom     | X         | Y         | Z         |              |
| C        | -3.525403 | -2.753686 | -4.502273 |              |
| C        | -4.346489 | -1.785034 | -3.965299 |              |
| C        | -3.800819 | -0.626388 | -3.321650 |              |
| C        | -2.357325 | -0.459289 | -3.246644 |              |
| C        | -1.544878 | -1.500023 | -3.813598 |              |
| C        | -2.108306 | -2.606632 | -4.418536 |              |
| C        | -4.639064 | 0.345719  | -2.753376 |              |
| C        | -4.121134 | 1.476751  | -2.101583 |              |
| C        | -2.680847 | 1.661170  | -2.022462 |              |
| C        | -1.820875 | 0.695983  | -2.614799 |              |
| C        | -4.992052 | 2.448166  | -1.508262 |              |
| C        | -4.485448 | 3.551078  | -0.853755 |              |
| C        | -3.073115 | 3.735174  | -0.765872 |              |



|          |           |           |           |
|----------|-----------|-----------|-----------|
| C        | -2.201257 | 2.824826  | -1.331455 |
| C        | -0.318083 | 0.865231  | -2.517709 |
| N        | 0.195430  | 0.242457  | -1.275106 |
| C        | 0.872557  | 0.894706  | -0.337855 |
| C        | 1.401870  | 0.538312  | 0.943415  |
| C        | 2.015959  | 1.864403  | 1.115520  |
| C        | 1.407400  | 2.284360  | -0.209710 |
| N        | 1.333379  | -0.600457 | 1.661331  |
| O        | 2.780680  | 2.384086  | 1.953717  |
| O        | 1.371920  | 3.307766  | -0.896631 |
| C        | 1.762819  | -0.819343 | 3.006296  |
| C        | 0.840290  | -1.448398 | 3.875439  |
| C        | 1.235296  | -1.827684 | 5.168958  |
| C        | 2.536317  | -1.534693 | 5.609118  |
| C        | 3.430744  | -0.856510 | 4.771325  |
| C        | 3.055979  | -0.497027 | 3.468459  |
| H        | -3.951271 | -3.632890 | -4.987183 |
| H        | -5.432364 | -1.884668 | -4.015414 |
| H        | -0.459416 | -1.432360 | -3.767903 |
| H        | -1.461693 | -3.379099 | -4.837060 |
| H        | -5.721758 | 0.214208  | -2.811140 |
| H        | -6.069651 | 2.291055  | -1.584138 |
| H        | -5.156868 | 4.282819  | -0.402783 |
| H        | -2.675823 | 4.607808  | -0.245303 |
| H        | -1.133188 | 3.007172  | -1.241136 |
| H        | 0.195979  | 0.409607  | -3.371180 |
| H        | -0.019437 | 1.915346  | -2.498917 |
| H        | -0.071745 | -0.726739 | -1.114893 |
| H        | 0.944968  | -1.416149 | 1.190515  |
| O        | -0.447542 | -1.751864 | 3.487413  |
| H        | -0.699307 | -1.164267 | 2.748948  |
| O        | 0.330461  | -2.459042 | 5.990413  |
| H        | 0.764906  | -2.611310 | 6.852282  |
| O        | 2.860783  | -1.908748 | 6.893745  |
| H        | 3.775140  | -1.624060 | 7.084144  |
| O        | 4.678936  | -0.556163 | 5.267692  |
| H        | 5.151877  | -0.075539 | 4.555564  |
| O        | 4.019000  | 0.125446  | 2.701281  |
| H        | 3.681128  | 1.040380  | 2.467884  |
| Compound |           | <b>7</b>  |           |
| Atom     | X         | Y         | Z         |
| C        | -2.906219 | -2.196999 | -5.196016 |
| C        | -3.887728 | -1.249688 | -4.938403 |
| C        | -3.707506 | -0.254348 | -3.918366 |
| C        | -2.452483 | -0.211972 | -3.172604 |
| C        | -1.509503 | -1.257291 | -3.431740 |
| C        | -1.724804 | -2.216231 | -4.416608 |
| C        | -4.696627 | 0.714695  | -3.627223 |
| C        | -4.569929 | 1.637648  | -2.560417 |
| C        | -3.303326 | 1.680609  | -1.836224 |
| C        | -2.228447 | 0.837436  | -2.230346 |
| C        | -5.624600 | 2.537271  | -2.195486 |
| C        | -5.471640 | 3.439157  | -1.162575 |
| C        | -4.257681 | 3.464950  | -0.432615 |
| C        | -3.224343 | 2.590378  | -0.722074 |
| C        | -0.810584 | 1.190126  | -1.824088 |
| N        | -0.347160 | 0.445189  | -0.615095 |
| C        | 0.949504  | 0.427459  | -0.263399 |
| C        | 1.648453  | 0.028504  | 0.913091  |
| C        | 2.959460  | 0.230340  | 0.260769  |
| C        | 2.222384  | 0.700794  | -0.990114 |
| N        | 1.222482  | -0.378239 | 2.123613  |

|          |           |                                               |           |
|----------|-----------|-----------------------------------------------|-----------|
| O        | 4.142448  | 0.014522                                      | 0.574453  |
| O        | 2.535886  | 1.101269                                      | -2.110379 |
| C        | 2.006217  | -0.613130                                     | 3.295718  |
| C        | 1.564328  | -0.000491                                     | 4.491621  |
| C        | 2.197081  | -0.296437                                     | 5.710447  |
| C        | 3.298692  | -1.167387                                     | 5.725153  |
| C        | 3.774676  | -1.727446                                     | 4.532462  |
| C        | 3.134042  | -1.459573                                     | 3.314207  |
| H        | -0.728207 | 2.262791                                      | -1.625829 |
| H        | -1.038362 | 0.422767                                      | 0.134832  |
| H        | 0.226466  | -0.572955                                     | 2.217587  |
| O        | -2.138201 | 2.551811                                      | 0.122336  |
| H        | -2.340206 | 3.149932                                      | 0.871839  |
| O        | -4.188110 | 4.261789                                      | 0.713118  |
| H        | -3.806330 | 5.132840                                      | 0.487004  |
| O        | -6.521309 | 4.270923                                      | -0.856745 |
| H        | -6.315381 | 4.725305                                      | -0.015184 |
| O        | -6.832119 | 2.475881                                      | -2.878991 |
| H        | -7.462099 | 3.115242                                      | -2.493863 |
| O        | -5.804625 | 0.716286                                      | -4.445037 |
| H        | -6.482399 | 1.346448                                      | -4.102935 |
| O        | -5.020929 | -1.389368                                     | -5.711387 |
| H        | -5.639578 | -0.659268                                     | -5.479427 |
| O        | -3.076209 | -3.162970                                     | -6.155809 |
| H        | -3.953394 | -3.009594                                     | -6.561873 |
| O        | -0.827542 | -3.227734                                     | -4.623403 |
| H        | -0.121513 | -3.109871                                     | -3.952912 |
| O        | -0.325211 | -1.450474                                     | -2.730828 |
| H        | -0.432728 | -1.164667                                     | -1.796561 |
| O        | 3.642447  | -2.092502                                     | 2.197265  |
| H        | 3.977009  | -1.386745                                     | 1.574593  |
| O        | 4.882828  | -2.540611                                     | 4.599100  |
| H        | 5.073255  | -2.827686                                     | 3.681056  |
| O        | 3.892797  | -1.402323                                     | 6.944286  |
| H        | 4.653383  | -2.000938                                     | 6.815624  |
| O        | 1.738077  | 0.291912                                      | 6.865519  |
| H        | 2.311226  | -0.002908                                     | 7.599883  |
| O        | 0.490744  | 0.863303                                      | 4.523975  |
| H        | 0.356632  | 1.229399                                      | 3.628369  |
| H        | -0.113909 | 0.947138                                      | -2.630385 |
| Compound |           | NO <sub>3</sub> <sup>-</sup>                  |           |
| Atom     | X         | Y                                             | Z         |
| N        | -2.251342 | -1.178709                                     | 0.657890  |
| O        | -2.290359 | -0.033740                                     | 1.206973  |
| O        | -3.325755 | -1.731703                                     | 0.265300  |
| O        | -1.137923 | -1.770462                                     | 0.501226  |
| Compound |           | 5 <sub>OH</sub> <sup>-</sup> -Cl <sup>-</sup> |           |
| Atom     | X         | Y                                             | Z         |
| C        | -4.001083 | -2.843246                                     | -3.399717 |
| C        | -4.676559 | -1.655216                                     | -3.228476 |
| C        | -3.964277 | -0.442466                                     | -2.958326 |
| C        | -2.506219 | -0.429615                                     | -2.877569 |
| C        | -1.854557 | -1.707898                                     | -3.090968 |
| C        | -2.582361 | -2.862677                                     | -3.331598 |
| C        | -4.679747 | 0.746778                                      | -2.748455 |
| C        | -4.041142 | 1.946833                                      | -2.412538 |
| C        | -2.592145 | 1.972725                                      | -2.291573 |
| C        | -1.837305 | 0.792232                                      | -2.561558 |
| C        | -4.802203 | 3.138466                                      | -2.173603 |
| C        | -4.184801 | 4.313796                                      | -1.804837 |
| C        | -2.766407 | 4.343736                                      | -1.652267 |
| C        | -1.998919 | 3.219588                                      | -1.888422 |

| Journal Name |           |                              |           | ARTICLE |
|--------------|-----------|------------------------------|-----------|---------|
| C            | -0.314725 | 0.870097                     | -2.499136 |         |
| N            | 0.229987  | 0.267502                     | -1.267733 |         |
| C            | 0.846548  | 0.935116                     | -0.299062 |         |
| C            | 1.411699  | 0.525273                     | 0.954123  |         |
| C            | 1.837197  | 1.920892                     | 1.266466  |         |
| C            | 1.255983  | 2.344171                     | -0.073016 |         |
| N            | 1.466641  | -0.714953                    | 1.482580  |         |
| O            | 2.419851  | 2.515516                     | 2.183750  |         |
| O            | 1.181965  | 3.405040                     | -0.708380 |         |
| C            | 1.994318  | -1.148823                    | 2.718352  |         |
| C            | 1.948423  | -2.534415                    | 2.986177  |         |
| C            | 2.448567  | -3.030114                    | 4.195750  |         |
| C            | 2.998312  | -2.159068                    | 5.150730  |         |
| C            | 3.039736  | -0.782299                    | 4.876832  |         |
| C            | 2.542537  | -0.268346                    | 3.671286  |         |
| H            | 0.031106  | 1.902981                     | -2.531801 |         |
| H            | 0.126104  | -0.747166                    | -1.181879 |         |
| H            | 1.092133  | -1.473459                    | 0.889415  |         |
| H            | 1.522443  | -3.211371                    | 2.244683  |         |
| H            | 2.407039  | -4.103068                    | 4.389692  |         |
| H            | 3.463581  | -0.092733                    | 5.608990  |         |
| H            | 2.584585  | 0.800715                     | 3.468818  |         |
| H            | 3.387422  | -2.547049                    | 6.092816  |         |
| Cl           | 0.401430  | -3.156541                    | -0.489412 |         |
| H            | -2.278402 | 5.268130                     | -1.338810 |         |
| H            | -4.771823 | 5.214679                     | -1.620762 |         |
| H            | -5.887222 | 3.087847                     | -2.284007 |         |
| H            | -5.768620 | 0.728170                     | -2.831301 |         |
| H            | -5.765680 | -1.615300                    | -3.279596 |         |
| H            | -4.542194 | -3.770333                    | -3.593716 |         |
| H            | -2.039534 | -3.797653                    | -3.476156 |         |
| O            | -0.478397 | -1.780018                    | -3.056382 |         |
| H            | -0.200928 | -2.499694                    | -2.424513 |         |
| H            | 0.129212  | 0.349016                     | -3.350862 |         |
| H            | -0.926144 | 3.297291                     | -1.732343 |         |
| Compound     |           | $5_{\text{OH}^-}\text{Br}^-$ |           |         |
| Atom         | X         | Y                            | Z         |         |
| C            | -3.809319 | -2.601976                    | -4.531628 |         |
| C            | -4.554420 | -1.497569                    | -4.179542 |         |
| C            | -3.975098 | -0.442075                    | -3.403554 |         |
| C            | -2.574718 | -0.510818                    | -2.994766 |         |
| C            | -1.894288 | -1.764454                    | -3.260671 |         |
| C            | -2.476905 | -2.738398                    | -4.051835 |         |
| C            | -4.748546 | 0.672423                     | -3.038805 |         |
| C            | -4.207575 | 1.742623                     | -2.310444 |         |
| C            | -2.790509 | 1.736434                     | -1.998533 |         |
| C            | -1.980004 | 0.638364                     | -2.401401 |         |
| C            | -5.017739 | 2.852332                     | -1.902577 |         |
| C            | -4.469363 | 3.917228                     | -1.218933 |         |
| C            | -3.075114 | 3.921321                     | -0.911964 |         |
| C            | -2.262350 | 2.872205                     | -1.296214 |         |
| C            | -0.473699 | 0.783332                     | -2.270381 |         |
| N            | -0.028155 | 0.479387                     | -0.900655 |         |
| C            | 1.095839  | 0.914950                     | -0.341652 |         |
| C            | 1.775591  | 0.515342                     | 0.851999  |         |
| C            | 2.816547  | 1.567679                     | 0.665854  |         |
| C            | 2.088419  | 1.983045                     | -0.612082 |         |
| N            | 1.448939  | -0.494412                    | 1.685534  |         |
| O            | 3.828460  | 1.962198                     | 1.259393  |         |
| O            | 2.256295  | 2.837509                     | -1.491324 |         |
| C            | 2.065369  | -0.926957                    | 2.877235  |         |
| C            | 1.522268  | -2.072070                    | 3.498715  |         |

|          |           |                                   |           |
|----------|-----------|-----------------------------------|-----------|
| C        | 2.082091  | -2.552144                         | 4.687802  |
| C        | 3.180773  | -1.900306                         | 5.272232  |
| C        | 3.713540  | -0.760421                         | 4.648022  |
| C        | 3.165316  | -0.265881                         | 3.456533  |
| H        | -0.169433 | 1.808796                          | -2.508121 |
| H        | -0.504491 | -0.314505                         | -0.448512 |
| H        | 0.641659  | -1.065975                         | 1.391922  |
| H        | 0.669404  | -2.578124                         | 3.043671  |
| H        | 1.655271  | -3.439072                         | 5.158586  |
| H        | 4.566927  | -0.244189                         | 5.091049  |
| H        | 3.588515  | 0.615269                          | 2.976122  |
| H        | 3.615110  | -2.275453                         | 6.199585  |
| Br       | -1.222885 | -2.286600                         | 0.444992  |
| H        | -1.209307 | 2.899064                          | -1.024500 |
| H        | -2.648024 | 4.761228                          | -0.362062 |
| H        | -5.094521 | 4.756107                          | -0.909987 |
| H        | -6.081445 | 2.834955                          | -2.147613 |
| H        | -5.798329 | 0.707359                          | -3.338055 |
| H        | -5.597648 | -1.403622                         | -4.485270 |
| H        | -4.245890 | -3.397866                         | -5.136520 |
| H        | -1.912914 | -3.651837                         | -4.242440 |
| O        | -0.623548 | -2.023961                         | -2.774313 |
| H        | -0.682267 | -2.087035                         | -1.782526 |
| H        | 0.036774  | 0.113597                          | -2.969383 |
| Compound |           | $\sigma_{\text{OH}^-\text{Cl}^-}$ |           |
| Atom     | X         | Y                                 | Z         |
| C        | -3.599140 | -2.787160                         | -4.307737 |
| C        | -4.385051 | -1.768690                         | -3.811845 |
| C        | -3.798117 | -0.599020                         | -3.226696 |
| C        | -2.349391 | -0.475437                         | -3.168103 |
| C        | -1.575168 | -1.567874                         | -3.688961 |
| C        | -2.177410 | -2.682597                         | -4.238371 |
| C        | -4.600935 | 0.424929                          | -2.699708 |
| C        | -4.041363 | 1.566975                          | -2.103731 |
| C        | -2.595207 | 1.706812                          | -2.041535 |
| C        | -1.770000 | 0.688699                          | -2.593223 |
| C        | -4.874895 | 2.593639                          | -1.550836 |
| C        | -4.327157 | 3.707779                          | -0.950443 |
| C        | -2.908825 | 3.848149                          | -0.878560 |
| C        | -2.072187 | 2.884020                          | -1.406990 |
| C        | -0.260454 | 0.811170                          | -2.506723 |
| N        | 0.235125  | 0.238253                          | -1.238743 |
| C        | 0.890492  | 0.936955                          | -0.313588 |
| C        | 1.337506  | 0.617003                          | 1.007574  |
| C        | 1.896546  | 1.985911                          | 1.200604  |
| C        | 1.449864  | 2.309383                          | -0.220909 |
| N        | 1.169978  | -0.525827                         | 1.697306  |
| O        | 2.455435  | 2.614215                          | 2.107954  |
| O        | 1.495213  | 3.298643                          | -0.966038 |
| C        | 1.685209  | -0.866731                         | 2.968877  |
| C        | 1.013390  | -1.850183                         | 3.745727  |
| C        | 1.515569  | -2.176227                         | 5.017551  |
| C        | 2.662306  | -1.552042                         | 5.522948  |
| C        | 3.336734  | -0.595420                         | 4.746952  |
| C        | 2.854323  | -0.267638                         | 3.474934  |
| H        | -4.056563 | -3.674457                         | -4.747331 |
| H        | -5.473998 | -1.836488                         | -3.849813 |
| H        | -0.488345 | -1.536705                         | -3.642741 |
| H        | -1.558803 | -3.496337                         | -4.619584 |
| H        | -5.687811 | 0.326209                          | -2.745038 |
| H        | -5.957805 | 2.469640                          | -1.612575 |
| H        | -4.970898 | 4.481205                          | -0.529367 |

|          |           |                                          |           |
|----------|-----------|------------------------------------------|-----------|
| H        | -2.478929 | 4.729231                                 | -0.399594 |
| H        | -0.997878 | 3.032071                                 | -1.329996 |
| H        | 0.229003  | 0.295402                                 | -3.340877 |
| H        | 0.070535  | 1.851331                                 | -2.550003 |
| H        | -0.101577 | -0.700214                                | -0.987011 |
| H        | 0.611910  | -1.245623                                | 1.208364  |
| Cl       | -0.731087 | -2.626696                                | 0.252410  |
| O        | -0.137421 | -2.490073                                | 3.361397  |
| H        | -0.316048 | -2.450467                                | 2.385283  |
| H        | 0.981072  | -2.926878                                | 5.600667  |
| H        | 3.031010  | -1.821510                                | 6.513500  |
| H        | 4.240318  | -0.113248                                | 5.121123  |
| H        | 3.371454  | 0.471398                                 | 2.867237  |
| Compound |           | $\delta_{\text{OH}^{\cdots}\text{Br}^-}$ |           |
| Atom     | X         | Y                                        | Z         |
| C        | -3.432923 | -2.845829                                | -4.164489 |
| C        | -4.130367 | -2.015500                                | -3.313379 |
| C        | -3.532393 | -0.824059                                | -2.787563 |
| C        | -2.174292 | -0.471750                                | -3.170645 |
| C        | -1.488962 | -1.372495                                | -4.054215 |
| C        | -2.094233 | -2.517192                                | -4.533293 |
| C        | -4.227740 | -0.012110                                | -1.879115 |
| C        | -3.641913 | 1.135262                                 | -1.319690 |
| C        | -2.292749 | 1.512034                                 | -1.708160 |
| C        | -1.578552 | 0.702294                                 | -2.634252 |
| C        | -4.353014 | 1.935369                                 | -0.366921 |
| C        | -3.774278 | 3.052935                                 | 0.197517  |
| C        | -2.451137 | 3.430472                                 | -0.179120 |
| C        | -1.737488 | 2.688086                                 | -1.100481 |
| C        | -0.106106 | 0.973036                                 | -2.882408 |
| N        | 0.658288  | 0.307037                                 | -1.796203 |
| C        | 1.230008  | 0.990557                                 | -0.796107 |
| C        | 1.520306  | 0.642228                                 | 0.557683  |
| C        | 2.106102  | 1.986266                                 | 0.830944  |
| C        | 1.799643  | 2.349155                                 | -0.624563 |
| N        | 1.206995  | -0.475099                                | 1.233146  |
| O        | 2.585950  | 2.575659                                 | 1.804793  |
| O        | 1.910905  | 3.358334                                 | -1.333797 |
| C        | 1.431573  | -0.732870                                | 2.608907  |
| C        | 0.414002  | -1.369913                                | 3.367467  |
| C        | 0.627332  | -1.591921                                | 4.739253  |
| C        | 1.821440  | -1.196188                                | 5.354309  |
| C        | 2.832098  | -0.578572                                | 4.599021  |
| C        | 2.635738  | -0.359652                                | 3.230710  |
| H        | -3.894833 | -3.754977                                | -4.551989 |
| H        | -5.151461 | -2.257427                                | -3.011867 |
| H        | -0.461697 | -1.170919                                | -4.350649 |
| H        | -1.539598 | -3.182725                                | -5.196528 |
| H        | -5.238109 | -0.295795                                | -1.575695 |
| H        | -5.366070 | 1.634298                                 | -0.092774 |
| H        | -4.322620 | 3.650873                                 | 0.926724  |
| H        | -1.996835 | 4.317645                                 | 0.264781  |
| H        | -0.736368 | 3.018739                                 | -1.364733 |
| H        | 0.229742  | 0.580970                                 | -3.846718 |
| H        | 0.141386  | 2.036938                                 | -2.871637 |
| H        | 0.271305  | -0.611213                                | -1.534724 |
| H        | 0.639473  | -1.163402                                | 0.710170  |
| Br       | -0.941162 | -2.397260                                | -0.380274 |
| O        | -0.810414 | -1.734661                                | 2.868182  |
| H        | -0.821730 | -1.849294                                | 1.881478  |
| H        | -0.166883 | -2.072636                                | 5.311269  |
| H        | 1.963118  | -1.377987                                | 6.420447  |

|          |  |           |  |                                                |  |           |
|----------|--|-----------|--|------------------------------------------------|--|-----------|
| H        |  | 3.770065  |  | -0.278272                                      |  | 5.066597  |
| H        |  | 3.409491  |  | 0.112626                                       |  | 2.627678  |
| Compound |  |           |  | $6_{\text{OH}^{\ominus}\text{NO}_3^{\ominus}}$ |  |           |
| Atom     |  | X         |  | Y                                              |  | Z         |
| C        |  | -3.492154 |  | -2.731485                                      |  | -4.670021 |
| C        |  | -4.298128 |  | -1.760260                                      |  | -4.115392 |
| C        |  | -3.735381 |  | -0.631735                                      |  | -3.434121 |
| C        |  | -2.289448 |  | -0.495032                                      |  | -3.343112 |
| C        |  | -1.493727 |  | -1.538631                                      |  | -3.927981 |
| C        |  | -2.073216 |  | -2.617279                                      |  | -4.566706 |
| C        |  | -4.560543 |  | 0.333568                                       |  | -2.836896 |
| C        |  | -4.026426 |  | 1.429307                                       |  | -2.139333 |
| C        |  | -2.583977 |  | 1.586931                                       |  | -2.051314 |
| C        |  | -1.735735 |  | 0.629167                                       |  | -2.672201 |
| C        |  | -4.882123 |  | 2.391138                                       |  | -1.509436 |
| C        |  | -4.358805 |  | 3.459932                                       |  | -0.812386 |
| C        |  | -2.943898 |  | 3.619774                                       |  | -0.719098 |
| C        |  | -2.086872 |  | 2.717515                                       |  | -1.319321 |
| C        |  | -0.230470 |  | 0.770173                                       |  | -2.550187 |
| N        |  | 0.242312  |  | 0.170993                                       |  | -1.284993 |
| C        |  | 0.855957  |  | 0.857338                                       |  | -0.321052 |
| C        |  | 1.227440  |  | 0.532710                                       |  | 1.020693  |
| C        |  | 1.808545  |  | 1.886107                                       |  | 1.240841  |
| C        |  | 1.435994  |  | 2.220344                                       |  | -0.201376 |
| N        |  | 1.007575  |  | -0.579140                                      |  | 1.741957  |
| O        |  | 2.336393  |  | 2.494215                                       |  | 2.179248  |
| O        |  | 1.528764  |  | 3.208780                                       |  | -0.942853 |
| C        |  | 1.565055  |  | -0.863297                                      |  | 3.014656  |
| C        |  | 0.782997  |  | -1.559289                                      |  | 3.971680  |
| C        |  | 1.349240  |  | -1.868624                                      |  | 5.221826  |
| C        |  | 2.658775  |  | -1.481878                                      |  | 5.530587  |
| C        |  | 3.430233  |  | -0.785233                                      |  | 4.585134  |
| C        |  | 2.883944  |  | -0.490914                                      |  | 3.330899  |
| H        |  | 0.286101  |  | 0.285222                                       |  | -3.385710 |
| H        |  | 0.085114  |  | 1.816486                                       |  | -2.557186 |
| H        |  | -0.113604 |  | -0.761804                                      |  | -1.051993 |
| H        |  | 0.427053  |  | -1.303860                                      |  | 1.284740  |
| N        |  | -1.931544 |  | -1.970792                                      |  | 0.525502  |
| O        |  | -2.136174 |  | -1.383418                                      |  | 1.637059  |
| O        |  | -2.881458 |  | -2.288908                                      |  | -0.216537 |
| O        |  | -0.720565 |  | -2.226914                                      |  | 0.173693  |
| H        |  | -0.408168 |  | -1.499275                                      |  | -3.862086 |
| H        |  | -1.438367 |  | -3.394659                                      |  | -4.994383 |
| H        |  | -3.931339 |  | -3.589163                                      |  | -5.181210 |
| H        |  | -5.385461 |  | -1.837077                                      |  | -4.176231 |
| H        |  | -5.645114 |  | 0.221813                                       |  | -2.903239 |
| H        |  | -5.962149 |  | 2.253982                                       |  | -1.590903 |
| H        |  | -5.019302 |  | 4.183495                                       |  | -0.332720 |
| H        |  | -2.533019 |  | 4.466344                                       |  | -0.166839 |
| H        |  | -1.016203 |  | 2.880096                                       |  | -1.226538 |
| H        |  | 3.476207  |  | 0.026540                                       |  | 2.578045  |
| O        |  | -0.502780 |  | -1.965255                                      |  | 3.754281  |
| H        |  | -0.903118 |  | -1.623293                                      |  | 2.910027  |
| H        |  | 0.734812  |  | -2.402654                                      |  | 5.947454  |
| H        |  | 3.074937  |  | -1.726526                                      |  | 6.508816  |
| H        |  | 4.453593  |  | -0.486964                                      |  | 4.814230  |
| Compound |  |           |  | $7_{\text{OH}^{\ominus}\text{Cl}^{\ominus}}$   |  |           |
| Atom     |  | X         |  | Y                                              |  | Z         |
| C        |  | -3.788222 |  | -2.839223                                      |  | -3.410249 |
| C        |  | -4.513981 |  | -1.673224                                      |  | -3.310649 |
| C        |  | -3.862301 |  | -0.429040                                      |  | -3.031310 |
| C        |  | -2.413346 |  | -0.357683                                      |  | -2.862538 |

|          |           |                                  |           |
|----------|-----------|----------------------------------|-----------|
| C        | -1.709080 | -1.617286                        | -3.001823 |
| C        | -2.377178 | -2.804444                        | -3.255785 |
| C        | -4.632369 | 0.737163                         | -2.901350 |
| C        | -4.061028 | 1.969621                         | -2.563846 |
| C        | -2.624179 | 2.055179                         | -2.354848 |
| C        | -1.810231 | 0.898031                         | -2.542957 |
| C        | -4.879941 | 3.136774                         | -2.410330 |
| C        | -4.331623 | 4.345808                         | -2.042122 |
| C        | -2.928036 | 4.435075                         | -1.801519 |
| C        | -2.105707 | 3.335713                         | -1.953971 |
| C        | -0.295747 | 1.040386                         | -2.406110 |
| N        | 0.232220  | 0.427455                         | -1.175269 |
| C        | 0.654098  | 1.077003                         | -0.095084 |
| C        | 1.112909  | 0.608960                         | 1.176594  |
| C        | 1.304127  | 1.999348                         | 1.674479  |
| C        | 0.883947  | 2.493404                         | 0.293892  |
| N        | 1.219583  | -0.656789                        | 1.625072  |
| O        | 1.642664  | 2.542646                         | 2.733399  |
| O        | 0.779536  | 3.595535                         | -0.260412 |
| C        | 1.803153  | -1.092460                        | 2.840187  |
| C        | 1.370206  | -2.316618                        | 3.417840  |
| C        | 1.921170  | -2.728968                        | 4.642517  |
| C        | 2.893434  | -1.957436                        | 5.291543  |
| C        | 3.343212  | -0.763600                        | 4.705333  |
| C        | 2.808176  | -0.344755                        | 3.481588  |
| H        | 0.005714  | 2.087375                         | -2.402502 |
| H        | 0.199256  | -0.592999                        | -1.164633 |
| H        | 0.934485  | -1.393431                        | 0.961999  |
| Cl       | 0.437644  | -3.175866                        | -0.275071 |
| H        | -1.051112 | 3.458577                         | -1.722826 |
| H        | -2.495969 | 5.385623                         | -1.484422 |
| H        | -4.962330 | 5.227935                         | -1.923457 |
| H        | -5.953191 | 3.039837                         | -2.585564 |
| H        | -5.712255 | 0.674009                         | -3.051457 |
| H        | -5.598647 | -1.674448                        | -3.427395 |
| H        | -4.282352 | -3.790460                        | -3.611615 |
| H        | -1.795713 | -3.723445                        | -3.342252 |
| O        | -0.334907 | -1.635688                        | -2.875057 |
| H        | -0.070080 | -2.437665                        | -2.361988 |
| H        | 3.154255  | 0.577323                         | 3.020430  |
| H        | 4.115012  | -0.164023                        | 5.188864  |
| H        | 3.306231  | -2.297119                        | 6.242287  |
| H        | 1.566510  | -3.665716                        | 5.073553  |
| O        | 0.384290  | -3.108835                        | 2.880932  |
| H        | 0.355823  | -3.068138                        | 1.890013  |
| H        | 0.206875  | 0.561850                         | -3.251696 |
| Compound |           | $\tau_{\text{OH}^- \text{Br}^-}$ |           |
| Atom     | X         | Y                                | Z         |
| C        | -4.039827 | -2.768665                        | -3.353390 |
| C        | -4.696002 | -1.567511                        | -3.200326 |
| C        | -3.963596 | -0.360769                        | -2.960485 |
| C        | -2.505301 | -0.369968                        | -2.887758 |
| C        | -1.874620 | -1.657885                        | -3.099957 |
| C        | -2.620822 | -2.805901                        | -3.309268 |
| C        | -4.658257 | 0.845277                         | -2.777308 |
| C        | -3.999615 | 2.041382                         | -2.466418 |
| C        | -2.551131 | 2.043626                         | -2.341244 |
| C        | -1.818029 | 0.846219                         | -2.591787 |
| C        | -4.739163 | 3.251494                         | -2.254787 |
| C        | -4.100936 | 4.421789                         | -1.905942 |
| C        | -2.683306 | 4.427455                         | -1.742704 |
| C        | -1.936352 | 3.284262                         | -1.950668 |

| ARTICLE  |                                   |           |           | Journal Name |
|----------|-----------------------------------|-----------|-----------|--------------|
| C        | -0.298386                         | 0.888654  | -2.487312 |              |
| N        | 0.165493                          | 0.287307  | -1.224238 |              |
| C        | 0.809871                          | 0.937488  | -0.260656 |              |
| C        | 1.293966                          | 0.524923  | 1.020181  |              |
| C        | 1.890305                          | 1.862795  | 1.283530  |              |
| C        | 1.344048                          | 2.311718  | -0.068651 |              |
| N        | 1.220473                          | -0.685160 | 1.605997  |              |
| O        | 2.564024                          | 2.390311  | 2.177695  |              |
| O        | 1.367415                          | 3.354101  | -0.737350 |              |
| C        | 1.646589                          | -1.036414 | 2.910214  |              |
| C        | 2.121919                          | -2.352077 | 3.156310  |              |
| C        | 2.578592                          | -2.685057 | 4.442703  |              |
| C        | 2.558691                          | -1.743929 | 5.479443  |              |
| C        | 2.064068                          | -0.451136 | 5.242470  |              |
| C        | 1.600445                          | -0.108854 | 3.967192  |              |
| H        | 0.077774                          | 1.910764  | -2.514989 |              |
| H        | -0.026010                         | -0.711022 | -1.102722 |              |
| H        | 0.761435                          | -1.420704 | 1.047673  |              |
| Br       | -0.038725                         | -3.169247 | -0.246832 |              |
| H        | -0.863021                         | 3.343536  | -1.789276 |              |
| H        | -2.180259                         | 5.347865  | -1.441894 |              |
| H        | -4.671201                         | 5.337473  | -1.743777 |              |
| H        | -5.824393                         | 3.219545  | -2.369819 |              |
| H        | -5.747386                         | 0.842864  | -2.858019 |              |
| H        | -5.784810                         | -1.512872 | -3.241950 |              |
| H        | -4.595550                         | -3.692089 | -3.520887 |              |
| H        | -2.094526                         | -3.750843 | -3.450588 |              |
| O        | -0.496221                         | -1.743468 | -3.097447 |              |
| H        | -0.232379                         | -2.517330 | -2.543702 |              |
| H        | 1.210892                          | 0.888265  | 3.773338  |              |
| H        | 2.026533                          | 0.285020  | 6.045860  |              |
| H        | 2.918544                          | -2.025374 | 6.469918  |              |
| H        | 2.951945                          | -3.696130 | 4.608313  |              |
| O        | 2.231140                          | -3.325682 | 2.193452  |              |
| H        | 1.610112                          | -3.196855 | 1.433537  |              |
| H        | 0.164044                          | 0.347035  | -3.315696 |              |
| Compound | $\tau_{\text{OH}^-\text{NO}_3^-}$ |           |           |              |
| Atom     | X                                 | Y         | Z         |              |
| C        | -3.785652                         | -2.745152 | -4.305929 |              |
| C        | -4.504565                         | -1.671004 | -3.826350 |              |
| C        | -3.843866                         | -0.529912 | -3.264603 |              |
| C        | -2.390072                         | -0.492762 | -3.216697 |              |
| C        | -1.687230                         | -1.639780 | -3.721088 |              |
| C        | -2.359830                         | -2.726361 | -4.244786 |              |
| C        | -4.580737                         | 0.544799  | -2.743623 |              |
| C        | -3.950413                         | 1.656503  | -2.161121 |              |
| C        | -2.498431                         | 1.712954  | -2.115286 |              |
| C        | -1.738765                         | 0.642861  | -2.662964 |              |
| C        | -4.717137                         | 2.733079  | -1.606753 |              |
| C        | -4.099551                         | 3.817953  | -1.020510 |              |
| C        | -2.674841                         | 3.878421  | -0.967889 |              |
| C        | -1.901536                         | 2.863989  | -1.498720 |              |
| C        | -0.224536                         | 0.679864  | -2.584293 |              |
| N        | 0.237357                          | 0.148013  | -1.285269 |              |
| C        | 0.919670                          | 0.861574  | -0.389521 |              |
| C        | 1.302157                          | 0.613853  | 0.965692  |              |
| C        | 1.978939                          | 1.936399  | 1.069282  |              |
| C        | 1.594502                          | 2.185617  | -0.386780 |              |
| N        | 1.025854                          | -0.422748 | 1.774545  |              |
| O        | 2.569620                          | 2.575806  | 1.947492  |              |
| O        | 1.736617                          | 3.106503  | -1.203591 |              |
| C        | 1.596896                          | -0.651625 | 3.052073  |              |



| Journal Name | ARTICLE   |           |           |
|--------------|-----------|-----------|-----------|
| C            | 0.797341  | -1.227126 | 4.072709  |
| C            | 1.375438  | -1.485620 | 5.328956  |
| C            | 2.714633  | -1.165017 | 5.581170  |
| C            | 3.503735  | -0.587140 | 4.572377  |
| C            | 2.944717  | -0.345193 | 3.312563  |
| H            | 0.231788  | 0.092296  | -3.388513 |
| H            | 0.167047  | 1.695282  | -2.682661 |
| H            | -0.178687 | -0.735131 | -0.971903 |
| H            | 0.381380  | -1.134599 | 1.388713  |
| N            | -2.047035 | -1.646377 | 0.736331  |
| O            | -2.170723 | -0.977550 | 1.813475  |
| O            | -3.038334 | -1.913350 | 0.029517  |
| O            | -0.873749 | -2.038843 | 0.382255  |
| H            | 3.548991  | 0.078349  | 2.512194  |
| O            | -0.516365 | -1.564087 | 3.911594  |
| H            | -0.920800 | -1.243025 | 3.060719  |
| H            | 0.747516  | -1.926850 | 6.103716  |
| H            | 3.139910  | -1.368139 | 6.564951  |
| H            | 4.549704  | -0.341367 | 4.757459  |
| H            | -0.819807 | 2.952835  | -1.439962 |
| H            | -2.189370 | 4.737666  | -0.502594 |
| H            | -4.693008 | 4.629494  | -0.597299 |
| H            | -5.806014 | 2.671108  | -1.655275 |
| H            | -5.671938 | 0.508710  | -2.778137 |
| H            | -5.595928 | -1.672984 | -3.856649 |
| H            | -4.298926 | -3.611137 | -4.725979 |
| H            | -1.794306 | -3.583499 | -4.613199 |
| H            | -0.600088 | -1.674240 | -3.683343 |

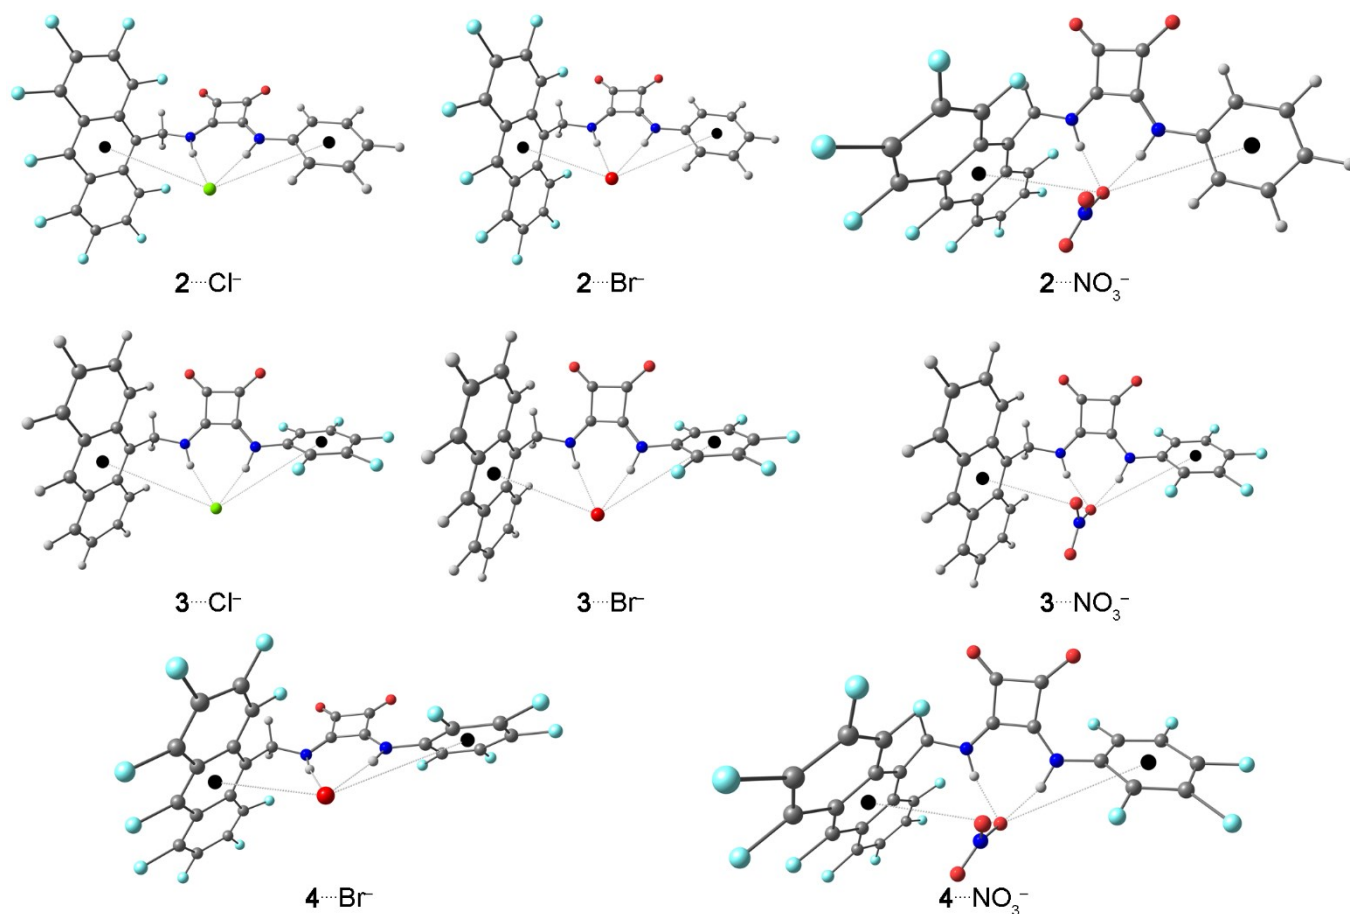

**Figure S1.** Optimized geometries of selected complexes: (**2** and **3**)...Cl<sup>-</sup>, Br<sup>-</sup> and NO<sub>3</sub><sup>-</sup>) and 4...Br<sup>-</sup> and NO<sub>3</sub><sup>-</sup>). Dotted lines were included to highlight the bond lengths of the main hydrogen bonds and anion- $\pi$  interactions organized in the Table 1. Black dots represent the centroid of the aromatic ring in the anthracene and benzene structures. Atoms color code: H = white; C = gray; N = blue; O = red; F = light blue; Cl = green; and Br = light red.

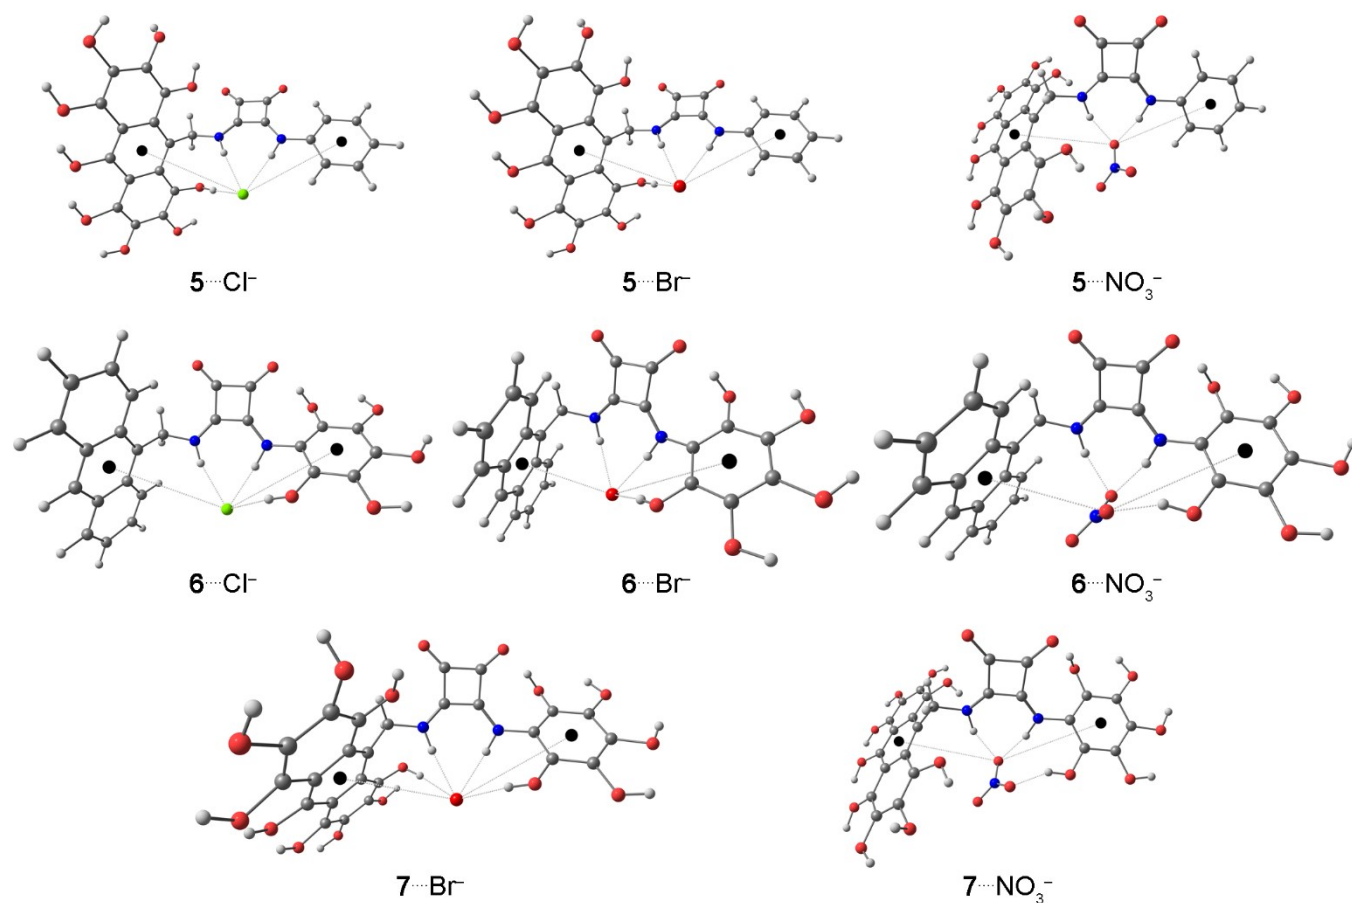

**Figure S2.** Optimized geometries of selected complexes: (5 and 7)...(Cl<sup>-</sup>, Br<sup>-</sup> and NO<sub>3</sub><sup>-</sup>) and 7...(Br<sup>-</sup> and NO<sub>3</sub><sup>-</sup>). Dotted lines were included to highlight the bond lengths of the main hydrogen bonds and anion- $\pi$  interactions organized in the Table 1. Black dots represent the centroid of the aromatic ring in the anthracene and benzene structures. Atoms color code: H = white; C = gray; N = blue; O = red; Cl = green; and Br = light red.

**Table S2.** Selected APT atomic charges (a.u.) in the complexes studied.

| Complex                          | $q_{A-H}^{[a]}$ | $q_{B-H}^{[b]}$ | $q_{O-H}^{[c]}$ | $q_{Total(H)}^{[d]}$ | $q_{Anion}^{[e]}$ | $q_D^{[f]}$ |
|----------------------------------|-----------------|-----------------|-----------------|----------------------|-------------------|-------------|
| 1...Cl <sup>-</sup>              | 0.452           | 0.481           | –               | 0.933                | –1.074            | 2.007       |
| 1...Br <sup>-</sup>              | 0.459           | 0.491           | –               | 0.951                | –1.044            | 1.995       |
| 1...NO <sub>3</sub> <sup>-</sup> | 0.406           | 0.454           | –               | 0.860                | –1.119            | 1.979       |
| 2...Cl <sup>-</sup>              | 0.464           | 0.474           | –               | 0.938                | –1.076            | 2.014       |
| 2...Br <sup>-</sup>              | 0.475           | 0.459           | –               | 0.934                | –1.048            | 1.982       |
| 2...NO <sub>3</sub> <sup>-</sup> | 0.406           | 0.449           | –               | 0.855                | –1.117            | 1.972       |
| 3...Cl <sup>-</sup>              | 0.446           | 0.577           | –               | 1.023                | –1.077            | 2.100       |
| 3...Br <sup>-</sup>              | 0.461           | 0.59            | –               | 1.051                | –1.042            | 2.093       |
| 3...NO <sub>3</sub> <sup>-</sup> | 0.392           | 0.535           | –               | 0.927                | –1.131            | 2.058       |
| 4...Cl <sup>-</sup>              | 0.461           | 0.563           | –               | 1.024                | –1.079            | 2.103       |
| 4...Br <sup>-</sup>              | 0.471           | 0.565           | –               | 1.036                | –1.051            | 2.087       |
| 4...NO <sub>3</sub> <sup>-</sup> | 0.381           | 0.533           | –               | 0.914                | –1.123            | 2.037       |
| 5...Cl <sup>-</sup>              | 0.406           | 0.424           | 0.638           | 1.468                | –1.099            | 2.567       |
| 5...Br <sup>-</sup>              | 0.437           | 0.446           | 0.611           | 1.494                | –1.060            | 2.554       |
| 5...NO <sub>3</sub> <sup>-</sup> | 0.392           | 0.502           | –               | 0.894                | –1.141            | 2.035       |
| 6...Cl <sup>-</sup>              | 0.418           | 0.462           | 0.609           | 1.489                | –1.085            | 2.574       |
| 6...Br <sup>-</sup>              | 0.443           | 0.451           | 0.626           | 1.520                | –1.028            | 2.548       |
| 6...NO <sub>3</sub> <sup>-</sup> | 0.366           | 0.443           | 0.632           | 1.441                | –1.055            | 2.496       |
| 7...Cl <sup>-</sup>              | 0.398           | 0.422           | 1.160           | 1.980                | –1.133            | 3.113       |
| 7...Br <sup>-</sup>              | 0.437           | 0.421           | 1.156           | 2.014                | –1.082            | 3.096       |
| 7...NO <sub>3</sub> <sup>-</sup> | 0.380           | 0.463           | 0.654           | 1.497                | –1.078            | 2.575       |

<sup>[a]</sup> APT charge related to hydrogen atom in the –NH group closer to the anthracene ring; <sup>[b]</sup> APT charge of the hydrogen atom in the –NH group closer to the benzene ring; <sup>[c]</sup> APT charge of the hydrogen atoms in the –OH groups closer to anion; <sup>[d]</sup>  $q_{Total(H)} = q_{A-H} + q_{B-H} + q_{O-H}$ ; <sup>[e]</sup> APT charge of Cl<sup>-</sup>, Br<sup>-</sup>, and the oxygen atom of the NO<sub>3</sub><sup>-</sup> anion in the closest position to the –NH groups; <sup>[f]</sup>  $q_D = q_{A-H} + q_{B-H} + q_{O-H} - q_{Anion}$ .

To evaluate the importance of the electrostatic interactions between the hydrogen atom of the groups –NH and –OH, in the receptors **1–7**, and the anions Cl<sup>-</sup>, Br<sup>-</sup> and NO<sub>3</sub><sup>-</sup>, the APT atomic charges of: i) the hydrogen atom of the –NH group closer to anthracene ring,  $q_{A-H}$ ; ii) the hydrogen atom of the –NH group closer to benzene ring,  $q_{B-H}$ ; iii) the hydrogen atom of the –OH group closer to anion; and iv) Cl<sup>-</sup>, Br<sup>-</sup>, and of the oxygen atom of the NO<sub>3</sub><sup>-</sup> anion in the closest position to –NH/–OH groups,  $q_{Anion}$ , are organized in the Table S2. The values of:  $q_D = q_{A-H} + q_{B-H} + q_{O-H} - q_{Anion}$  (Table S2), will be used as base to establish the strength of these local electrostatic interactions and will be compared with the values obtained to  $\Delta V_{elstat}$  energy in the bonds (**1–7**)... (Cl<sup>-</sup>, Br<sup>-</sup> and NO<sub>3</sub><sup>-</sup>).

The H → F substitutions in the anthracene ring (**1** → **2**) increase the value of  $q_D$  from **1**...Cl<sup>-</sup> to **2**...Cl<sup>-</sup>. However, the opposite trend is visualized from **1**...Br<sup>-</sup> and **1**...NO<sub>3</sub><sup>-</sup> to **2**...Br<sup>-</sup> and **2**...NO<sub>3</sub><sup>-</sup>, respectively. It occurs because in **1**...Cl<sup>-</sup> → **2**...Cl<sup>-</sup> there is an increase in the value of  $q_{A-H}$ , which counterbalance the decrease in the value of  $q_{B-H}$ . However, in **1**...Br<sup>-</sup> → **2**...Br<sup>-</sup> and **1**...NO<sub>3</sub><sup>-</sup> → **2**...NO<sub>3</sub><sup>-</sup> there is not an relevant increase of  $q_{A-H}$ , which counterbalance the decrease in the value of  $q_{B-H}$ . These data show that the H → F substitutions favor only the electrostatic interaction anthracene–NH...Cl<sup>-</sup>, in agreement with the more favorable  $\Delta V_{elstat}$  energy in **2**...Cl<sup>-</sup> compared to **1**...Cl<sup>-</sup>. For Br<sup>-</sup> and NO<sub>3</sub><sup>-</sup> recognition, the H → F substitutions favor the anion– $\pi$  interactions, which promote more favorable values of the  $\Delta V_{elstat}$  component in **2**...Br<sup>-</sup> and **2**...NO<sub>3</sub><sup>-</sup> regarding to **1**...Br<sup>-</sup> and **1**...NO<sub>3</sub><sup>-</sup>, respectively. The H → F substitutions in the benzene ring (**1** → **3**) promote a relevant increase in the values of  $q_{B-H}$  and are responsible by larger values of  $q_D$  and more stabilizing values of the  $\Delta V_{elstat}$  term in the structures **3**... (Cl<sup>-</sup>, Br<sup>-</sup> and NO<sub>3</sub><sup>-</sup>) regarding to **1**... (Cl<sup>-</sup>, Br<sup>-</sup> and NO<sub>3</sub><sup>-</sup>). This same trend is observed when the H → F substitutions occur in the both rings: anthracene and benzene (**1** → **4**).

The –OH substituted structures (**5–7**)... (Cl<sup>-</sup>, Br<sup>-</sup> and NO<sub>3</sub><sup>-</sup>) have larger values of  $q_D$  and more favorable values of the  $\Delta V_{elstat}$  term compared to non-substituted complexes **1**... (Cl<sup>-</sup>, Br<sup>-</sup> and NO<sub>3</sub><sup>-</sup>). The presence of –OH groups did not polarize the interactions –NH... (Cl<sup>-</sup>, Br<sup>-</sup> and NO<sub>3</sub><sup>-</sup>), as can be observed by lower values of  $q_{A-H}$  and  $q_{B-H}$  in the complexes (**5–7**)... (Cl<sup>-</sup>, Br<sup>-</sup> and NO<sub>3</sub><sup>-</sup>) regarding

to  $\mathbf{1}\cdots(\text{Cl}^-, \text{Br}^- \text{ and } \text{NO}_3^-)$ . Exceptionally, the presence of  $-\text{OH}$  groups in the anthracene ring of the complex  $\mathbf{5}\cdots\text{NO}_3^-$  polarizes the interaction  $\text{benzene}-\text{O}-\text{H}\cdots\text{NO}_3^-$ . However, in general, the  $-\text{OH}$  groups provide the hydrogen atoms, which can establish electrostatic interactions with the anions  $\text{Cl}^-$ ,  $\text{Br}^-$  and  $\text{NO}_3^-$ . It explains the larger values of  $q_D$  in the structures  $(\mathbf{5}-\mathbf{7})\cdots(\text{Cl}^-, \text{Br}^- \text{ and } \text{NO}_3^-)$  than in the complexes  $\mathbf{1}\cdots(\text{Cl}^-, \text{Br}^- \text{ and } \text{NO}_3^-)$ . On the whole, the  $\text{H} \rightarrow \text{OH}$  substitutions promote larger values of  $q_D$  and more attractive  $\Delta V_{\text{elstat}}$  energy than  $\text{H} \rightarrow \text{F}$  substitutions from the comparison of the structures  $(\mathbf{5}-\mathbf{7})\cdots(\text{Cl}^-, \text{Br}^- \text{ and } \text{NO}_3^-)$  concerning to  $(\mathbf{2}-\mathbf{4})\cdots(\text{Cl}^-, \text{Br}^- \text{ and } \text{NO}_3^-)$ . As exception, the interaction  $\mathbf{5}\cdots\text{NO}_3^-$  appears with a less attractive value of the  $\Delta V_{\text{elstat}}$  component than the bond  $\mathbf{2}\cdots\text{NO}_3^-$  due to the anion- $\pi$  interaction between anthracene ring present in the receptor  $\mathbf{2}$  and the anion  $\text{NO}_3^-$  and the absence of an  $-\text{OH}$  group in the receptor  $\mathbf{5}$  with suitable orientation to interact with the anion  $\text{NO}_3^-$ , as highlighted from the discussion realized using the MEP surfaces.

The values of  $q_D$  in the interactions  $(\mathbf{1}-\mathbf{7})\cdots\text{Cl}^-$  are larger than in the bonds  $(\mathbf{1}-\mathbf{7})\cdots\text{Br}^-$ . It indicates that the local electrostatic interactions  $-\text{NH}\cdots\text{Cl}^-$  are more favorable than the bonds  $-\text{NH}\cdots\text{Br}^-$ . Overall, it agrees with the more attractive values of the  $\Delta V_{\text{elstat}}$  component in the structures  $(\mathbf{1}-\mathbf{7})\cdots\text{Cl}^-$  regarding to complexes  $(\mathbf{1}-\mathbf{7})\cdots\text{Br}^-$ . The exceptions are the molecules  $\mathbf{2}\cdots\text{Cl}^-$  and  $\mathbf{4}\cdots\text{Cl}^-$  with less favorable values of the  $\Delta V_{\text{elstat}}$  term in relation to complexes  $\mathbf{2}\cdots\text{Br}^-$  and  $\mathbf{4}\cdots\text{Br}^-$ , respectively. This trend, as mentioned in the analysis of the MEP surfaces, is, probably, due to the bromide anion preferentially interacting with the  $\pi$ -acid region presents in the receptors  $\mathbf{2}$  and  $\mathbf{4}$ , regarding to chloride anion. The bonds  $(\mathbf{1}-\mathbf{7})\cdots\text{Cl}^-$  show larger values of  $q_D$  and more attractive values of the  $\Delta V_{\text{elstat}}$  energy compared to interactions  $(\mathbf{1}-\mathbf{7})\cdots\text{NO}_3^-$ . Here, the more favorable electrostatic interactions  $-\text{NH}\cdots\text{Cl}^-$  than the bonds  $-\text{NH}\cdots\text{NO}_3^-$  appear as decisive to establish the more attractive electrostatic interactions in the structures  $(\mathbf{1}-\mathbf{7})\cdots\text{Cl}^-$  concerning to compounds  $(\mathbf{1}-\mathbf{7})\cdots\text{NO}_3^-$ . The interactions  $(\mathbf{1}-\mathbf{7})\cdots\text{Br}^-$  show in relation to bonds  $(\mathbf{1}-\mathbf{7})\cdots\text{NO}_3^-$  the same tendency in relation to the comparison between the complexes  $(\mathbf{1}-\mathbf{7})\cdots\text{Cl}^-$  and  $(\mathbf{1}-\mathbf{7})\cdots\text{NO}_3^-$ , using the parameters  $q_D$  and  $\Delta V_{\text{elstat}}$ .

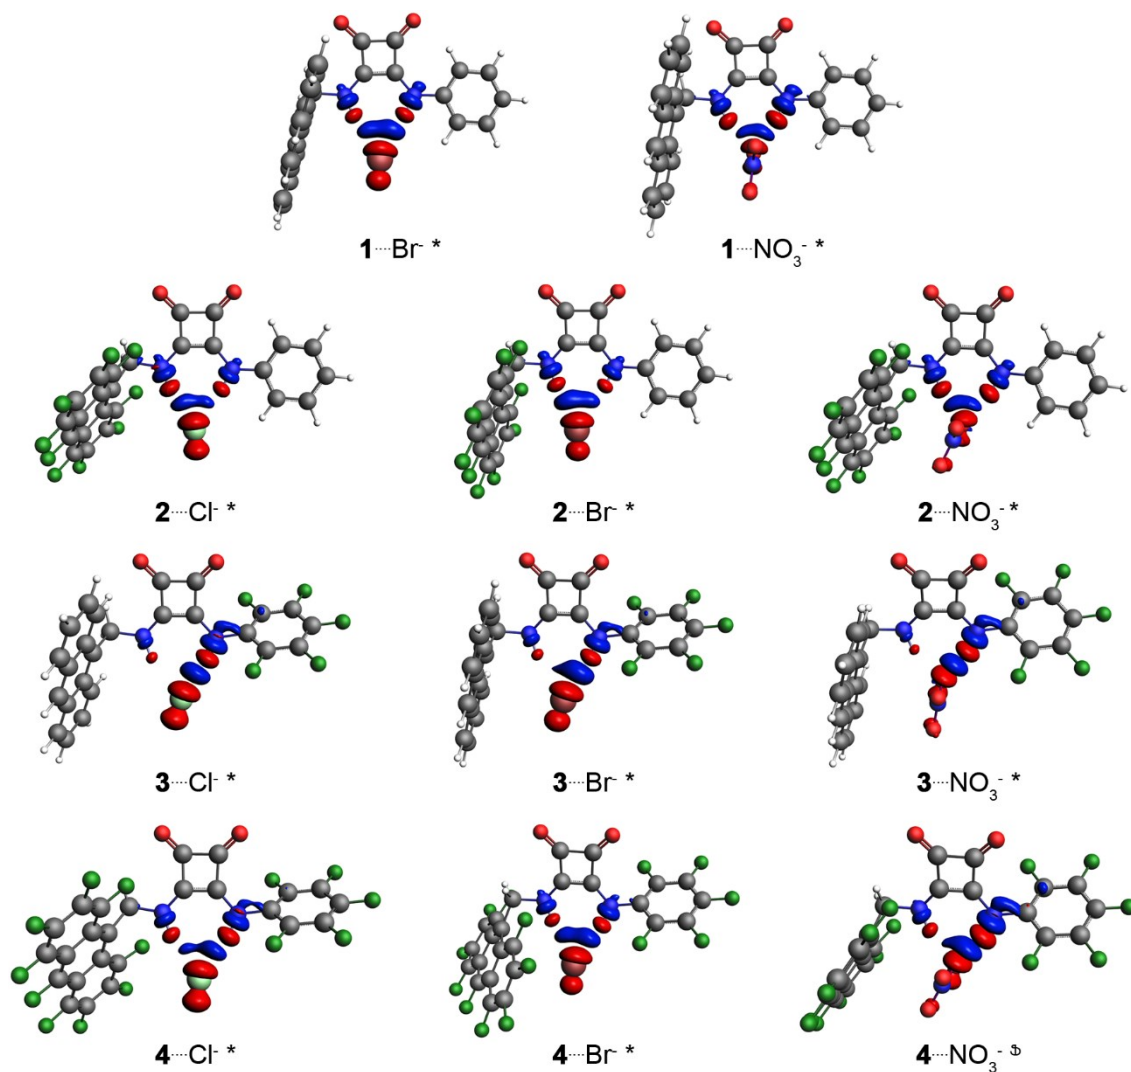

**Figure S3.** The first density deformation channel surface plots,  $\Delta\rho_1$ , related to interactions between the receptors (1–4) and anions ( $\text{Cl}^-$ ,  $\text{Br}^-$  and  $\text{NO}_3^-$ ). Red and blue regions indicate the electronic density outflow and inflow, respectively. The isovalue used to represent these surfaces is: <sup>\*</sup> = 0.002; and <sup>b</sup> = 0.015 a.u. Atoms color code: H = white; C = gray; N = blue; O = red; F = green; Cl = light green; and Br = brown.

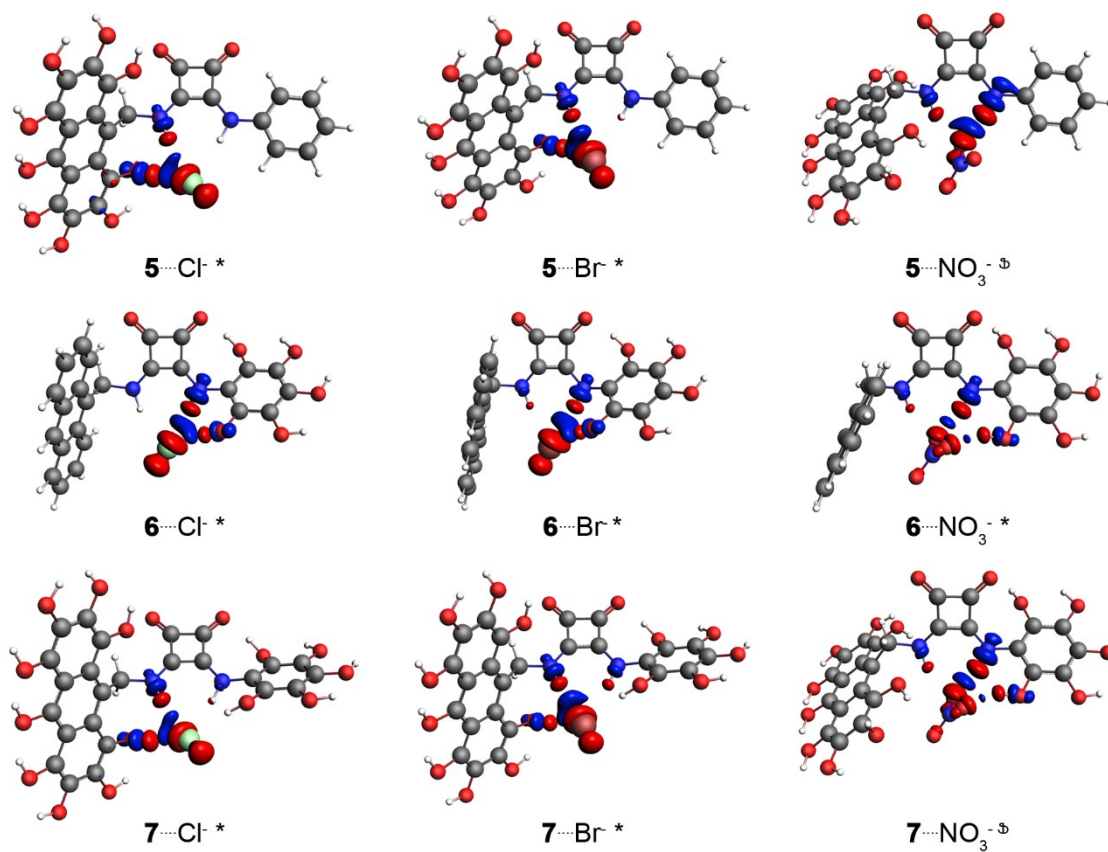

**Figure S4.** The first density deformation channel surface plots,  $\Delta\rho_1$ , related to interactions between the receptors (5–7) and anions ( $\text{Cl}^-$ ,  $\text{Br}^-$  and  $\text{NO}_3^-$ ). Red and blue regions indicate the electronic density outflow and inflow, respectively. The isovalue used to represent these surfaces is: \* = 0.002; and <sup>b</sup> = 0.015 a.u. Atoms color code: H = white; C = gray; N = blue; O = red; Cl = light green; and Br = brown.

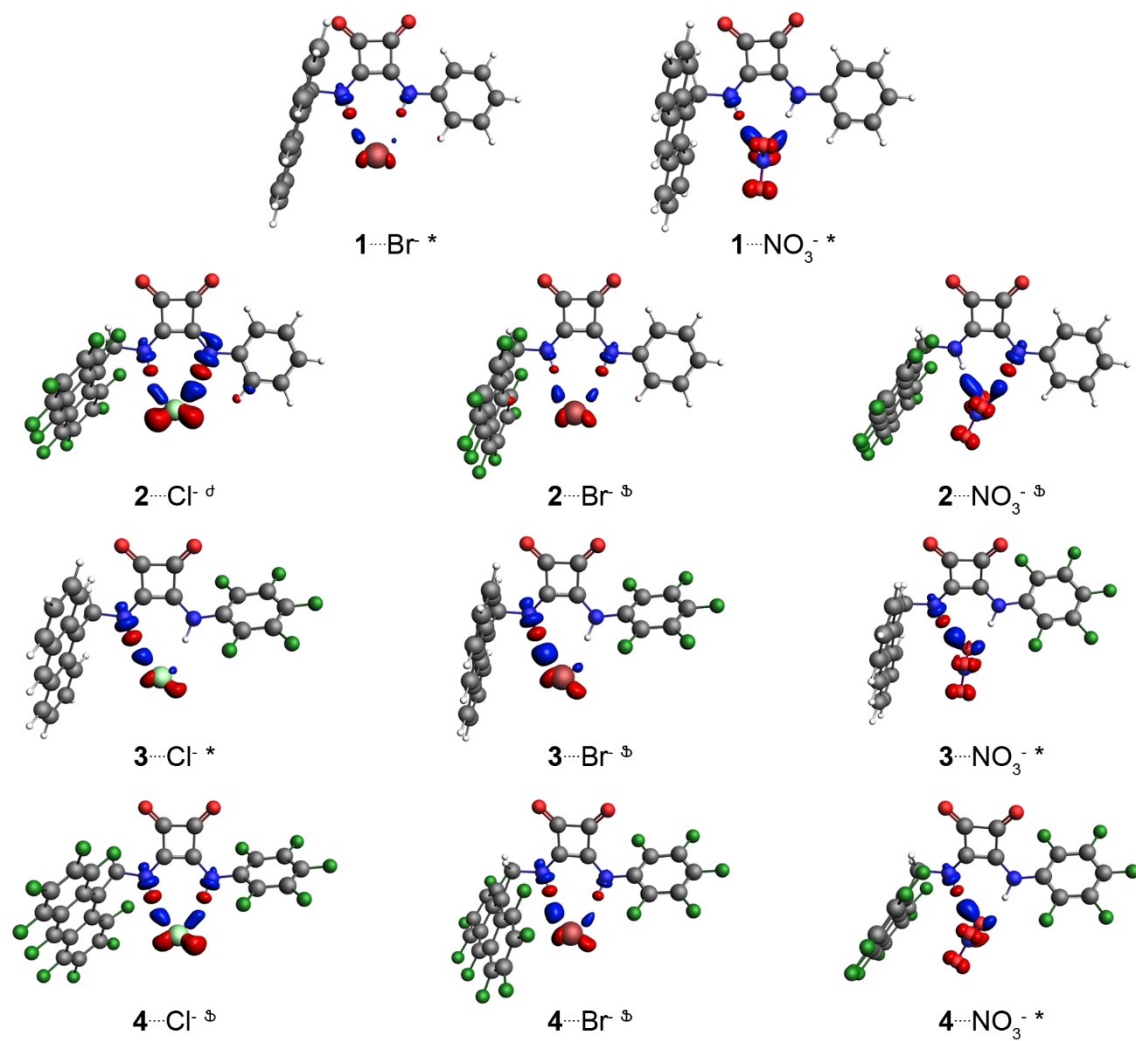

**Figure S5.** The second density deformation channel surface plots,  $\Delta\rho_2$ , related to interactions between the receptors (1–4) and anions ( $\text{Cl}^-$ ,  $\text{Br}^-$  and  $\text{NO}_3^-$ ). Red and blue regions indicate the electronic density outflow and inflow, respectively. The isovalue used to represent these surfaces is: \* = 0.002; <sup>d</sup> = 0.015; and <sup>d</sup> = 0.010 a.u. Atoms color code: H = white; C = gray; N = blue; O = red; F = green; Cl = light green; and Br = brown.



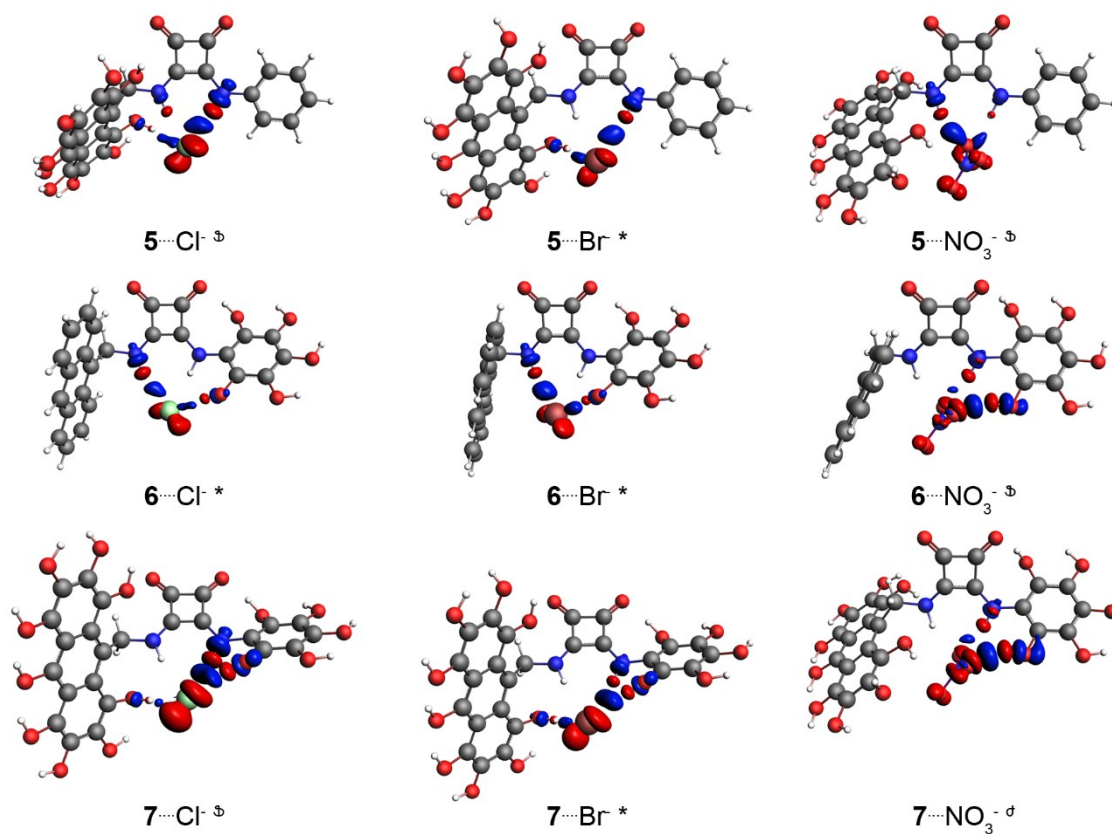

**Figure S6.** The second density deformation channel surface plots,  $\Delta\rho_2$ , related to interactions between the receptors (5–7) and anions (Cl<sup>-</sup>, Br<sup>-</sup> and NO<sub>3</sub><sup>-</sup>). Red and blue regions indicate the electronic density outflow and inflow, respectively. The isovalue used to represent these surfaces is: \* = 0.002; <sup>Ⓛ</sup> = 0.015; and <sup>Ⓢ</sup> = 0.010 a.u. Atoms color code: H = white; C = gray; N = blue; O = red; Cl = light green; and Br = brown.

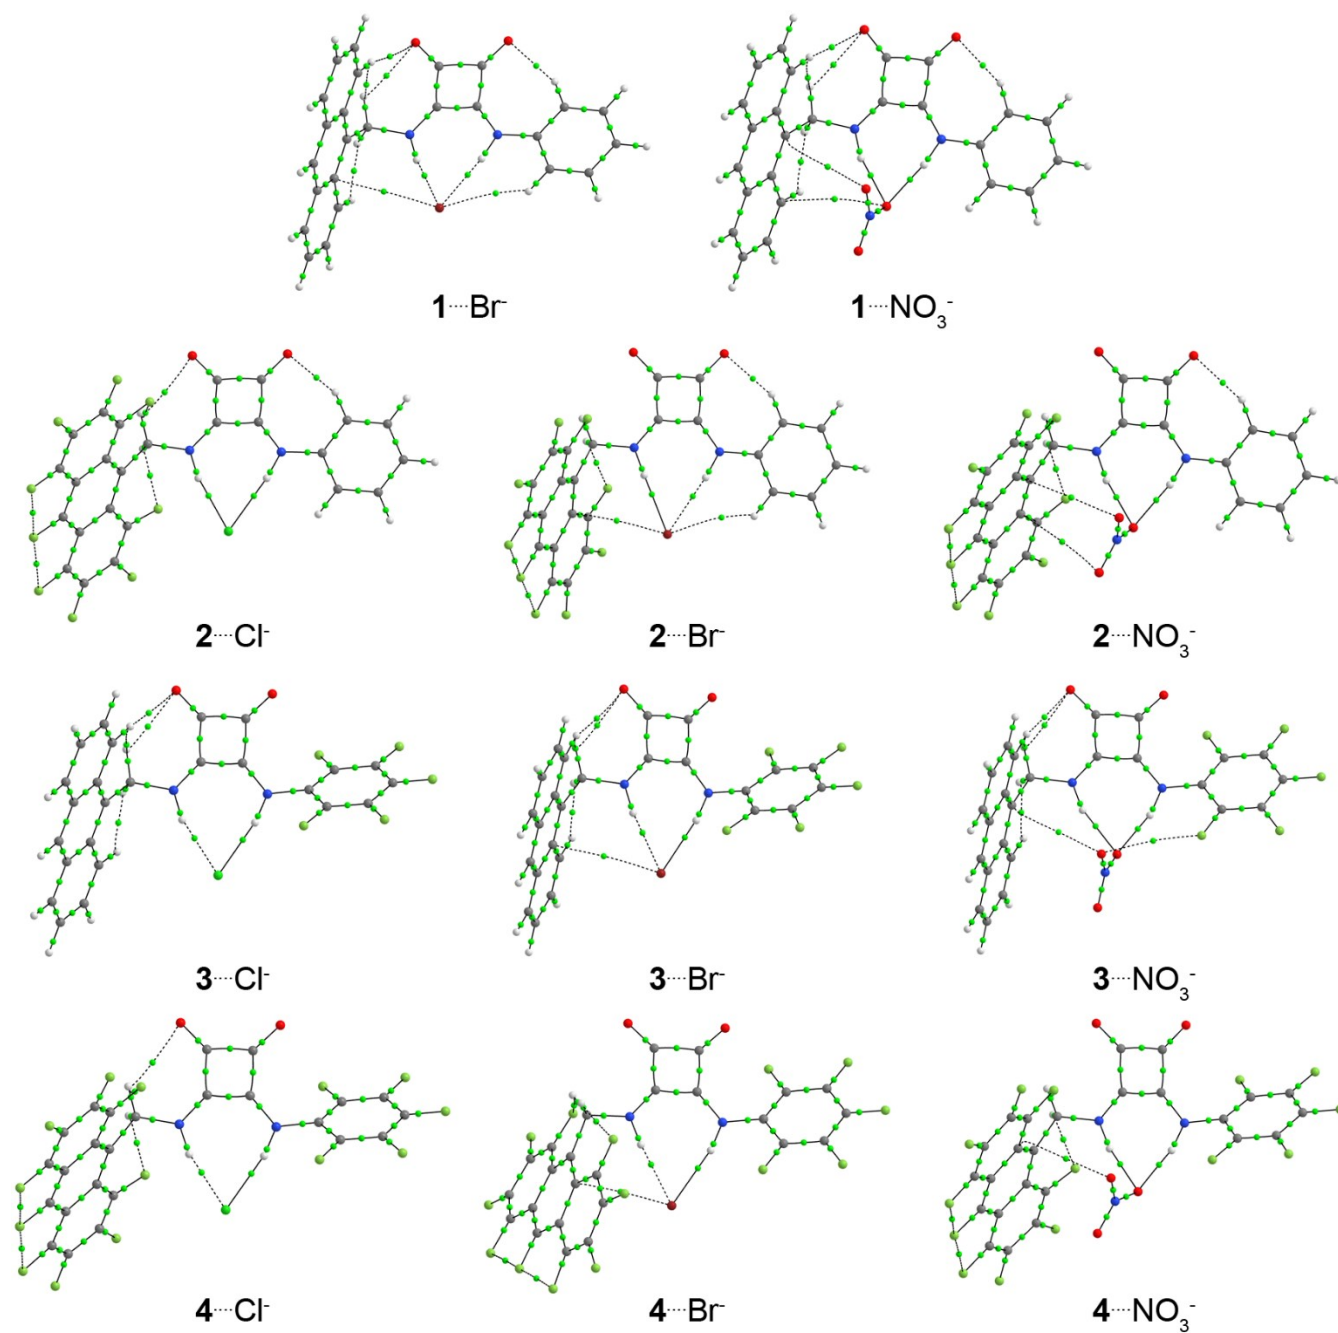

**Figure S7.** Topological map containing the bond paths (continuous or dashed lines connecting the cores) and bond critical points (small light green points) related to interactions between the receptors (**1–4**) and anions (Cl<sup>-</sup>, Br<sup>-</sup> and NO<sub>3</sub><sup>-</sup>). Atoms color code: H = white; C = gray; N = blue; O = red; F = green; Cl = light green; and Br = brown.

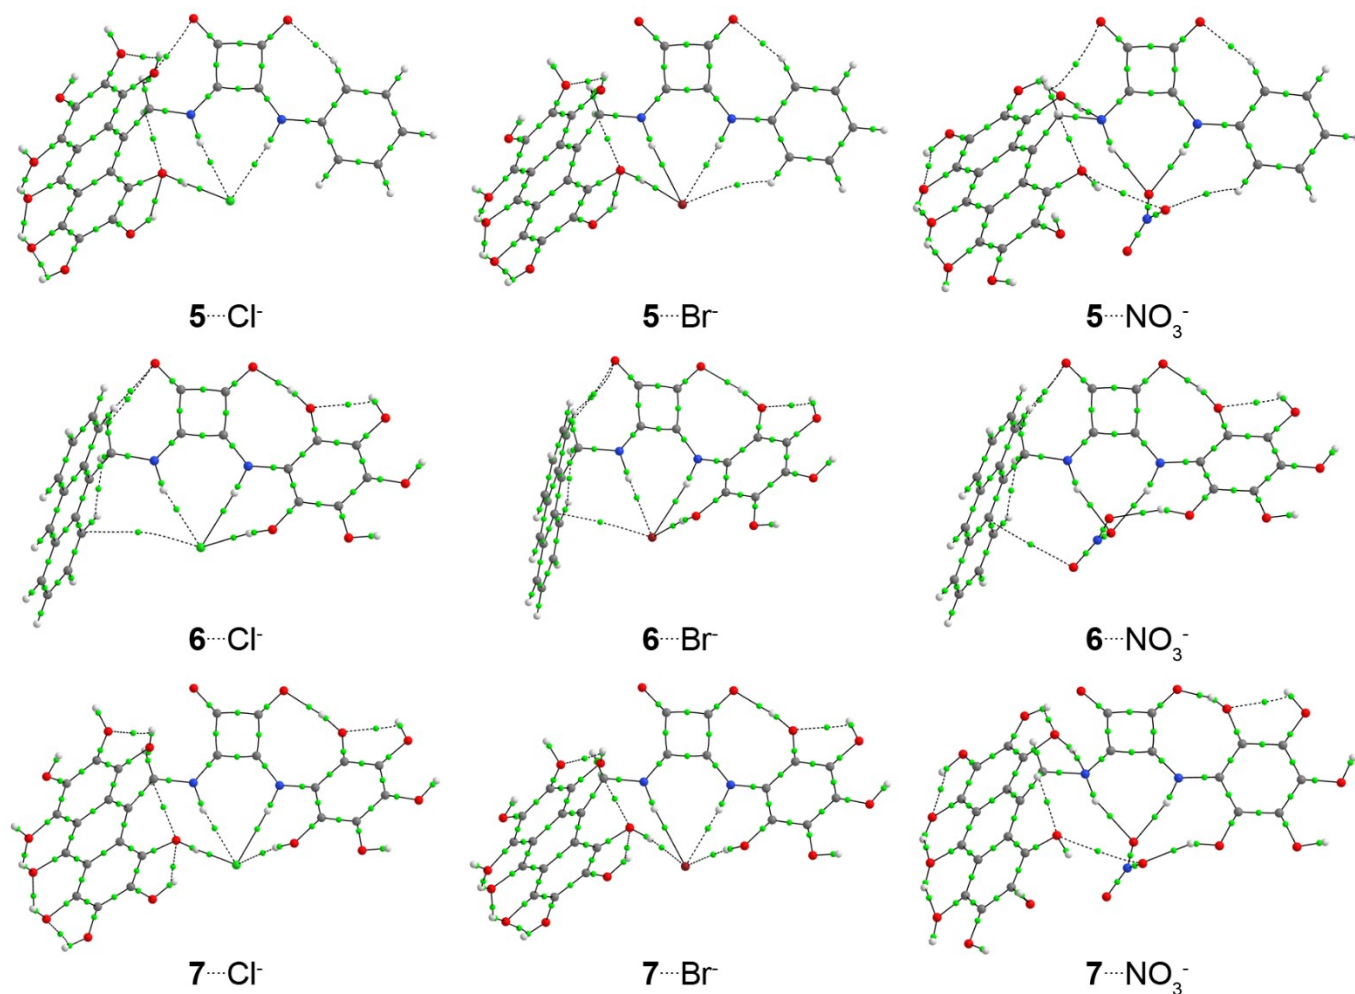

**Figure S8.** Topological map containing the bond paths (continuous or dashed lines connecting the cores) and bond critical points (small light green points) related to interactions between the receptors (5-7) and anions (Cl<sup>-</sup>, Br<sup>-</sup> and NO<sub>3</sub><sup>-</sup>). Atoms color code: H = white; C = gray; N = blue; O = red; Cl = light green; and Br = brown.

**Table S3.** Ratio between the kinetic energy density,  $G_b$ , and potential energy density,  $V_b$ ,  $-G_b/V_b$ , and electron density,  $\rho_b$ , at BCPs related to interactions between the receptors (1–4) and anions ( $\text{Cl}^-$ ,  $\text{Br}^-$  and  $\text{NO}_3^-$ ). The values of all the parameters are in a.u.

| Complex                          | BCP                            | $-G_b/V_b$ | $\rho_b$ |
|----------------------------------|--------------------------------|------------|----------|
| 1...Cl <sup>-</sup>              | C...Cl <sup>-</sup>            | 1.304      | 0.002    |
|                                  | N(1)–H(1)...Cl <sup>-[a]</sup> | 0.965      | 0.024    |
|                                  | N(2)–H(2)...Cl <sup>-[b]</sup> | 0.941      | 0.027    |
| 1...Br <sup>-</sup>              | C...Br <sup>-</sup>            | 1.229      | 0.005    |
|                                  | N(1)–H(1)...Br <sup>-[a]</sup> | 0.978      | 0.024    |
|                                  | N(2)–H(2)...Br <sup>-[b]</sup> | 0.960      | 0.025    |
|                                  | C–H...Br <sup>-</sup>          | 1.323      | 0.006    |
| 1...NO <sub>3</sub> <sup>-</sup> | C...O <sup>-</sup>             | 1.389      | 0.002    |
|                                  | N(1)–H(1)...O <sup>-[a]</sup>  | 1.392      | 0.003    |
|                                  | N(2)–H(2)...O <sup>-[b]</sup>  | 0.957      | 0.029    |
| 2...Cl <sup>-</sup>              | N(1)–H(1)...Cl <sup>-[a]</sup> | 0.947      | 0.026    |
|                                  | N(2)–H(2)...Cl <sup>-[b]</sup> | 0.956      | 0.025    |
|                                  | C...Br <sup>-</sup>            | 1.238      | 0.007    |
| 2...Br <sup>-</sup>              | N(1)–H(1)...Br <sup>-[a]</sup> | 0.941      | 0.027    |
|                                  | N(2)–H(2)...Br <sup>-[b]</sup> | 0.999      | 0.021    |
|                                  | C–H...Br <sup>-</sup>          | 1.336      | 0.006    |
|                                  | C...O <sup>-</sup>             | 1.425      | 0.002    |
| 2...NO <sub>3</sub> <sup>-</sup> | N(1)–H(1)...O <sup>-[a]</sup>  | 1.425      | 0.002    |
|                                  | N(2)–H(2)...O <sup>-[b]</sup>  | 0.960      | 0.033    |
|                                  | N(2)–H(2)...O <sup>-[b]</sup>  | 0.945      | 0.030    |
| 3...Cl <sup>-</sup>              | N(1)–H(1)...Cl <sup>-[a]</sup> | 0.986      | 0.023    |
|                                  | N(2)–H(2)...Cl <sup>-[b]</sup> | 0.912      | 0.031    |
| 3...Br <sup>-</sup>              | C...Br <sup>-</sup>            | 1.228      | 0.005    |
|                                  | N(1)–H(1)...Br <sup>-[a]</sup> | 0.988      | 0.023    |
|                                  | N(2)–H(2)...Br <sup>-[b]</sup> | 0.923      | 0.029    |
| 3...NO <sub>3</sub> <sup>-</sup> | C...O <sup>-</sup>             | 1.364      | 0.003    |
|                                  | N(1)–H(1)...O <sup>-[a]</sup>  | 0.960      | 0.027    |
|                                  | N(2)–H(2)...O <sup>-[b]</sup>  | 0.957      | 0.036    |
|                                  | C–F...O <sup>-</sup>           | 1.681      | 0.002    |
| 4...Cl <sup>-</sup>              | N(1)–H(1)...Cl <sup>-[a]</sup> | 0.963      | 0.025    |
|                                  | N(2)–H(2)...Cl <sup>-[b]</sup> | 0.924      | 0.029    |
| 4...Br <sup>-</sup>              | C...Br <sup>-</sup>            | 1.243      | 0.007    |
|                                  | N(1)–H(1)...Br <sup>-[a]</sup> | 0.965      | 0.025    |
|                                  | N(2)–H(2)...Br <sup>-[b]</sup> | 0.954      | 0.025    |
| 4...NO <sub>3</sub> <sup>-</sup> | C...O <sup>-</sup>             | 1.334      | 0.003    |
|                                  | N(1)–H(1)...O <sup>-[a]</sup>  | 0.964      | 0.028    |
|                                  | N(2)–H(2)...O <sup>-[b]</sup>  | 0.955      | 0.034    |

<sup>[a]</sup> BCP related to –NH group closer to anthracene ring; <sup>[b]</sup> BCP related to –NH group closer to benzene ring.

**Table S4.** Ratio between the kinetic energy density,  $G_b$ , and potential energy density,  $V_b$ ,  $-G_b/V_b$ , and electron density,  $\rho_b$ , at BCPs related to interactions between the receptors (5–7) and anions ( $\text{Cl}^-$ ,  $\text{Br}^-$  and  $\text{NO}_3^-$ ). The values of all the parameters are in a.u.

| Complex                 | BCP                                          | $-G_b/V_b$ | $\rho_b$ |
|-------------------------|----------------------------------------------|------------|----------|
| 5 $\cdots\text{Cl}^-$   | O–H $\cdots\text{Cl}^-$                      | 0.899      | 0.032    |
|                         | N(1)–H(1) $\cdots\text{Cl}^-$ <sup>[a]</sup> | 0.979      | 0.023    |
|                         | N(2)–H(2) $\cdots\text{Cl}^-$ <sup>[b]</sup> | 1.011      | 0.021    |
| 5 $\cdots\text{Br}^-$   | O–H $\cdots\text{Br}^-$                      | 0.928      | 0.028    |
|                         | N(1)–H(1) $\cdots\text{Br}^-$ <sup>[a]</sup> | 0.960      | 0.026    |
|                         | N(2)–H(2) $\cdots\text{Br}^-$ <sup>[b]</sup> | 1.008      | 0.021    |
|                         | C–H $\cdots\text{Br}^-$                      | 1.354      | 0.005    |
| 5 $\cdots\text{NO}_3^-$ | C–HO $\cdots\text{O}^-$                      | 1.154      | 0.008    |
|                         | N(1)–H(1) $\cdots\text{O}^-$ <sup>[a]</sup>  | 0.976      | 0.026    |
|                         | N(2)–H(2) $\cdots\text{O}^-$ <sup>[b]</sup>  | 0.950      | 0.035    |
|                         | C–H $\cdots\text{O}^-$                       | 1.458      | 0.003    |
| 6 $\cdots\text{Cl}^-$   | C $\cdots\text{Cl}^-$                        | 1.321      | 0.002    |
|                         | N(1)–H(1) $\cdots\text{Cl}^-$ <sup>[a]</sup> | 1.018      | 0.020    |
|                         | N(2)–H(2) $\cdots\text{Cl}^-$ <sup>[b]</sup> | 0.920      | 0.030    |
|                         | O–H $\cdots\text{Cl}^-$                      | 0.933      | 0.027    |
| 6 $\cdots\text{Br}^-$   | C $\cdots\text{Br}^-$                        | 1.249      | 0.006    |
|                         | N(1)–H(1) $\cdots\text{Br}^-$ <sup>[a]</sup> | 0.999      | 0.022    |
|                         | N(2)–H(2) $\cdots\text{Br}^-$ <sup>[b]</sup> | 0.949      | 0.026    |
|                         | O–H $\cdots\text{Br}^-$                      | 0.933      | 0.027    |
| 6 $\cdots\text{NO}_3^-$ | C $\cdots\text{O}^-$                         | 1.341      | 0.003    |
|                         | N(1)–H(1) $\cdots\text{O}^-$ <sup>[a]</sup>  | 0.975      | 0.026    |
|                         | N(2)–H(2) $\cdots\text{O}^-$ <sup>[b]</sup>  | 0.947      | 0.032    |
|                         | O–H $\cdots\text{O}^-$                       | 0.965      | 0.038    |
| 7 $\cdots\text{Cl}^-$   | O–H $\cdots\text{Cl}^-$                      | 0.994      | 0.022    |
|                         | N(1)–H(1) $\cdots\text{Cl}^-$ <sup>[a]</sup> | 0.946      | 0.026    |
|                         | N(2)–H(2) $\cdots\text{Cl}^-$ <sup>[b]</sup> | 0.995      | 0.022    |
|                         | N(2)–H(2) $\cdots\text{Cl}^-$ <sup>[b]</sup> | 0.961      | 0.025    |
| 7 $\cdots\text{Br}^-$   | O–H $\cdots\text{Br}^-$                      | 1.010      | 0.020    |
|                         | N(1)–H(1) $\cdots\text{Br}^-$ <sup>[a]</sup> | 0.966      | 0.025    |
|                         | N(2)–H(2) $\cdots\text{Br}^-$ <sup>[b]</sup> | 0.094      | 0.032    |
|                         | N(2)–H(2) $\cdots\text{Br}^-$ <sup>[b]</sup> | 0.095      | 0.032    |
| 7 $\cdots\text{NO}_3^-$ | C–HO $\cdots\text{O}^-$                      | 1.138      | 0.007    |
|                         | N(1)–H(1) $\cdots\text{O}^-$ <sup>[a]</sup>  | 0.976      | 0.025    |
|                         | N(2)–H(2) $\cdots\text{O}^-$ <sup>[b]</sup>  | 0.950      | 0.033    |
|                         | O–H $\cdots\text{O}^-$                       | 0.968      | 0.038    |

<sup>[a]</sup> BCP related to –NH group closer to anthracene ring; <sup>[b]</sup> BCP related to –NH group closer to benzene ring.
