# Supplementary material for: The design of anion–π interactions and hydrogen bonds for the recognition of chloride, bromide and nitrate anions
Source: Royal Society of Chemistry journal article supplement (doi:10.1039/d1cp00113b), 2021-01-01
Supplement: d1cp00113b2.pdf [file d1cp00113b2.pdf]

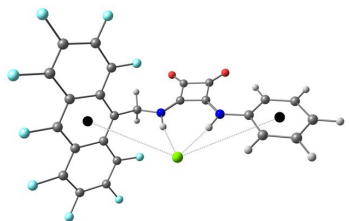

2...Cl<sup>-</sup>

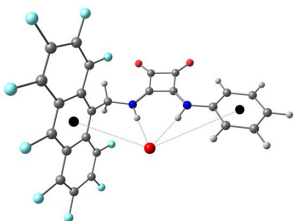

2...Br<sup>-</sup>

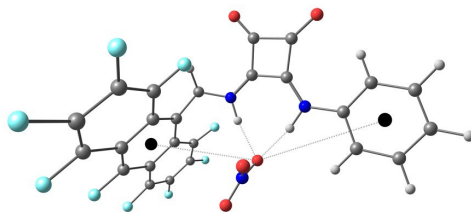

2...NO<sub>3</sub><sup>-</sup>

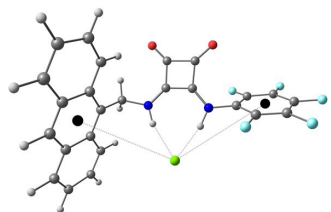

3...Cl<sup>-</sup>

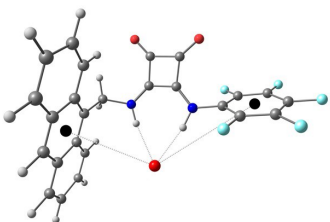

3...Br<sup>-</sup>

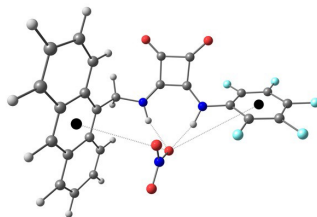

3...NO<sub>3</sub><sup>-</sup>

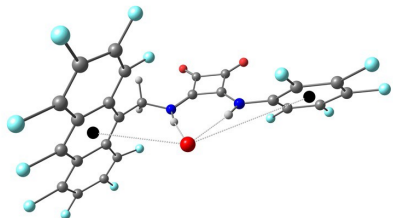

4...Br<sup>-</sup>

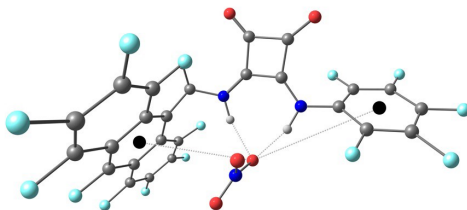

4...NO<sub>3</sub><sup>-</sup>
