# Supplementary material for: The design of anion–π interactions and hydrogen bonds for the recognition of chloride, bromide and nitrate anions
Source: Royal Society of Chemistry journal article supplement (doi:10.1039/d1cp00113b), 2021-01-01
Supplement: d1cp00113b3.pdf [file d1cp00113b3.pdf]

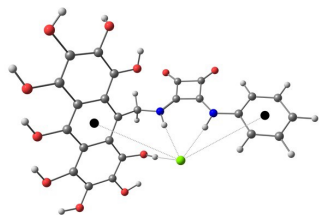

5...Cl<sup>-</sup>

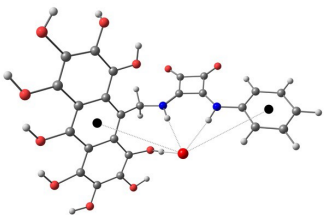

5...Br<sup>-</sup>

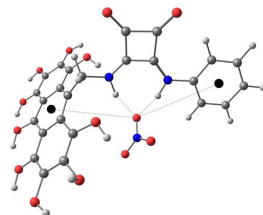

5...NO<sub>3</sub><sup>-</sup>

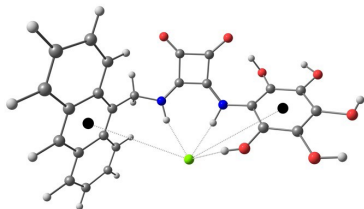

6...Cl<sup>-</sup>

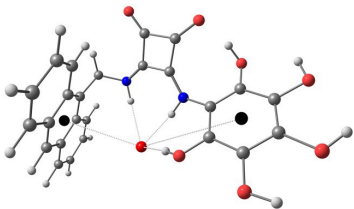

6...Br<sup>-</sup>

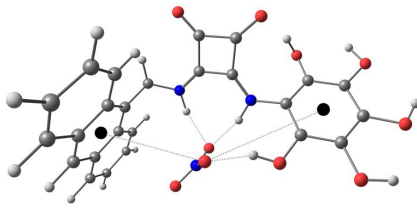

6...NO<sub>3</sub><sup>-</sup>

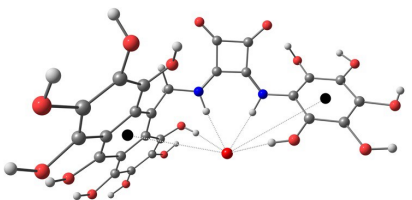

7...Br<sup>-</sup>

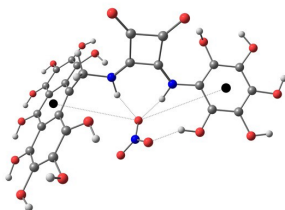

7...NO<sub>3</sub><sup>-</sup>
