# Supplementary material for: The design of anion–π interactions and hydrogen bonds for the recognition of chloride, bromide and nitrate anions
Source: Royal Society of Chemistry journal article supplement (doi:10.1039/d1cp00113b), 2021-01-01
Supplement: d1cp00113b5.pdf [file d1cp00113b5.pdf]

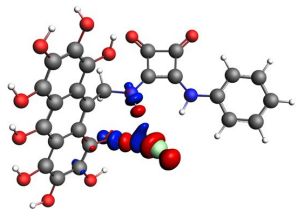

**5**...Cl<sup>-\*</sup>

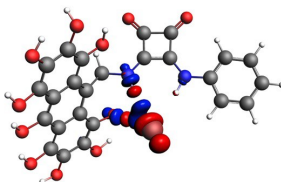

**5**...Br<sup>-\*</sup>

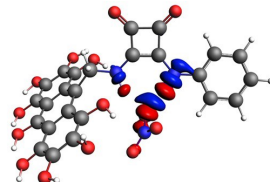

**5**...NO<sub>3</sub><sup>-Φ</sup>

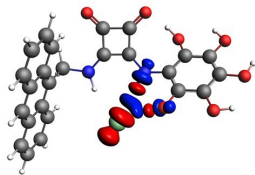

**6**...Cl<sup>-\*</sup>

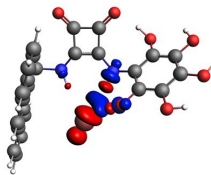

**6**...Br<sup>-\*</sup>

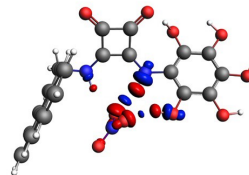

**6**...NO<sub>3</sub><sup>-\*</sup>

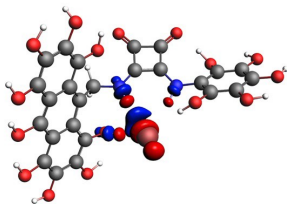

**7**...Br<sup>-\*</sup>

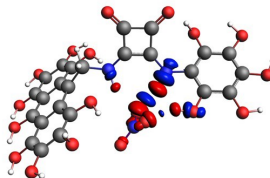

**7**...NO<sub>3</sub><sup>-Φ</sup>
