# Supplementary material for: The design of anion–π interactions and hydrogen bonds for the recognition of chloride, bromide and nitrate anions
Source: Royal Society of Chemistry journal article supplement (doi:10.1039/d1cp00113b), 2021-01-01
Supplement: d1cp00113b6.pdf [file d1cp00113b6.pdf]

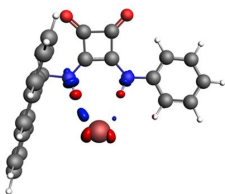

1...Br<sup>\*</sup>

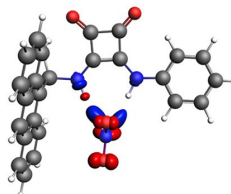

1...NO<sub>3</sub><sup>-\*</sup>

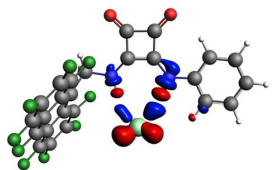

2...Cl<sup>d</sup>

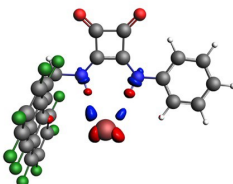

2...Br<sup>b</sup>

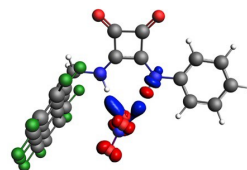

2...NO<sub>3</sub><sup>b</sup>

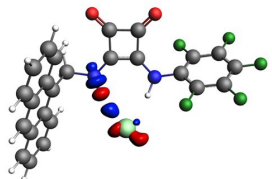

3...Cl<sup>\*</sup>

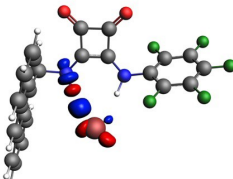

3...Br<sup>b</sup>

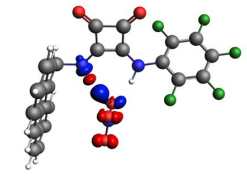

3...NO<sub>3</sub><sup>\*</sup>

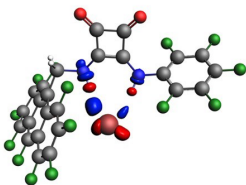

4...Br<sup>b</sup>

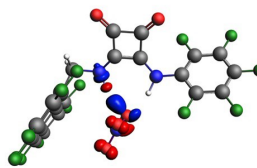

4...NO<sub>3</sub><sup>\*</sup>
