# Supplementary material for: The design of anion–π interactions and hydrogen bonds for the recognition of chloride, bromide and nitrate anions
Source: Royal Society of Chemistry journal article supplement (doi:10.1039/d1cp00113b), 2021-01-01
Supplement: d1cp00113b8.pdf [file d1cp00113b8.pdf]

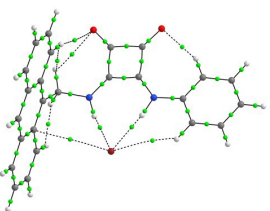

**1-Br**

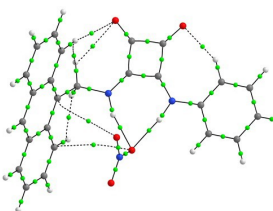

**1-NO<sub>3</sub><sup>-</sup>**

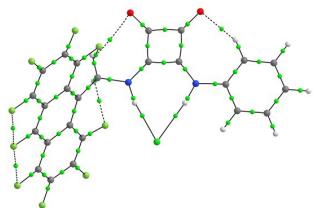

**2-Cl<sup>-</sup>**

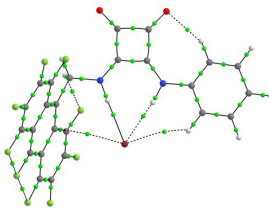

**2-Br<sup>-</sup>**

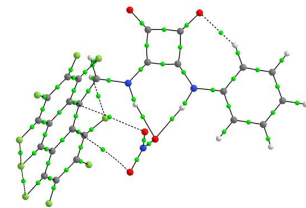

**2-NO<sub>3</sub><sup>-</sup>**

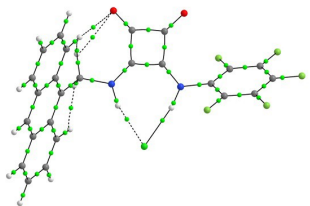

**3-Cl<sup>-</sup>**

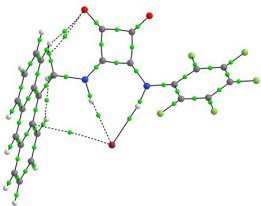

**3-Br<sup>-</sup>**

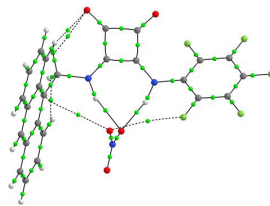

**3-NO<sub>3</sub><sup>-</sup>**

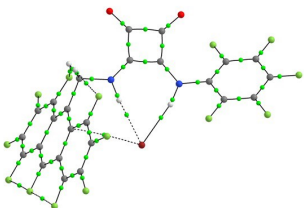

**4-Br<sup>-</sup>**

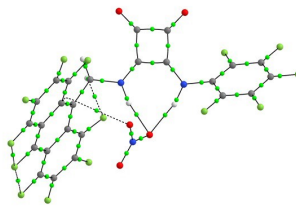

**4-NO<sub>3</sub><sup>-</sup>**
