# Supplementary figures and images for: The design of anion–π interactions and hydrogen bonds for the recognition of chloride, bromide and nitrate anions
Source: Royal Society of Chemistry journal article supplement (doi:10.1039/d1cp00113b), 2021-01-01

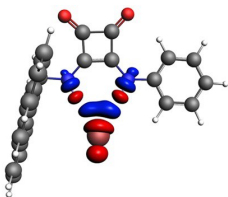

1...Br \*

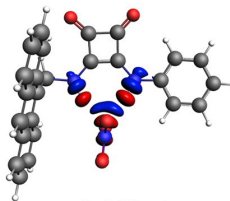

1...NO<sub>3</sub><sup>-</sup> \*

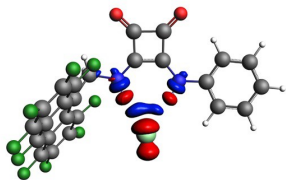

2...Cl \*

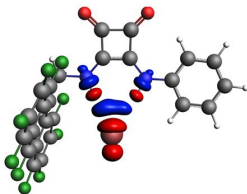

2...Br \*

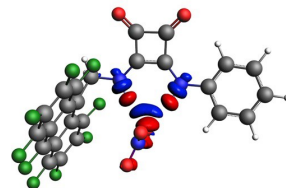

2...NO<sub>3</sub><sup>-</sup> \*

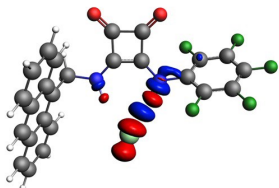

3...Cl \*

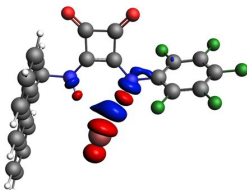

3...Br \*

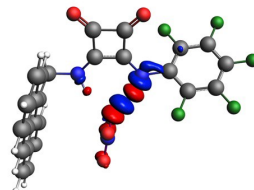

3...NO<sub>3</sub><sup>-</sup> \*

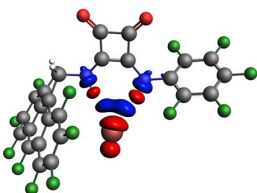

4...Br \*

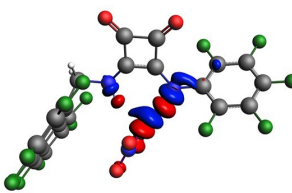

4...NO<sub>3</sub><sup>-</sup> ‡

Supplement: d1cp00113b4.pdf [file d1cp00113b4.pdf]

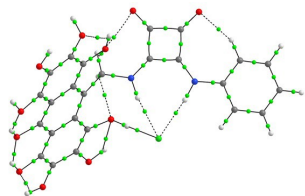

**5-Cl**

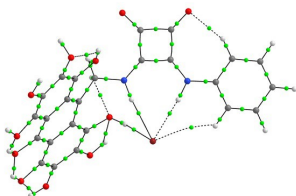

**5-Br**

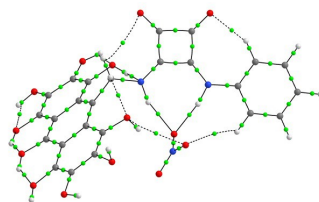

**5-NO<sub>3</sub><sup>-</sup>**

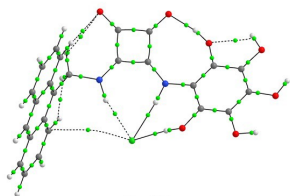

**6-Cl**

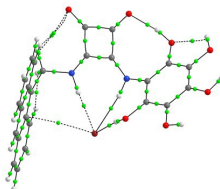

**6-Br**

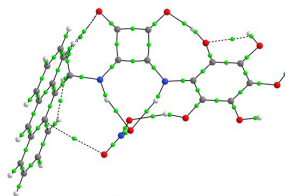

**6-NO<sub>3</sub><sup>-</sup>**

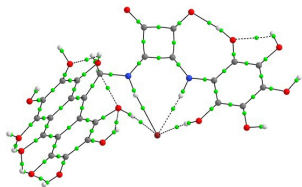

**7-Br**

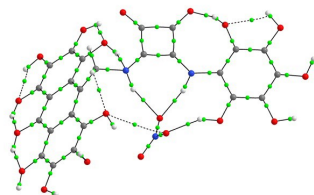

**7-NO<sub>3</sub><sup>-</sup>**

Supplement: d1cp00113b9.pdf [file d1cp00113b9.pdf]
